# Supplementary material
Source: PubMed Central journal article supplement (PMC4553813)
Supplement: pnas.1506460112.sapp.pdf [file pnas.1506460112.sapp.pdf]

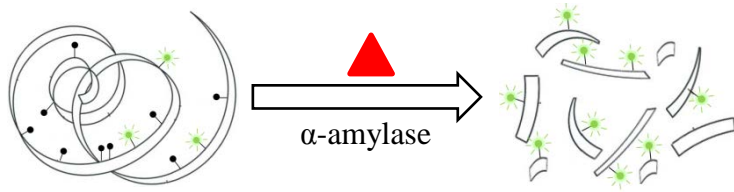

Schematic image of the BODIPY-Starch

**Fig.1A**

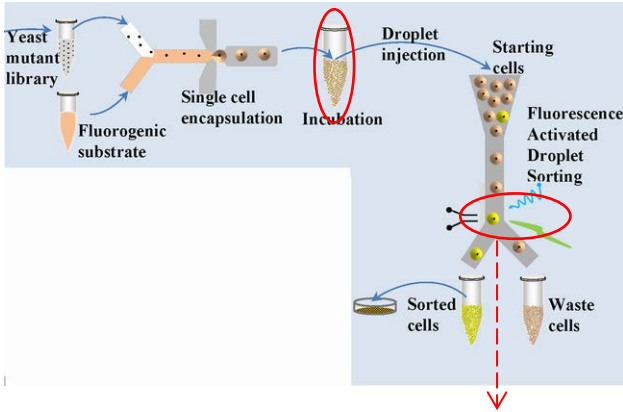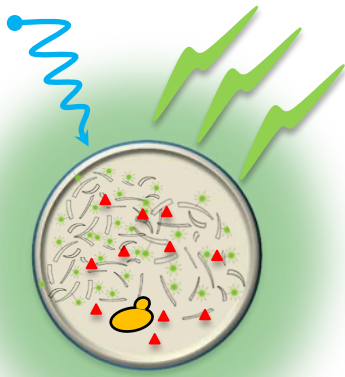

Droplet with a better  $\alpha$ -amylase producing cell

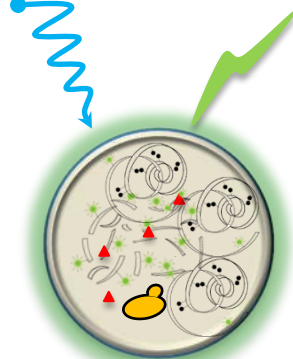

Droplet with a  $\alpha$ -amylase producing cell

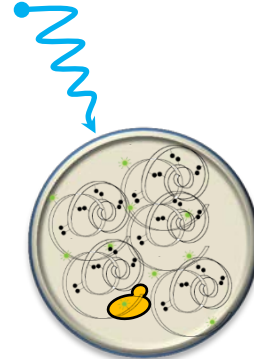

Droplet with non- $\alpha$ -amylase producing cell

**Supplementary Figure S1** Fluorescent substrate digestion in the droplet. Droplet with a better  $\alpha$ -amylase producing cell will have higher  $\alpha$ -amylase concentration inside the droplet and thus more BODIPY-starch can be degraded in the same unit of time. This will give rise to a stronger fluorescent signal that will be emitted upon excitation.

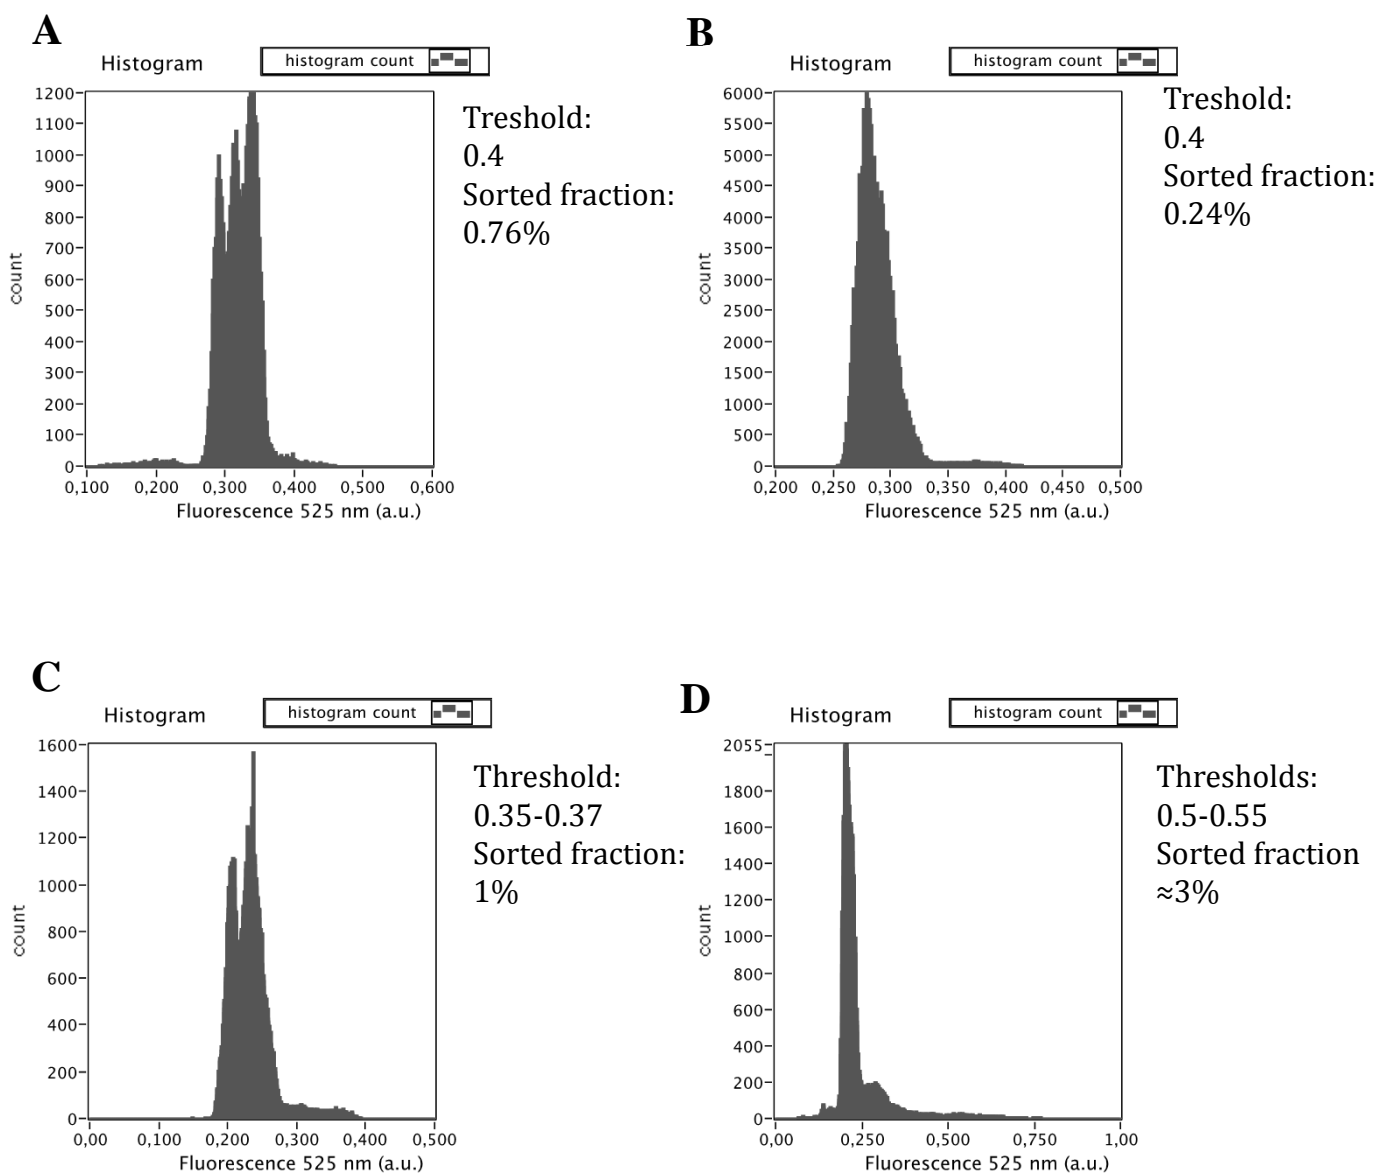

**Supplementary Figure S2** Histogram showing droplet fluorescence of yeast libraries in the second round of screening. **(A)** The Library MH34-11. **(B)** The Library MH34-14. **(C)** The Library MH34-8. **(D)** The Library MH23-11.

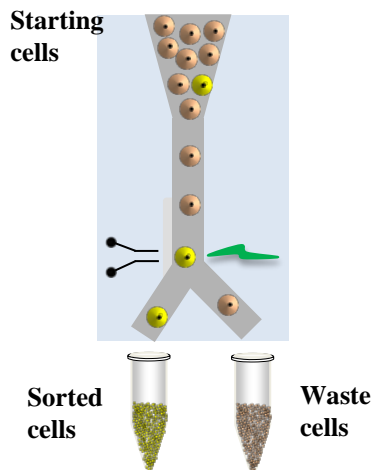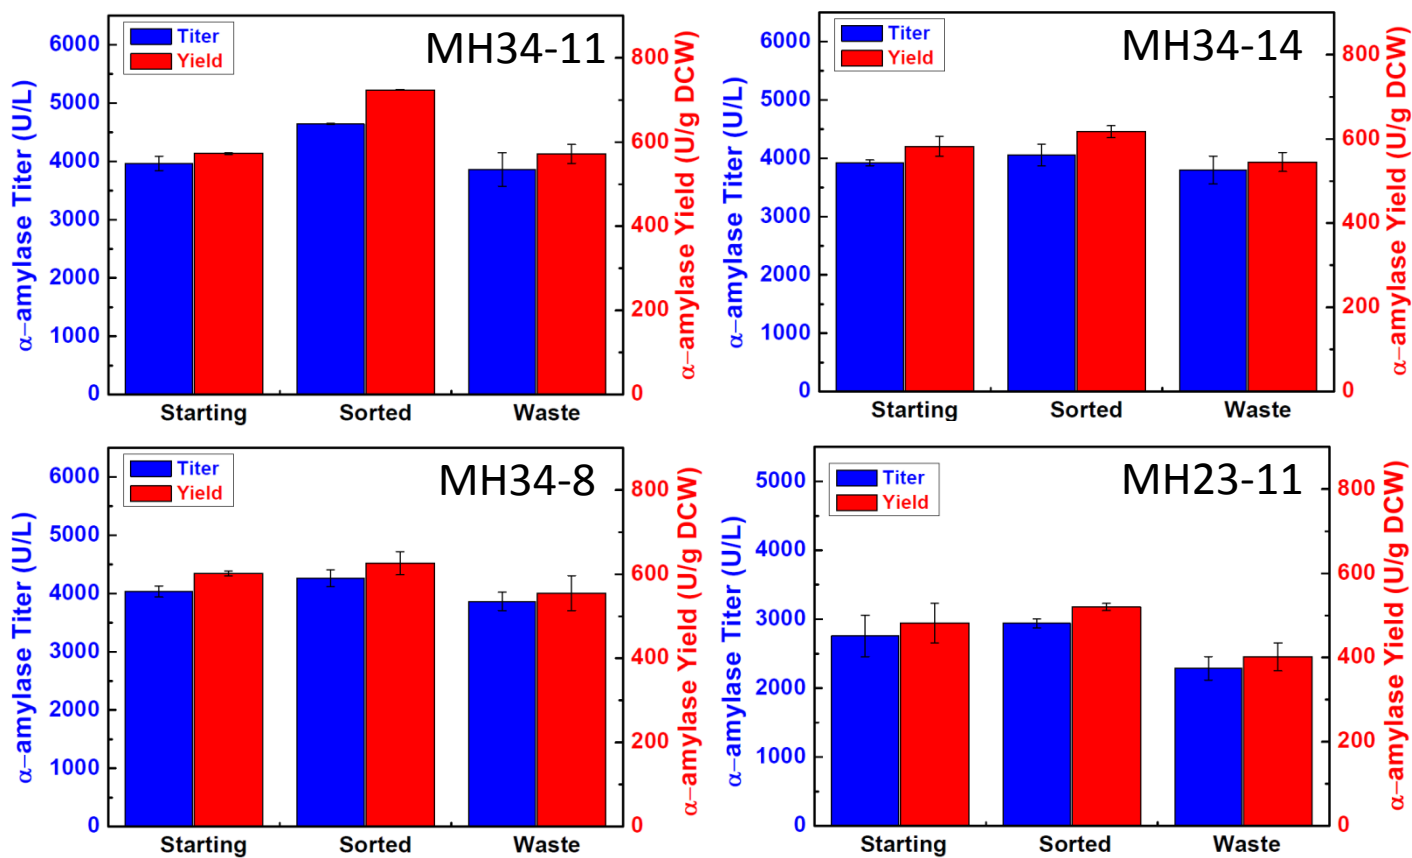

**Supplementary Figure S3** Fermentation of mixed colonies for evaluation of the titer and yield of  $\alpha$ -amylase produced by different yeast populations before and after sorting. 50 colonies were randomly picked up from different populations of the library and mixed together for fermentation.

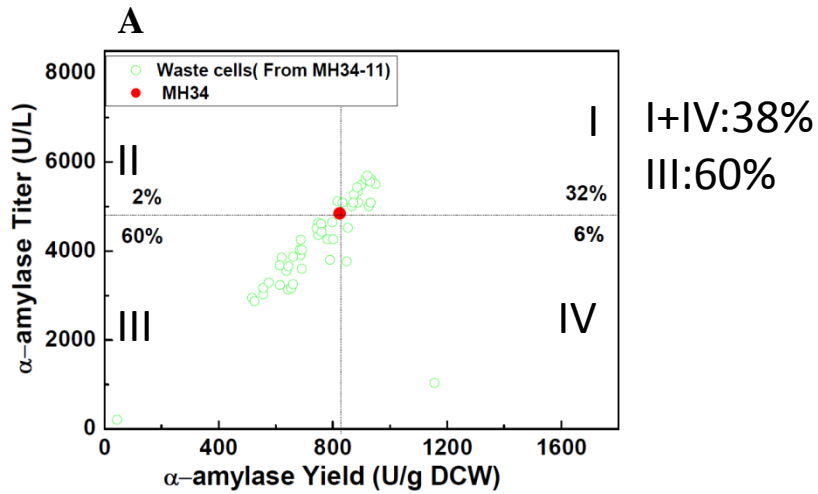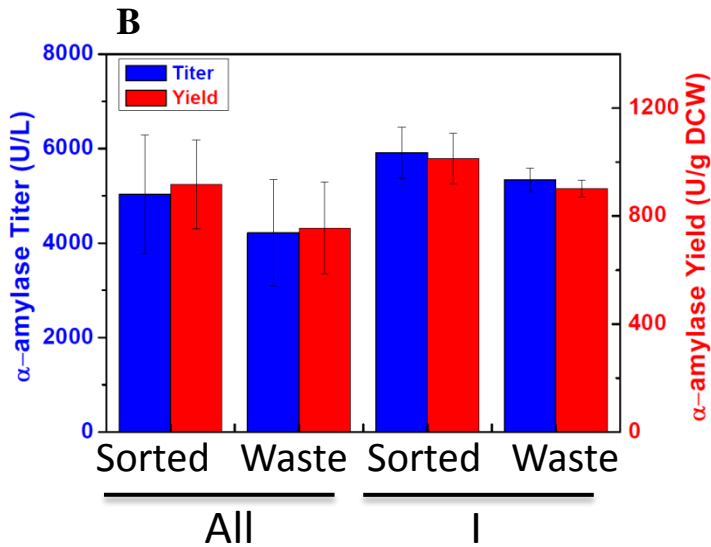

**Supplementary Figure S4** (A) 50 waste colonies from the library MH34-11 were tested in tube fermentation. (B) Average  $\alpha$ -amylase titer and yield of sorted cells and waste cells from the library MH34-11.

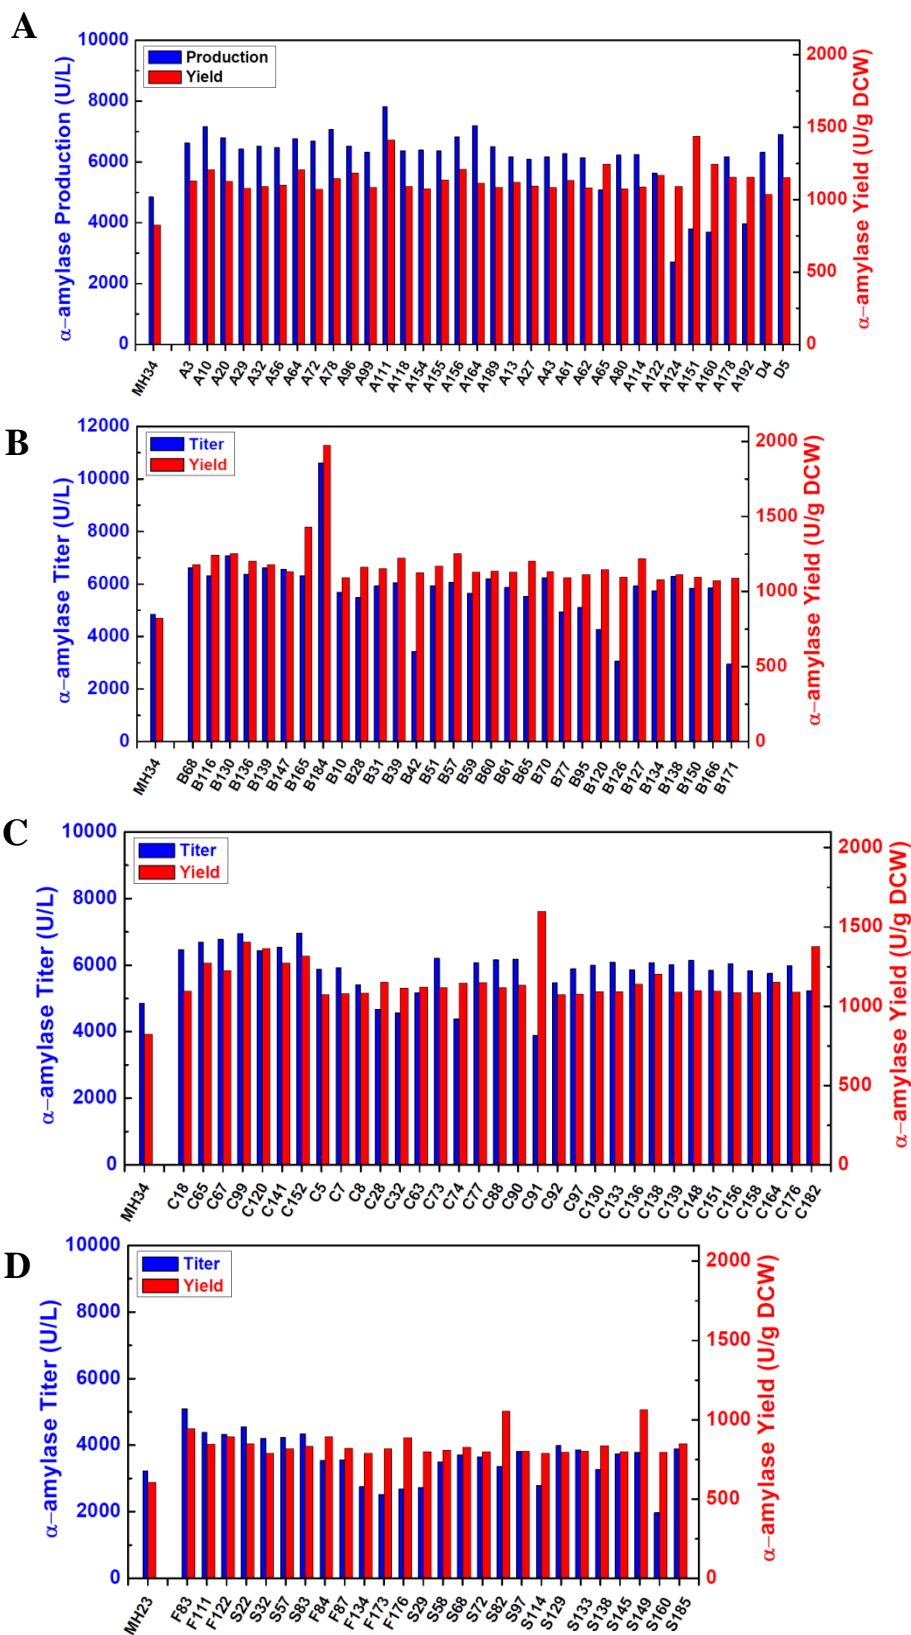

**Supplementary Figure S5** Strains achieve at least 30%  $\alpha$ -amylase yield increase in tube fermentation. From the sorted population of the library **(A)** MH34-11. **(B)** MH34-14. **(C)** MH34-8. **(D)** MH23-11.

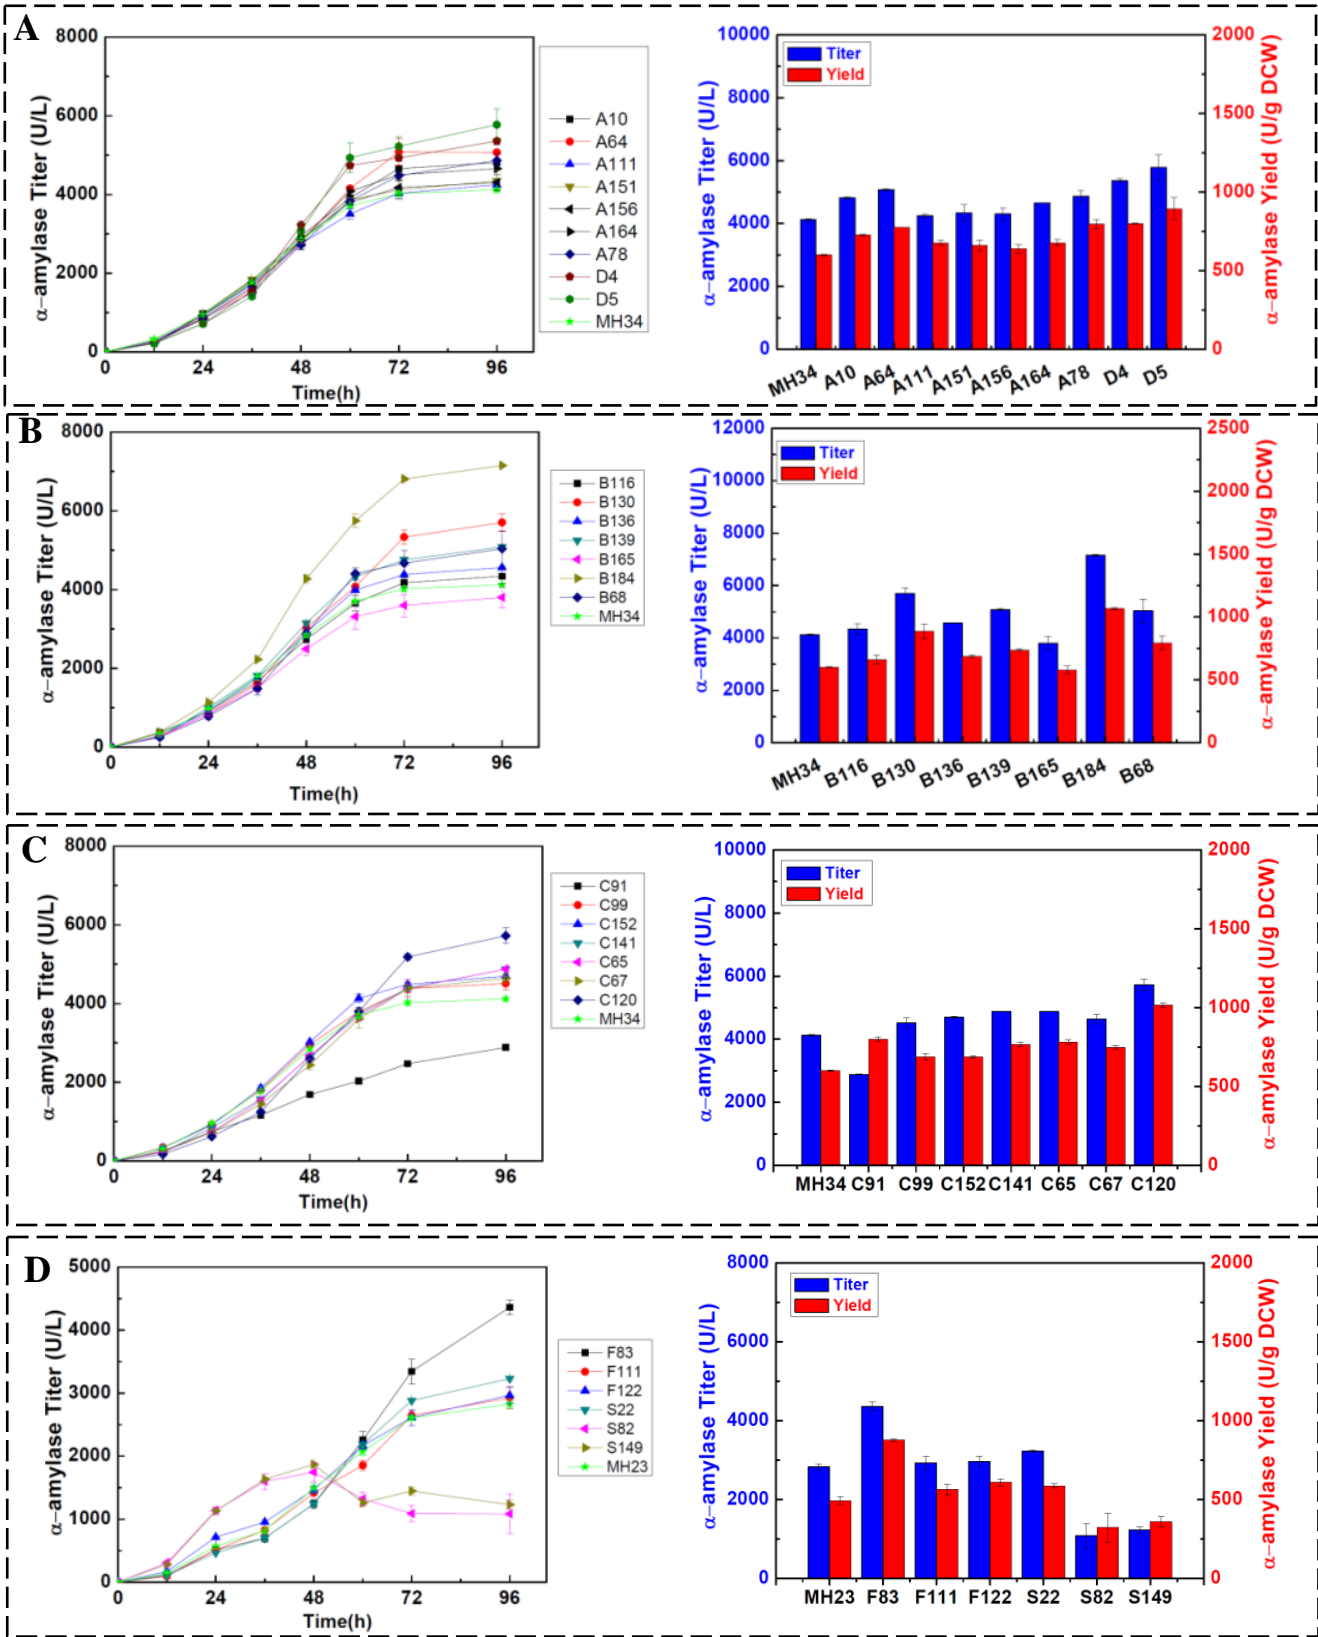

**Supplementary Figure S6** Shake flask fermentation of selected strains based on tube fermentations. Left panel:  $\alpha$ -amylase production over time; Right panel: the final  $\alpha$ -amylase titer and yield (at 96 h). **(A)** Selected strains from the library MH34-11. **(B)** Selected strains from the library MH34-14. **(C)** Selected strains from the library MH34-8. **(D)** Selected strains from the library MH23-11.

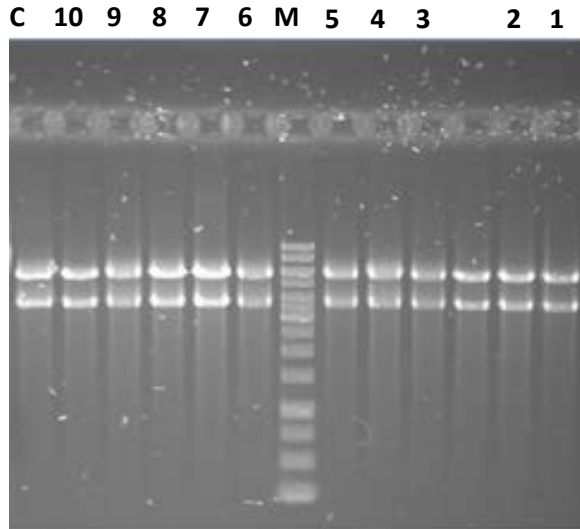

**Supplementary Figure S7** Restriction analysis of plasmids from selected mutant strains showed that all plasmids were structural stable. Plasmids from: 1.AAC, 2.M715, 3.MH23, 4.MH34, 5.A64, 6.B130, 7.B184, 8.C120, 9.D5 and 10.F83. C: Control; M: DNA Ladder.

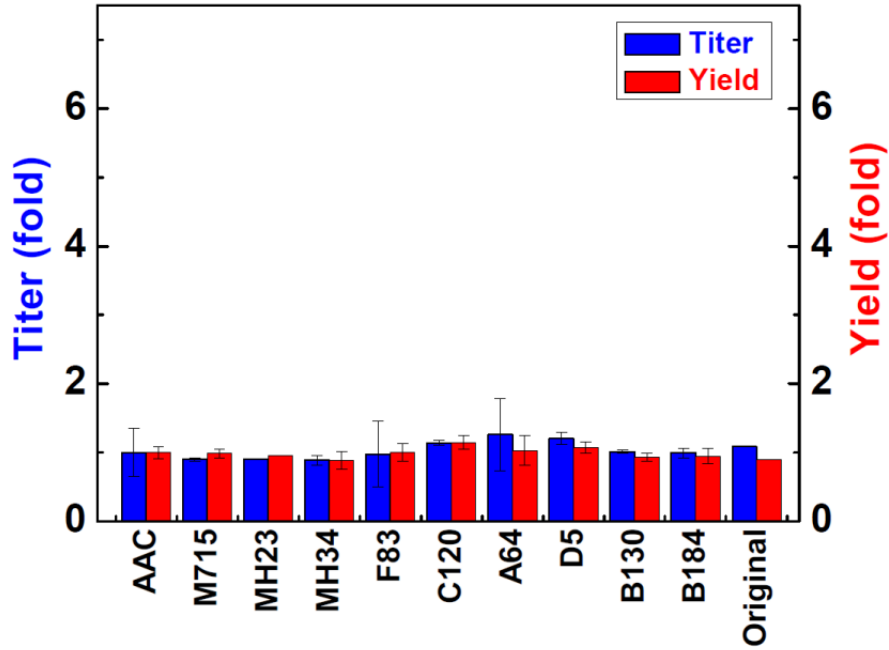

**Supplementary Figure S8**  $\alpha$ -amylase production capacity of wild type strain harboring different isolated plasmids from the wild type and selected mutant strains. The production capacity of  $\alpha$ -amylase was found to be almost identical for all strains.



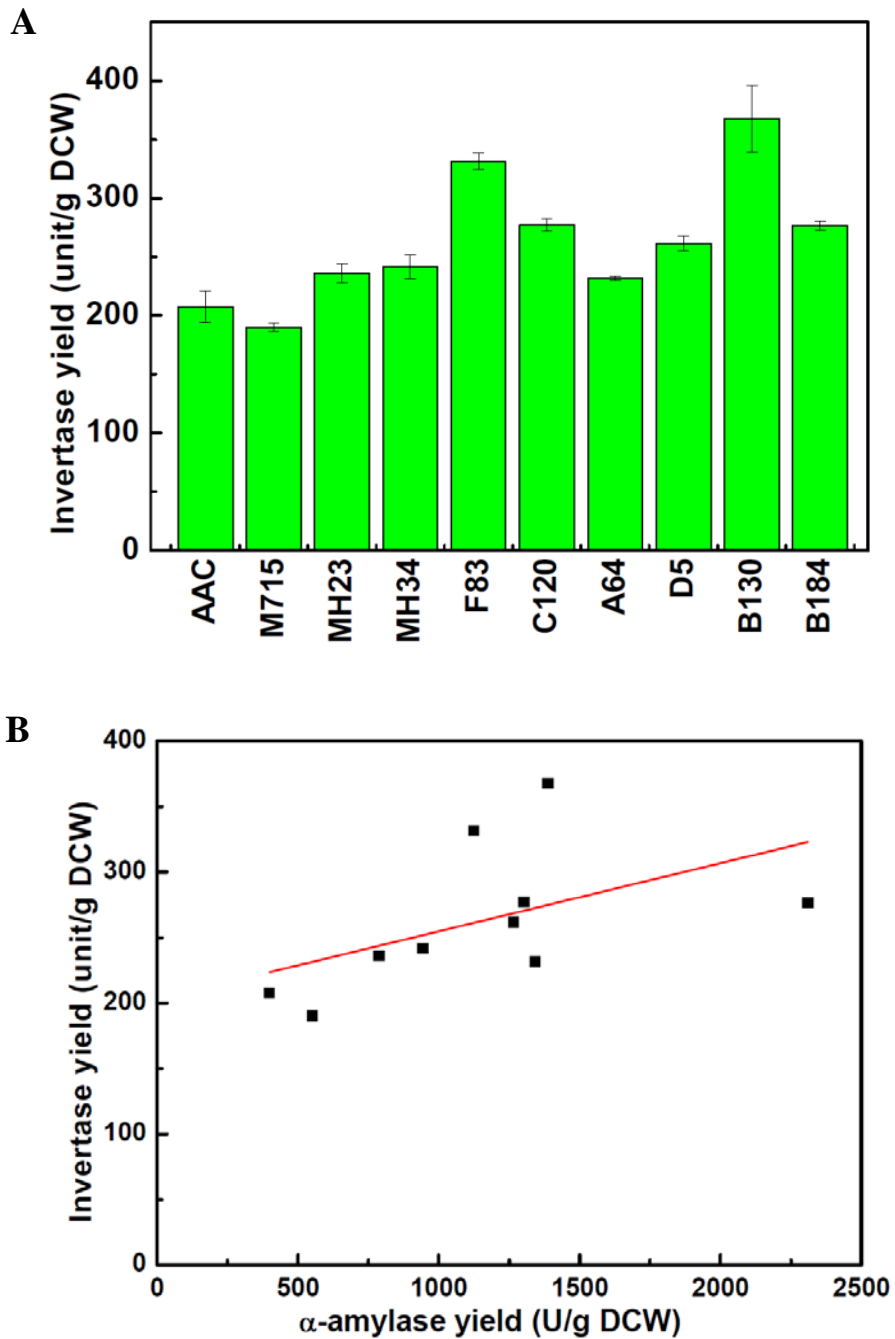

**Supplementary Figure S9** (A) Invertase activity of selected mutant strains. (B) A scatter plotting shows the positive correlation between invertase yield and  $\alpha$ -amylase yield.

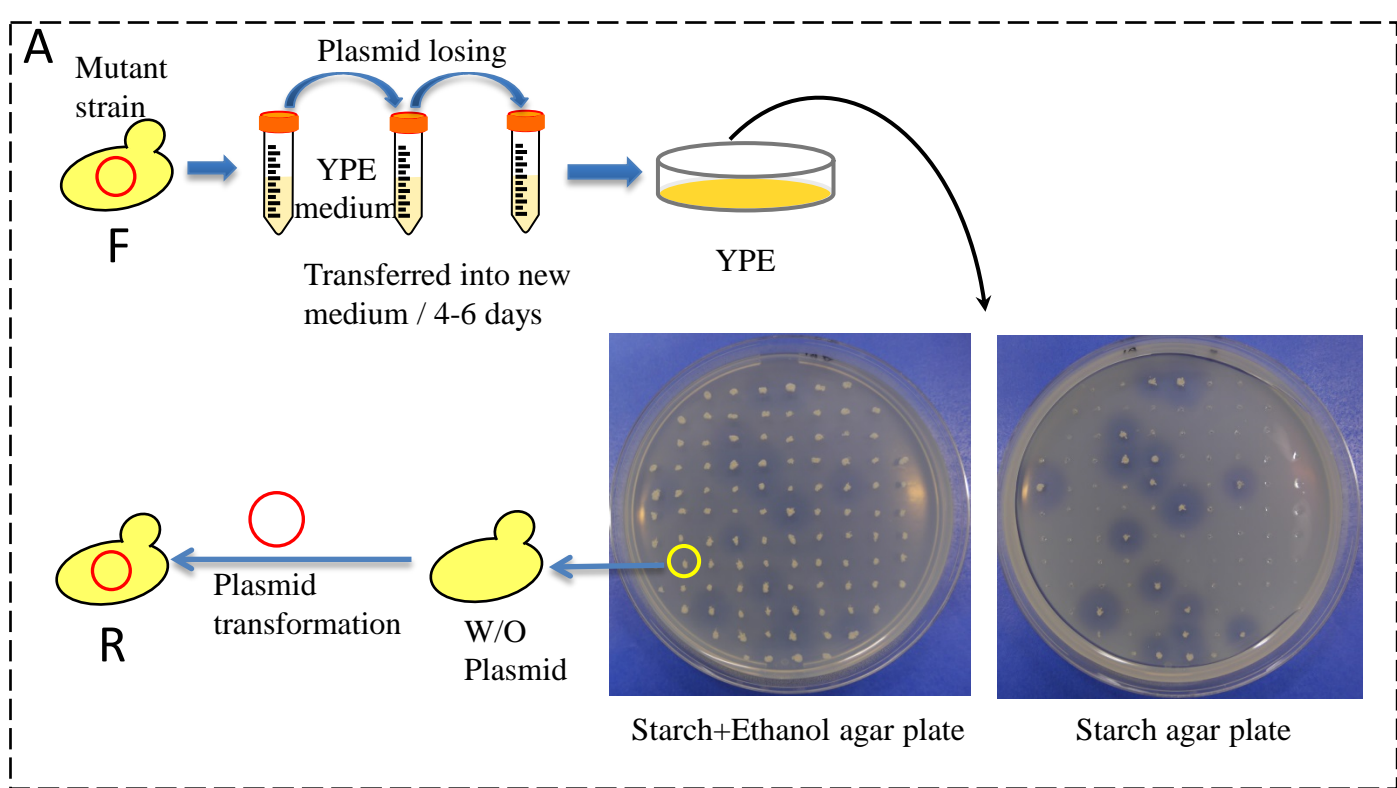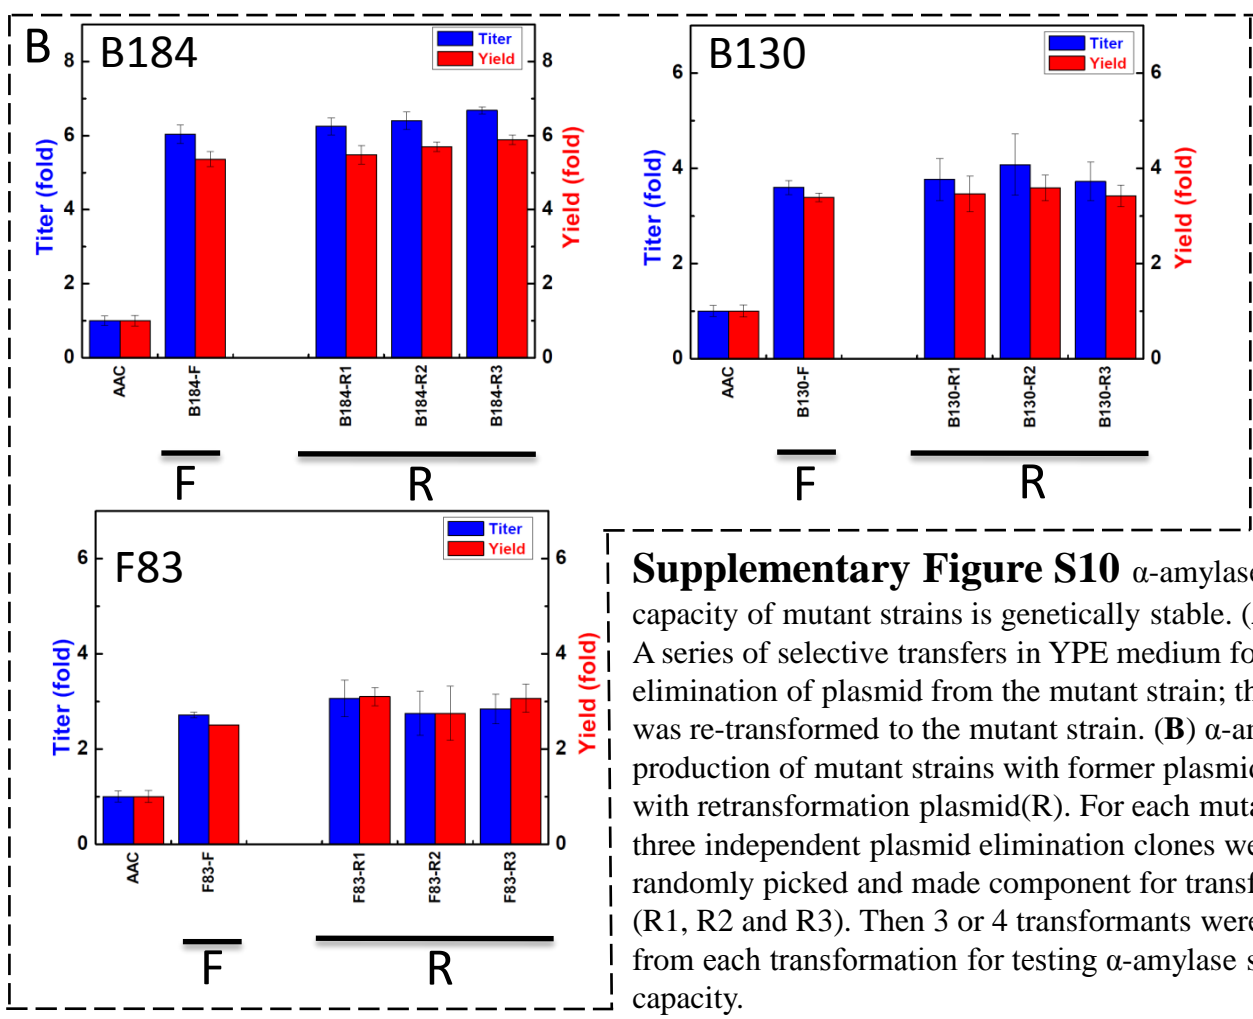

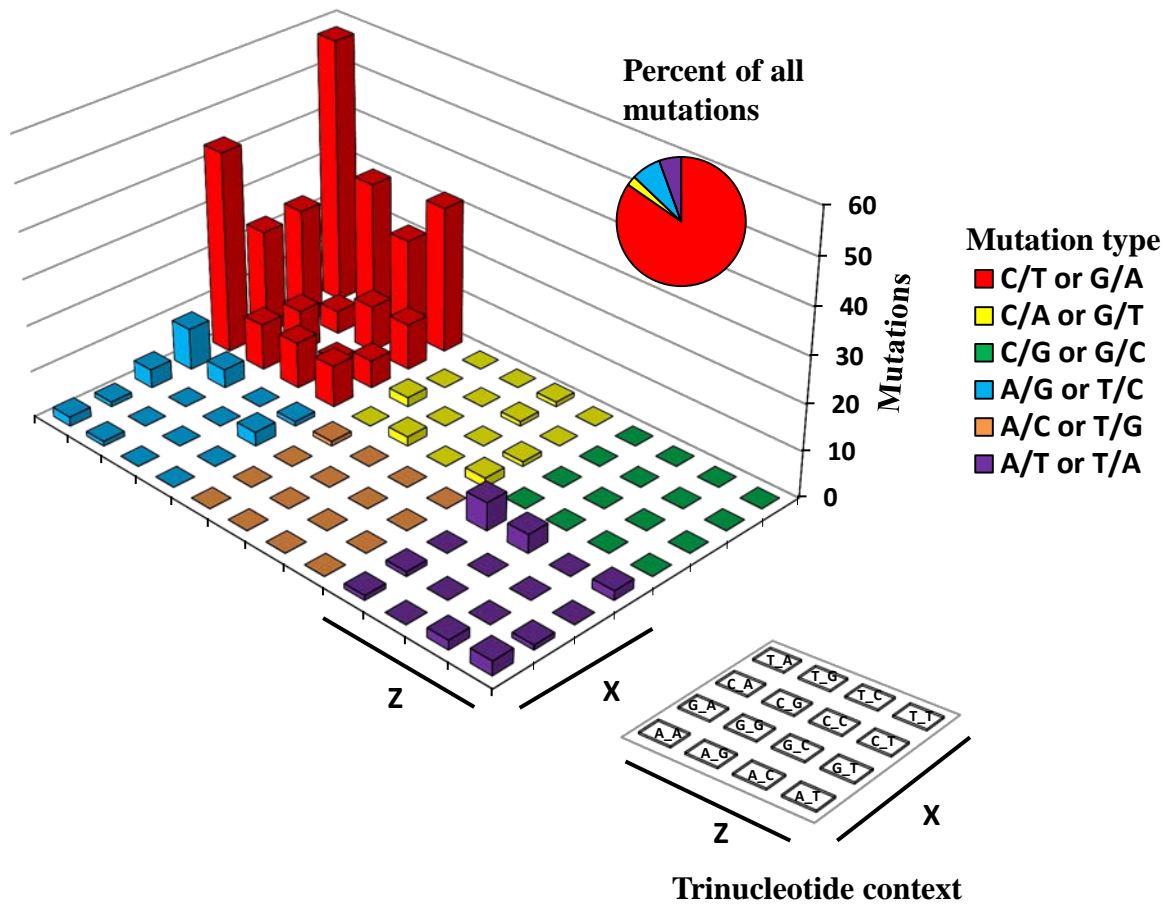

**Supplementary Figure S11** Classification of all single nucleotide substitutions of mutant strains. The C to T substitution and the G to A substitution are dominant.

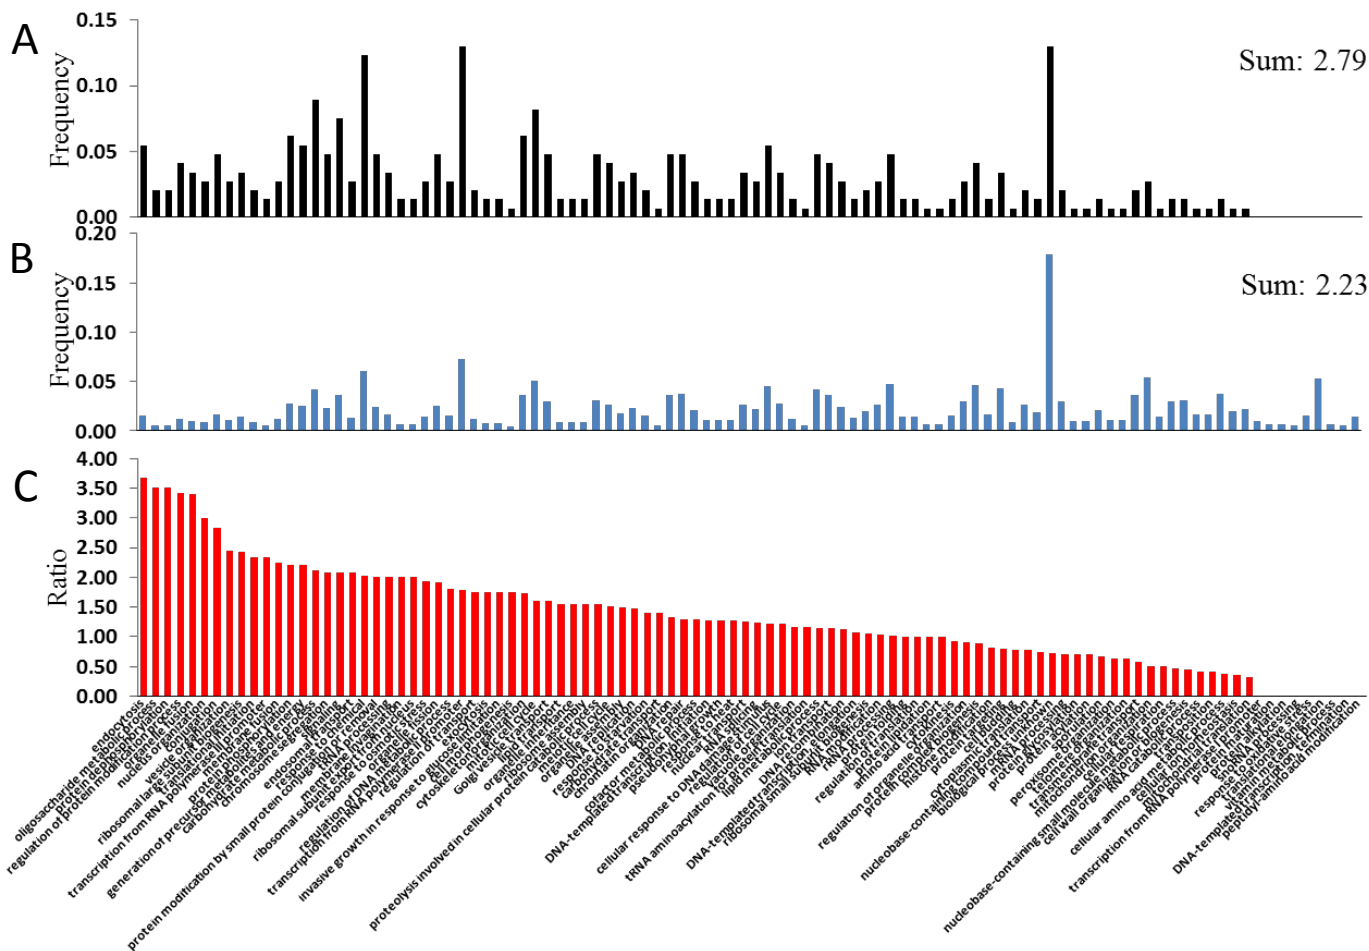

**Supplementary Figure S12** GO Slim Process category analysis. (A) 146 mutated genes that give rise to altered proteins. (B) all 6334 genes of *S. cerevisiae*. (C) The ratio of the frequency of mutated genes in process category to the frequency of all genes in process category.

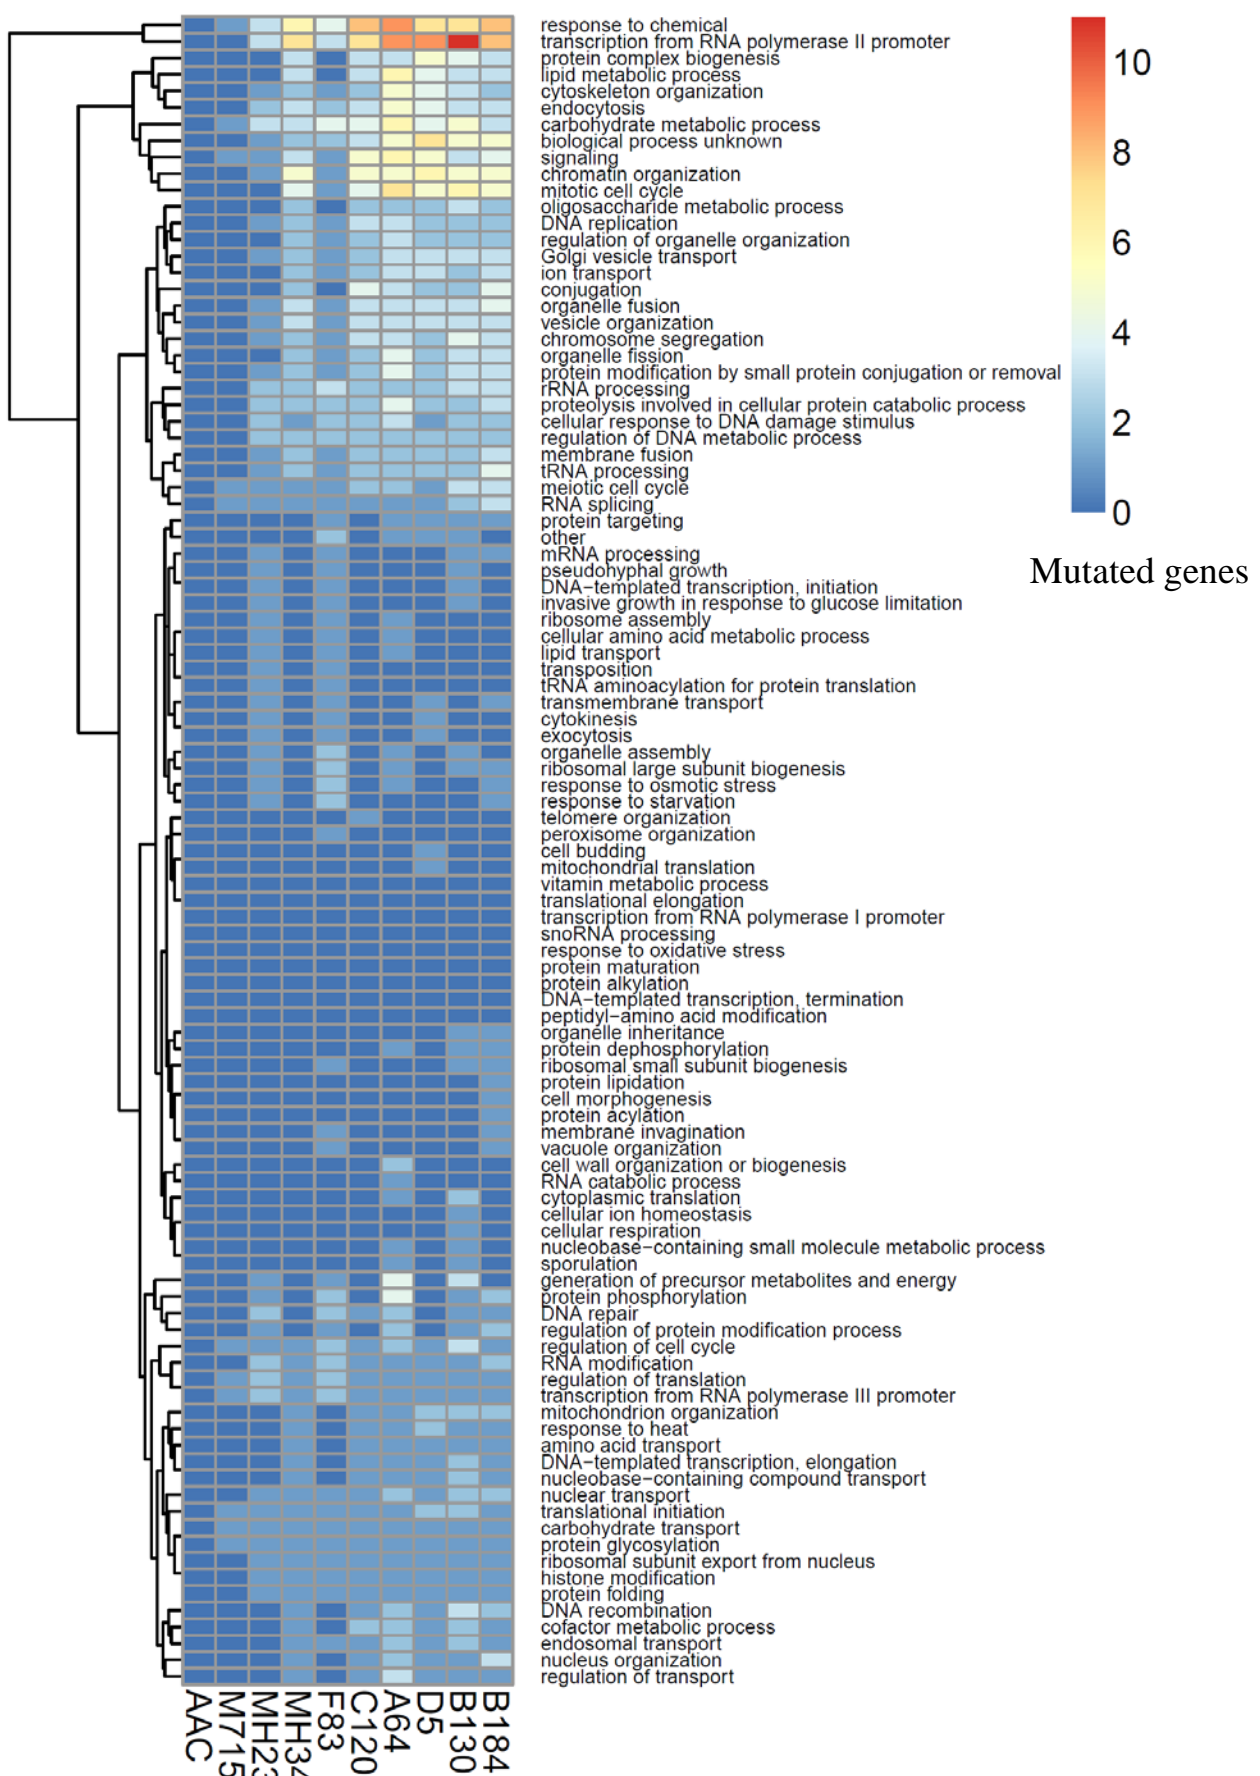

**Supplementary Figure S13** Mutation genes of mutant strains in GO Slim Process categories.

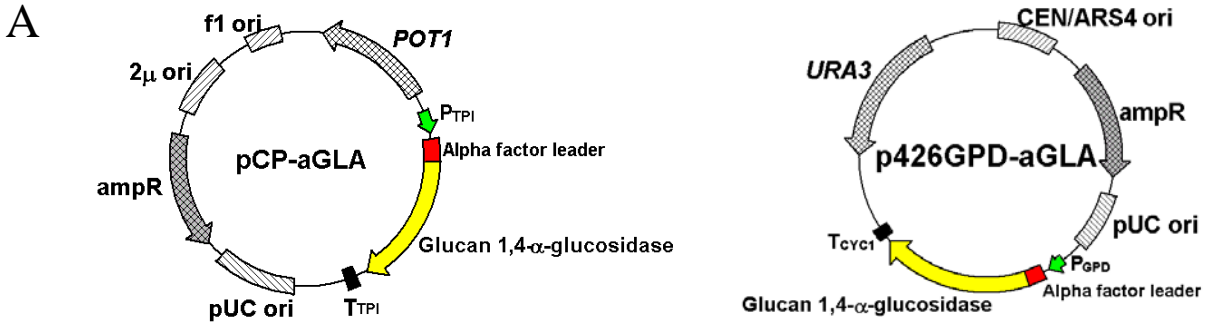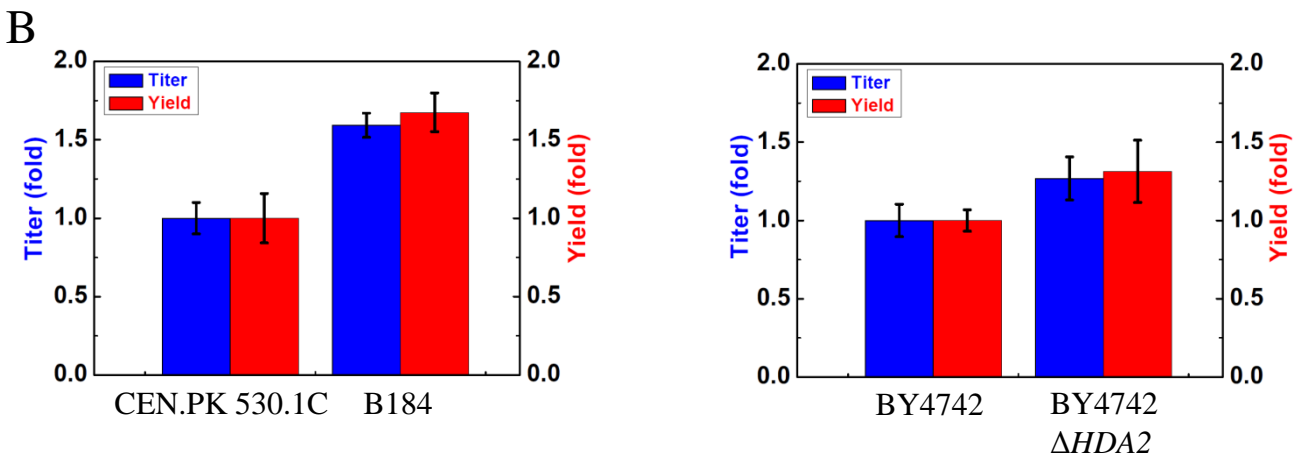

**Supplementary Figure S14** Secretion of glucan 1,4- $\alpha$ -glucosidase by different *S. cerevisiae* strains. **(A)** Glucan 1,4- $\alpha$ -glucosidase gene derived from *Rhizopus oryzae* is cloned in plasmid CPOTud and p426GPD and named pCP-aGLA and p426GPD-aGLA respectively, which are used for secretory expression in CEN.PK and BY4742 background. Alpha factor leader is used as the secretory signal peptide. **(B)** Glucan 1,4- $\alpha$ -glucosidase secretion increases in mutant strains compared with wildtype strains.

**Table S1.** Chromosome structural variations of strains.

| Whole/partial chromosome duplications |               |                                    |             |  |  |
|---------------------------------------|---------------|------------------------------------|-------------|--|--|
| chromosome                            | position      | samples                            | type        |  |  |
| chr11                                 | 160000-320000 | all strains                        | duplication |  |  |
| chr3                                  | whole chr     | MH34 and strains derived from MH34 | duplication |  |  |

  

| Smaller deletions |                 |                                    |          |         |             |
|-------------------|-----------------|------------------------------------|----------|---------|-------------|
| chromosome        | position        | samples                            | type     | gene id | gene        |
| chr4              | 554701-555600   | all strains                        | deletion | YDR050C | <i>TPI1</i> |
| chr4              | 1155000-1159000 | MH34 and strains derived from MH34 | deletion | no gene |             |

**Table S2.** List of Genes on the chromosome III of CEN.PK 113.7D.

| Systematic gene name | Standard gene name | Gene description                                                       |
|----------------------|--------------------|------------------------------------------------------------------------|
| YCL001W              | RER1               | Protein involved in retention of membrane proteins                     |
| YCL001W-A            |                    | Putative protein of unknown function                                   |
| YCL001W-B            |                    | Putative protein of unknown function                                   |
| YCL002C              |                    | Putative protein of unknown function                                   |
| YCL004W              | PGS1               | Phosphatidylglycerolphosphate synthase                                 |
| YCL005W              | LDB16              | Protein of unknown function                                            |
| YCL008C              | STP22              | Component of the ESCRT-I complex                                       |
| YCL009C              | ILV6               | Regulatory subunit of acetolactate synthase                            |
| YCL010C              | SGF29              | Component of the HAT/Core module of the SAGA, SLIK, and ADA complexes  |
| YCL011C              | GBP2               | Poly(A+) RNA-binding protein                                           |
| YCL012C              |                    | Putative protein of unknown function                                   |
| YCL014W              | BUD3               | Protein involved in bud-site selection                                 |
| YCL016C              | DCC1               | Subunit of a complex with Ctf8p and Ctf18p                             |
| YCL017C              | NFS1               | Cysteine desulfurase                                                   |
| YCL018W              | LEU2               | Beta-isopropylmalate dehydrogenase (IMDH)                              |
| YCL021W-A            |                    | Putative protein of unknown function                                   |
| YCL024W              | KCC4               | Protein kinase of the bud neck involved in the septin checkpoint       |
| YCL025C              | AGP1               | Low-affinity amino acid permease with broad substrate range            |
| YCL026C-A            | FRM2               | Type II nitroreductase, using NADH as reductant                        |
| YCL026C-B            | HBN1               | Protein of unknown function                                            |
| YCL027W              | FUS1               | Membrane protein localized to the shmoo tip                            |
| YCL028W              | RNQ1               | [PIN(+)] prion                                                         |
| YCL029C              | BIK1               | Microtubule-associated protein                                         |
| YCL030C              | HIS4               | Multifunctional enzyme containing phosphoribosyl-ATP pyrophosphatase   |
| YCL031C              | RRP7               | Essential protein involved in rRNA processing and ribosome biogenesis  |
| YCL032W              | STE50              | Adaptor protein for various signaling pathways                         |
| YCL033C              | MXR2               | Methionine-R-sulfoxide reductase                                       |
| YCL034W              | LSB5               | Protein of unknown function                                            |
| YCL035C              | GRX1               | Glutathione-dependent disulfide oxidoreductase                         |
| YCL036W              | GFD2               | Protein of unknown function                                            |
| YCL037C              | SRO9               | Cytoplasmic RNA-binding protein                                        |
| YCL038C              | ATG22              | Vacuolar integral membrane protein required for efflux of amino acids  |
| YCL039W              | GID7               | Subunit of GID Complex that binds directly to central component Vid30p |
| YCL040W              | GLK1               | Glucokinase                                                            |
| YCL043C              | PDI1               | Protein disulfide isomerase                                            |
| YCL044C              | MGR1               | Subunit of the mitochondrial (mt) i-AAA protease supercomplex          |
| YCL045C              | EMC1               | Member of conserved endoplasmic reticulum membrane complex             |
| YCL047C              | POF1               | Nicotinamide mononucleotide-specific adenylyltransferase (NMNAT)       |
| YCL048W              | SPS22              | Protein of unknown function                                            |
| YCL048W-A            |                    | Putative protein of unknown function                                   |
| YCL049C              |                    | Protein of unknown function                                            |
| YCL050C              | APA1               | AP4A phosphorylase                                                     |
| YCL051W              | LRE1               | Protein involved in control of cell wall structure and stress response |
| YCL052C              | PBN1               | Component of glycosylphosphatidylinositol-mannosyltransferase I        |
| YCL054W              | SPB1               | AdoMet-dependent methyltransferase                                     |



| Systematic gene name | Standard gene name | Gene description                                                       |
|----------------------|--------------------|------------------------------------------------------------------------|
| YCL055W              | KAR4               | Transcription factor required for response to pheromones               |
| YCL056C              | PEX34              | Protein that regulates peroxisome populations                          |
| YCL057C-A            | MIC10              | Conserved component of the MICOS complex                               |
| YCL057W              | PRD1               | Zinc metalloendopeptidase                                              |
| YCL058W-A            | ADF1               | Transcriptional repressor encoded by the FYV5 antisense strand         |
| YCL059C              | KRR1               | Nucleolar protein required for rRNA synthesis and ribosomal assembly   |
| YCL061C              | MRC1               | S-phase checkpoint protein required for DNA replication                |
| YCL063W              | VAC17              | Phosphoprotein involved in vacuole inheritance                         |
| YCL064C              | CHA1               | Catabolic L-serine (L-threonine) deaminase                             |
| YCL067C              | HMLALPHA2          | Silenced copy of ALPHA2 at HML                                         |
| YCL073C              | GEX1               | Proton:glutathione antiporter                                          |
| YCR002C              | CDC10              | Component of the septin ring, required for cytokinesis                 |
| YCR003W              | MRPL32             | Mitochondrial ribosomal protein of the large subunit                   |
| YCR004C              | YCP4               | Protein of unknown function                                            |
| YCR005C              | CIT2               | Citrate synthase                                                       |
| YCR007C              |                    | Putative integral membrane protein                                     |
| YCR008W              | SAT4               | Ser/Thr protein kinase involved in salt tolerance                      |
| YCR009C              | RVS161             | Amphiphysin-like lipid raft protein                                    |
| YCR010C              | ADY2               | Acetate transporter required for normal sporulation                    |
| YCR011C              | ADP1               | Putative ATP-dependent permease of the ABC transporter family          |
| YCR012W              | PGK1               | 3-phosphoglycerate kinase                                              |
| YCR014C              | POL4               | DNA polymerase IV                                                      |
| YCR015C              | CTO1 (Reserved)    | Putative protein of unknown function                                   |
| YCR016W              |                    | Putative protein of unknown function                                   |
| YCR017C              | CWH43              | Putative sensor/transporter protein involved in cell wall biogenesis   |
| YCR019W              | MAK32              | Protein necessary for stability of L-A dsRNA-containing particles      |
| YCR020C              | PET18              | Protein of unknown function                                            |
| YCR020C-A            | MAK31              | Non-catalytic subunit of N-terminal acetyltransferase of the NatC type |
| YCR020W-B            | HTL1               | Component of the RSC chromatin remodeling complex                      |
| YCR021C              | HSP30              | Negative regulator of the H(+)-ATPase Pma1p                            |
| YCR023C              |                    | Vacuolar membrane protein of unknown function                          |
| YCR024C              | SLM5               | Mitochondrial asparaginyl-tRNA synthetase                              |
| YCR024C-A            | PMP1               | Regulatory subunit for the plasma membrane H(+)-ATPase Pma1p           |
| YCR026C              | NPP1               | Nucleotide pyrophosphatase/phosphodiesterase                           |
| YCR027C              | RHB1               | Putative Rheb-related GTPase                                           |
| YCR028C              | FEN2               | Plasma membrane H+-pantothenate symporter                              |
| YCR028C-A            | RIM1               | ssDNA-binding protein essential for mitochondrial genome maintenance   |
| YCR030C              | SYP1               | Negative regulator of WASP-Arp23 complex                               |
| YCR031C              | RPS14A             | Protein component of the small (40S) ribosomal subunit                 |
| YCR032W              | BPH1               | Protein homologous to Chediak-Higashi syndrome and Beige proteins      |
| YCR033W              | SNT1               | Subunit of the Set3C deacetylase complex                               |
| YCR034W              | ELO2               | Fatty acid elongase, involved in sphingolipid biosynthesis             |
| YCR035C              | RRP43              | Exosome non-catalytic core component                                   |
| YCR036W              | RBK1               | Putative ribokinase                                                    |
| YCR037C              | PHO87              | Low-affinity inorganic phosphate (Pi) transporter                      |
| YCR038C              | BUD5               | GTP/GDP exchange factor for Rsr1p (Bud1p)                              |
| YCR042C              | TAF2               | TFIID subunit (150 kDa)                                                |
| YCR043C              |                    | Putative protein of unknown function                                   |

| Systematic gene name | Standard gene name | Gene description                                                     |
|----------------------|--------------------|----------------------------------------------------------------------|
| YCR044C              | PER1               | Protein of the endoplasmic reticulum                                 |
| YCR045C              | RRT12              | Probable subtilisin-family protease                                  |
| YCR046C              | IMG1               | Mitochondrial ribosomal protein of the large subunit                 |
| YCR047C              | BUD23              | Methyltransferase                                                    |
| YCR048W              | ARE1               | Acyl-CoA:sterol acyltransferase                                      |
| YCR051W              |                    | Putative protein of unknown function                                 |
| YCR052W              | RSC6               | Component of the RSC chromatin remodeling complex                    |
| YCR053W              | THR4               | Threonine synthase                                                   |
| YCR054C              | CTR86              | Essential protein of unknown function                                |
| YCR057C              | PWP2               | Conserved 90S pre-ribosomal component                                |
| YCR059C              | YIH1               | Negative regulator of eIF2 kinase Gcn2p                              |
| YCR060W              | TAH1               | Component of conserved R2TP complex (Rvb1-Rvb2-Tah1-Pih1)            |
| YCR061W              |                    | Protein of unknown function                                          |
| YCR063W              | BUD31              | Component of the SF3b subcomplex of the U2 snRNP                     |
| YCR065W              | HCM1               | Forkhead transcription factor                                        |
| YCR066W              | RAD18              | E3 ubiquitin ligase                                                  |
| YCR067C              | SED4               | Integral ER membrane protein that stimulates Sar1p GTPase activity   |
| YCR068W              | ATG15              | Lipase required for intravacuolar lysis of autophagic and Cvt bodies |
| YCR069W              | CPR4               | Peptidyl-prolyl cis-trans isomerase (cyclophilin)                    |
| YCR071C              | IMG2               | Mitochondrial ribosomal protein of the large subunit                 |
| YCR072C              | RSA4               | WD-repeat protein involved in ribosome biogenesis                    |
| YCR073C              | SSK22              | MAP kinase kinase kinase of HOG1 mitogen-activated signaling pathway |
| YCR073W-A            | SOL2               | Protein with a possible role in tRNA export                          |
| YCR075C              | ERS1               | Protein with similarity to human cystinosin                          |
| YCR075W-A            |                    | Putative protein of unknown function                                 |
| YCR076C              | FUB1               | Proteasome-binding protein                                           |
| YCR079W              | PTC6               | Mitochondrial type 2C protein phosphatase (PP2C)                     |
| YCR081W              | SRB8               | Subunit of the RNA polymerase II mediator complex                    |
| YCR082W              | AHC2               | Component of the ADA histone acetyltransferase complex               |
| YCR083W              | TRX3               | Mitochondrial thioredoxin                                            |
| YCR084C              | TUP1               | General repressor of transcription                                   |
| YCR086W              | CSM1               | Nucleolar protein that mediates homolog segregation during meiosis I |
| YCR087C-A            |                    | Putative protein of unknown function                                 |
| YCR088W              | ABP1               | Actin-binding protein of the cortical actin cytoskeleton             |
| YCR090C              |                    | Putative protein of unknown function                                 |
| YCR091W              | KIN82              | Putative serine/threonine protein kinase                             |
| YCR092C              | MSH3               | Mismatch repair protein                                              |
| YCR093W              | CDC39              | Component of the CCR4-NOT1 core complex                              |
| YCR094W              | CDC50              | Endosomal protein that interacts with phospholipid flippase Drs2p    |
| YCR095C              | OCA4               | Cytoplasmic protein required for replication of Brome mosaic virus   |
| YCR098C              | GIT1               | Plasma membrane permease                                             |
| YCR099C              |                    | Putative protein of unknown function                                 |
| YCR100C              |                    | Putative protein of unknown function                                 |

**Table S3.** Single nucleotide variations.

| Location    | Strains |      |      |      |     |      |      |      |     |     | Nucleotide change ori/mut | Effect                                                          | Systematic gene name        | Codon change | Amino acid change | Five nucleotides context | trinucleotide context |
|-------------|---------|------|------|------|-----|------|------|------|-----|-----|---------------------------|-----------------------------------------------------------------|-----------------------------|--------------|-------------------|--------------------------|-----------------------|
|             | AAC     | M715 | MH23 | MH34 | A64 | B130 | B184 | C120 | D5  | F83 |                           |                                                                 |                             |              |                   |                          |                       |
| chr0:12756  |         | SNV  | SNV  | SNV  | SNV | SNV  | SNV  | SNV  | SNV | SNV | G/A                       | INTERGENIC                                                      |                             |              |                   | atGaa                    | tGa                   |
| chr1:49928  |         |      |      | SNV  | SNV | SNV  | SNV  | SNV  | SNV |     | C/T                       | NON_SYNONYMOUS_CODING                                           | YAL051W                     | Cca/Tca      | P/S               | atCca                    | tCc                   |
| chr1:83437  |         |      |      |      |     |      |      |      | SNV |     | G/A                       | SYNONYMOUS_CODING                                               | YAL032C                     | aaC/aaT      | N/N               | taGtt                    | aGt                   |
| chr1:121091 |         |      |      |      | SNV |      |      |      |     |     | C/T                       | NON_SYNONYMOUS_CODING                                           | YAL017W                     | Cca/Tca      | P/S               | ccCca                    | cCc                   |
| chr2:32778  |         |      |      |      |     |      |      |      | SNV |     | C/T                       | SYNONYMOUS_CODING                                               | YBL099W                     | tcC/tcT      | S/S               | tcCat                    | cCa                   |
| chr2:123579 |         |      |      | SNV  | SNV | SNV  | SNV  | SNV  | SNV |     | C/T                       | NON_SYNONYMOUS_CODING                                           | YBL047C                     | Gaa/Aaa      | E/K               | ttCcc                    | tCc                   |
| chr2:162938 |         | SNV  |      |      |     |      |      |      |     |     | C/A                       | UPSTREAM: 387 bases, DOWNSTREAM: 961 bases, UPSTREAM: 492 bases | YBL028C, YBL029W, YBR084C-A |              |                   | taCgt                    | aCg                   |
| chr2:182401 |         |      |      |      |     |      |      |      | SNV |     | C/T                       | NON_SYNONYMOUS_CODING                                           | YBL017C                     | aGa/aAa      | R/K               | ttCtt                    | tCt                   |
| chr2:251844 |         |      |      |      |     |      |      |      |     | SNV | G/A                       | UPSTREAM: 196 bases                                             | YBR007C                     |              |                   | taGaa                    | aGa                   |
| chr2:332214 |         |      |      |      |     |      | SNV  |      |     |     | C/T                       | SYNONYMOUS_CODING                                               | YBR050C                     | gcG/gcA      | A/A               | ctCgc                    | tCg                   |
| chr2:460650 |         |      |      |      |     |      | SNV  |      |     |     | C/T                       | SYNONYMOUS_CODING                                               | YBR114W                     | ttC/tT       | F/F               | ttCca                    | tCc                   |
| chr2:645838 |         |      |      |      |     |      |      | SNV  |     |     | G/A                       | NON_SYNONYMOUS_CODING                                           | YBR213W                     | Gaa/Aaa      | E/K               | gaGaa                    | aGa                   |
| chr2:707966 |         |      |      |      |     |      |      |      | SNV |     | G/A                       | NON_SYNONYMOUS_CODING                                           | YBR247C                     | Cgt/Tgt      | R/C               | acGaa                    | cGa                   |
| chr2:762058 |         |      |      |      |     |      |      | SNV  |     |     | G/A                       | SYNONYMOUS_CODING                                               | YBR281C                     | ttC/tT       | F/F               | gaGaa                    | aGa                   |
| chr3:19164  |         |      | SNV  |      |     |      |      |      |     | SNV | C/T                       | SYNONYMOUS_CODING                                               | YCL061C                     | gaG/gaA      | E/E               | tcCtc                    | cCt                   |
| chr3:44524  |         |      | SNV  |      |     |      |      |      |     | SNV | A/T                       | NON_SYNONYMOUS_CODING                                           | YCL045C                     | tTc/tAc      | F/Y               | tgAaa                    | gAa                   |
| chr3:68490  |         |      |      | SNV  | SNV | SNV  | SNV  | SNV  | SNV |     | G/A                       | NON_SYNONYMOUS_CODING                                           | YCL029C                     | tCg/tTg      | S/L               | ccGat                    | cGa                   |
| chr3:180425 |         |      |      | SNV  | SNV | SNV  | SNV  | SNV  | SNV |     | C/T                       | UPSTREAM: 943 bases                                             | YCR032W                     |              |                   | atCga                    | tCg                   |
| chr4:85150  |         |      |      |      |     |      | SNV  |      |     |     | G/A                       | NON_SYNONYMOUS_CODING                                           | YDL209C                     | cCa/cTa      | P/L               | ctGga                    | tGg                   |
| chr4:85151  |         |      |      |      |     |      | SNV  |      |     |     | G/A                       | NON_SYNONYMOUS_CODING                                           | YDL209C                     | Cca/Tea      | P/S               | tgGaa                    | gGa                   |
| chr4:110630 |         | SNV  | SNV  | SNV  | SNV | SNV  | SNV  | SNV  | SNV | SNV | C/T                       | NON_SYNONYMOUS_CODING                                           | YDL194W                     | tCt/tTt      | S/F               | gtCta                    | tCt                   |
| chr4:192829 |         |      |      |      | SNV |      |      |      |     |     | G/A                       | SYNONYMOUS_CODING                                               | YDL146W                     | ttG/tTA      | L/L               | ttGgc                    | tGg                   |
| chr4:192830 |         |      |      |      | SNV |      |      |      |     |     | G/A                       | NON_SYNONYMOUS_CODING                                           | YDL146W                     | Gct/Act      | A/T               | tgGct                    | gGc                   |
| chr4:199553 |         |      |      |      | SNV |      |      |      |     |     | C/T                       | SYNONYMOUS_CODING                                               | YDL143W                     | atC/atT      | I/I               | atCtg                    | tCt                   |
| chr4:231957 |         |      |      |      |     |      |      | SNV  |     |     | C/T                       | SYNONYMOUS_CODING                                               | YDL128W                     | gtC/gtT      | V/V               | gtCca                    | tCc                   |
| chr4:266882 |         |      |      |      |     |      |      |      | SNV |     | C/T                       | SYNONYMOUS_CODING                                               | YDL108W                     | Ctg/Ttg      | L/L               | ttCtg                    | tCt                   |
| chr4:277803 |         |      |      |      |     | SNV  |      |      |     |     | G/A                       | SYNONYMOUS_CODING                                               | YDL102W                     | ctG/ctA      | L/L               | ctGag                    | tGa                   |
| chr4:305061 |         |      | SNV  |      |     |      |      |      |     | SNV | C/T                       | SYNONYMOUS_CODING                                               | YDL084W                     | ttC/tT       | F/F               | ttCaa                    | tCa                   |
| chr4:340416 |         |      |      |      | SNV |      |      |      |     |     | C/T                       | UPSTREAM: 107 bases, UPSTREAM: 714 bases                        | YDL060W, YDL061C            |              |                   | ctCat                    | tCa                   |
| chr4:346549 |         |      |      | SNV  | SNV | SNV  | SNV  | SNV  | SNV |     | C/T                       | NON_SYNONYMOUS_CODING                                           | YDL058W                     | tCt/tTt      | S/F               | ttCtc                    | tCt                   |
| chr4:352412 |         |      |      | SNV  | SNV | SNV  | SNV  | SNV  | SNV |     | C/T                       | NON_SYNONYMOUS_CODING                                           | YDL056W                     | cCe/cTc      | P/L               | tcCct                    | cCc                   |
| chr4:414634 |         |      | SNV  |      |     |      |      |      |     | SNV | G/A                       | NON_SYNONYMOUS_CODING                                           | YDL020C                     | Cca/Tea      | P/S               | tgGaa                    | gGa                   |
| chr4:439286 |         |      |      |      |     |      | SNV  |      |     |     | A/T                       | NON_SYNONYMOUS_CODING                                           | YDL006W                     | tAt/tTt      | Y/F               | atAta                    | tAt                   |
| chr4:483697 |         |      |      |      |     |      |      |      | SNV |     | G/A                       | SYNONYMOUS_CODING                                               | YDR019C                     | ctC/ctT      | L/L               | aaGag                    | aGa                   |
| chr4:585289 |         |      |      | SNV  | SNV | SNV  | SNV  | SNV  | SNV |     | G/A                       | NON_SYNONYMOUS_CODING                                           | YDR069C                     | tCa/tTa      | S/L               | ttGat                    | tGa                   |

| Location     | Strains |      |      |      |     |      |      |      |     |     | Nucleotide change ori/mut | Effect                                      | Systematic gene name | Codon change | Amino acid change | Five nucleotides context | trinucleotide context |
|--------------|---------|------|------|------|-----|------|------|------|-----|-----|---------------------------|---------------------------------------------|----------------------|--------------|-------------------|--------------------------|-----------------------|
|              | AAC     | M715 | MH23 | MH34 | A64 | B130 | B184 | C120 | D5  | F83 |                           |                                             |                      |              |                   |                          |                       |
| chr4:585398  |         |      |      | SNV  | SNV | SNV  | SNV  | SNV  | SNV |     | G/A                       | NON_SYNONYMOUS_CODING                       | YDR069C              | Ctt/Ttt      | L/F               | aaGat                    | aGa                   |
| chr4:595180  |         |      |      | SNV  | SNV | SNV  | SNV  | SNV  | SNV |     | C/T                       | NON_SYNONYMOUS_CODING                       | YDR074W              | Cgt/Tgt      | R/C               | ttCgt                    | tCg                   |
| chr4:642292  |         |      |      |      |     |      | SNV  |      |     |     | G/A                       | NON_SYNONYMOUS_CODING                       | YDR097C              | tCv/tTt      | S/F               | aaGag                    | aGa                   |
| chr4:669439  |         |      |      |      |     | SNV  |      |      |     |     | C/T                       | SYNONYMOUS_CODING                           | YDR110W              | ttC/ttT      | F/F               | ttCgt                    | tCg                   |
| chr4:711836  |         |      |      |      | SNV |      |      |      |     |     | A/G                       | SYNONYMOUS_CODING                           | YDR132C              | ttT/ttC      | F/F               | aaAaa                    | aAa                   |
| chr4:966359  |         |      |      | SNV  | SNV | SNV  | SNV  | SNV  | SNV |     | G/A                       | SYNONYMOUS_CODING                           | YDR255C              | agC/agT      | S/S               | aaGct                    | aGc                   |
| chr4:1052323 |         |      |      | SNV  | SNV | SNV  | SNV  | SNV  | SNV |     | G/A                       | STOP_GAINED                                 | YDR295C              | Caa/Taa      | Q/*               | ttGag                    | tGa                   |
| chr4:1121403 |         |      |      |      |     |      |      |      | SNV |     | G/A                       | NON_SYNONYMOUS_CODING                       | YDR326C              | tCc/tTc      | S/F               | tgGaa                    | gGa                   |
| chr4:1136687 |         |      |      |      |     |      |      | SNV  |     |     | C/T                       | UPSTREAM: 741 bases                         | YDR334W              |              |                   | ttCat                    | tCa                   |
| chr4:1138124 |         |      |      |      |     |      |      | SNV  |     |     | G/A                       | NON_SYNONYMOUS_CODING                       | YDR334W              | Gat/Aat      | D/N               | aaGat                    | aGa                   |
| chr4:1200718 |         |      |      |      |     |      |      | SNV  |     |     | C/T                       | UPSTREAM: 440 bases, UPSTREAM: 62 bases     | YDR363W-A, tRNA      |              |                   | atCtt                    | tCt                   |
| chr4:1219453 |         |      |      |      | SNV |      |      |      |     |     | G/A                       | NON_SYNONYMOUS_CODING                       | YDR371W              | aGa/aAa      | R/K               | taGaa                    | aGa                   |
| chr4:1223310 |         |      |      |      | SNV |      |      |      |     |     | G/T                       | NON_SYNONYMOUS_CODING                       | YDR374C              | tCc/tAc      | S/Y               | agGaa                    | gGa                   |
| chr4:1223393 |         |      |      |      | INS |      |      |      |     |     | */+A                      | FRAME_SHIFT, 1 bp insert                    | YDR374C              |              |                   | aaGta                    | aGt                   |
| chr4:1223394 |         |      |      |      | SNV |      |      |      |     |     | T/C                       | NON_SYNONYMOUS_CODING                       | YDR374C              | tAc/tGc      | Y/C               | agTaa                    | gTa                   |
| chr4:1248040 |         |      |      |      |     | SNV  |      |      |     |     | C/T                       | NON_SYNONYMOUS_CODING                       | YDR387C              | Gaa/Aaa      | E/K               | ttCgt                    | tCg                   |
| chr4:1275639 |         |      |      |      | SNV |      |      |      |     |     | G/A                       | DOWNSTREAM: 404 bases, DOWNSTREAM: 38 bases | YDR403W, YDR404C     |              |                   | aaGgc                    | aGg                   |
| chr4:1284344 |         |      |      |      | SNV |      |      |      |     |     | A/G                       | NON_SYNONYMOUS_CODING                       | YDR407C              | Ttt/Ctt      | F/L               | aaAat                    | aAa                   |
| chr4:1343273 |         |      |      |      |     |      |      | SNV  |     |     | G/A                       | DOWNSTREAM: 1 bases, DOWNSTREAM: 275 bases  | YDR440W, YDR441C     |              |                   | gaGgc                    | aGg                   |
| chr4:1343274 |         |      |      |      |     |      |      | SNV  |     |     | G/A                       | DOWNSTREAM: 2 bases, DOWNSTREAM: 274 bases  | YDR440W, YDR441C     |              |                   | agGca                    | gGc                   |
| chr4:1343864 |         |      |      |      |     |      |      | SNV  |     |     | G/A                       | NON_SYNONYMOUS_CODING                       | YDR441C              | tCc/tTc      | S/F               | ggGat                    | gGa                   |
| chr4:1344340 |         |      |      |      |     |      |      | SNV  |     |     | G/A                       | DOWNSTREAM: 365 bases UPSTREAM: 247 bases   | YDR443C, YDR441C     |              |                   | acGaa                    | cGa                   |
| chr4:1378469 |         |      |      |      |     | SNV  |      |      |     |     | C/T                       | NON_SYNONYMOUS_CODING                       | YDR457W              | tCc/tTc      | S/F               | ttCca                    | tCc                   |
| chr4:1380160 |         |      |      |      |     | SNV  |      |      |     |     | C/T                       | NON_SYNONYMOUS_CODING                       | YDR458C              | aGa/aAa      | R/K               | ctCtt                    | tCt                   |
| chr4:1381362 |         |      |      |      |     | SNV  |      |      |     |     | C/A                       | NON_SYNONYMOUS_CODING                       | YDR459C              | aGt/aTt      | S/I               | caCta                    | aCt                   |
| chr4:1381372 |         |      |      |      |     | SNV  |      |      |     |     | C/T                       | NON_SYNONYMOUS_CODING                       | YDR459C              | Ggt/Agt      | G/S               | acCag                    | cCa                   |
| chr4:1411478 |         |      | SNV  |      |     |      |      |      | SNV |     | C/T                       | SYNONYMOUS_CODING                           | YDR477W              | caC/caT      | H/H               | caCca                    | aCc                   |
| chr4:1411479 |         |      | SNV  |      |     |      |      |      | SNV |     | C/T                       | NON_SYNONYMOUS_CODING                       | YDR477W              | Cac/Tac      | H/Y               | acCac                    | cCa                   |
| chr4:1481916 |         |      |      |      |     | SNV  |      |      |     |     | G/A                       | SYNONYMOUS_CODING                           | YDR520C              | caC/caT      | H/H               | tgGtg                    | gGt                   |
| chr4:1517541 |         |      |      |      |     | SNV  |      |      |     |     | G/A                       | DOWNSTREAM: 756 bases                       | YDR541C              |              |                   | taGaa                    | aGa                   |
| chr5:35587   |         |      |      |      |     | SNV  |      |      |     |     | G/A                       | NON_SYNONYMOUS_CODING                       | YEL061C              | Ctt/Ttt      | L/F               | aaGag                    | aGa                   |
| chr5:75858   |         |      |      |      | SNV |      |      |      |     |     | G/A                       | UPSTREAM: 279 bases DOWNSTREAM: 343 bases   | YEL040W, YEL041W     |              |                   | agGga                    | gGg                   |
| chr5:75859   |         |      |      |      | SNV |      |      |      |     |     | G/A                       | UPSTREAM: 278 bases DOWNSTREAM: 344 bases   | YEL040W, YEL041W     |              |                   | ggGaa                    | gGa                   |
| chr5:75979   |         |      |      |      | SNV |      |      |      |     |     | G/A                       | UPSTREAM: 158 bases DOWNSTREAM: 464 bases   | YEL040W, YEL041W     |              |                   | gtGga                    | tGg                   |

| Location    | Strains |      |      |      |     |      |      |      |     |     | Nucleotide change ori/mut | Effect                                     | Systematic gene name | Codon change | Amino acid change | Five nucleotides context | trinucleotide context |
|-------------|---------|------|------|------|-----|------|------|------|-----|-----|---------------------------|--------------------------------------------|----------------------|--------------|-------------------|--------------------------|-----------------------|
|             | AAC     | M715 | MH23 | MH34 | A64 | B130 | B184 | C120 | D5  | F83 |                           |                                            |                      |              |                   |                          |                       |
| chr5:96599  |         |      | SNV  |      |     |      |      |      |     | SNV | G/A                       | UPSTREAM: 713 bases                        | YEL029C              |              |                   | atGaa                    | tGa                   |
| chr5:135270 |         |      |      |      |     |      |      |      |     | SNV | C/T                       | INTERGENIC                                 |                      |              |                   | ttCtt                    | tCt                   |
| chr5:181139 |         |      |      | SNV  | SNV | SNV  | SNV  | SNV  | SNV |     | C/T                       | SYNONYMOUS_CODING                          | YER014W              | ttC/ttT      | F/F               | ttCag                    | tCa                   |
| chr5:198811 |         |      | SNV  |      |     |      |      |      |     | SNV | G/A                       | SYNONYMOUS_CODING                          | YER022W              | ttG/ttA      | L/L               | ttGaa                    | tGa                   |
| chr5:218967 |         |      |      |      |     |      |      |      |     | SNV | G/A                       | SYNONYMOUS_CODING                          | YER033C              | Ctg/Ttg      | L/L               | caGag                    | aGa                   |
| chr5:239830 |         |      |      |      | SNV |      |      |      |     |     | C/T                       | SYNONYMOUS_CODING                          | YER045C              | aaG/aaA      | K/K               | tcCtt                    | cCt                   |
| chr5:278493 |         |      |      |      |     |      |      |      |     | SNV | C/T                       | NON_SYNONYMOUS_CODING                      | YER062C              | Gaa/Aaa      | E/K               | ttCaa                    | tCa                   |
| chr5:292430 |         |      |      |      |     |      |      |      |     | SNV | G/A                       | SYNONYMOUS_CODING                          | YER068W              | caG/caA      | Q/Q               | caGaa                    | aGa                   |
| chr5:307408 |         |      |      |      | SNV |      |      |      |     |     | C/T                       | NON_SYNONYMOUS_CODING                      | YER075C              | Gat/Aat      | D/N               | atCat                    | tCa                   |
| chr5:308186 |         |      | SNV  |      |     |      |      |      |     | SNV | G/A                       | SYNONYMOUS_CODING                          | YER075C              | ttC/ttT      | F/F               | ggGaa                    | gGa                   |
| chr5:409300 |         |      |      | SNV  | SNV | SNV  | SNV  | SNV  | SNV |     | C/T                       | NON_SYNONYMOUS_CODING                      | YER125W              | Cca/Tca      | P/S               | ctCca                    | tCc                   |
| chr5:420847 |         |      |      |      |     |      |      |      |     | SNV | G/A                       | UPSTREAM: 361 bases                        | YER130C              |              |                   | ttGaa                    | tGa                   |
| chr5:422289 |         |      |      |      |     | SNV  |      |      |     |     | C/T                       | NON_SYNONYMOUS_CODING                      | YER131W              | Cca/Tca      | P/S               | gaCca                    | aCc                   |
| chr5:422290 |         |      |      |      |     | SNV  |      |      |     |     | C/T                       | NON_SYNONYMOUS_CODING                      | YER131W              | cCa/cTa      | P/L               | acCaa                    | cCa                   |
| chr5:434293 |         |      |      | SNV  | SNV | SNV  | SNV  | SNV  | SNV |     | C/T                       | UPSTREAM: 377 bases                        | tRNA                 |              |                   | atCtt                    | tCt                   |
| chr5:452458 |         |      |      |      | SNV |      |      |      |     |     | C/T                       | SYNONYMOUS_CODING                          | YER141W              | ttC/ttT      | F/F               | ttCct                    | tCc                   |
| chr5:452877 |         |      |      |      | SNV |      |      |      |     |     | T/C                       | NON_SYNONYMOUS_CODING                      | YER141W              | tTg/tCg      | L/S               | ttTgg                    | tTg                   |
| chr6:159482 |         |      |      |      |     |      |      |      |     | SNV | C/T                       | STOP_GAINED                                | YFR008W              | Caa/Taa      | Q/*               | ctCaa                    | tCa                   |
| chr6:181966 |         |      |      |      |     |      |      |      |     | SNV | C/T                       | UPSTREAM: 131 bases                        | YFR017C              |              |                   | ctCag                    | tCa                   |
| chr6:190455 |         |      |      |      | SNV |      |      |      |     |     | G/A                       | DOWNSTREAM: 166 bases, DOWNSTREAM: 6 bases | YFR019W, tRNA        |              |                   | gaGaa                    | aGa                   |
| chr7:10508  |         |      |      |      |     | SNV  |      |      |     |     | T/C                       | UPSTREAM: 237 bases                        | YGL258W              |              |                   | ccTac                    | cTa                   |
| chr7:14391  |         |      |      |      | SNV |      |      |      |     |     | C/T                       | UPSTREAM: 411 bases, UPSTREAM: 591 bases   | YGL256W, YGL257C     |              |                   | ctCca                    | tCc                   |
| chr7:14809  |         |      |      |      | SNV |      |      |      |     |     | C/T                       | NON_SYNONYMOUS_CODING                      | YGL256W              | tCc/tTc      | S/F               | ttCcg                    | tCc                   |
| chr7:56921  |         |      |      |      |     | SNV  |      |      |     |     | G/A                       | SYNONYMOUS_CODING                          | YGL234W              | caG/caA      | Q/Q               | caGat                    | aGa                   |
| chr7:62380  |         |      |      | INS  | INS | INS  | INS  | INS  | INS |     | */+GA                     | FRAME_SHIFT, 2 bp insert                   | YGL232W              |              |                   | gtTaa                    | tTa                   |
| chr7:118523 |         |      |      |      | SNV |      |      |      |     |     | C/T                       | NON_SYNONYMOUS_CODING                      | YGL201C              | Gag/Aag      | E/K               | ctCta                    | tCt                   |
| chr7:118585 |         |      |      |      | SNV |      |      |      |     |     | C/T                       | NON_SYNONYMOUS_CODING                      | YGL201C              | aGg/aAg      | R/K               | gcCtt                    | cCt                   |
| chr7:213242 |         |      |      | SNV  | SNV | SNV  | SNV  | SNV  | SNV |     | G/A                       | NON_SYNONYMOUS_CODING                      | YGL156W              | Gaa/Aaa      | E/K               | atGaa                    | tGa                   |
| chr7:260149 |         |      |      | SNV  | SNV | SNV  | SNV  | SNV  | SNV |     | C/T                       | STOP_GAINED                                | YGL133W              | Cga/Tga      | R/*               | gtCga                    | tCg                   |
| chr7:289240 |         |      |      | SNV  | SNV | SNV  | SNV  | SNV  | SNV |     | A/T                       | SYNONYMOUS_CODING                          | YGL117W              | atA/atT      | I/I               | atAga                    | tAg                   |
| chr7:306189 |         |      |      |      |     | SNV  |      |      |     |     | G/A                       | NON_SYNONYMOUS_CODING                      | YGL107C              | Ctt/Ttt      | L/F               | aaGaa                    | aGa                   |
| chr7:328295 |         |      |      |      | SNV |      |      |      |     |     | C/T                       | UPSTREAM: 465 bases, DOWNSTREAM: 756 bases | tRNA, YGL095C        |              |                   | ttCca                    | tCc                   |
| chr7:344703 |         |      |      |      |     |      |      |      |     | SNV | C/T                       | NON_SYNONYMOUS_CODING                      | YGL090W              | tCc/tTc      | S/F               | atCcg                    | tCc                   |
| chr7:344704 |         |      |      |      |     |      |      |      |     | SNV | C/T                       | SYNONYMOUS_CODING                          | YGL090W              | tcC/tcT      | S/S               | tcCgg                    | cCg                   |
| chr7:368737 |         |      |      |      |     |      |      |      |     | SNV | C/T                       | UPSTREAM: 193 bases, UPSTREAM: 472 bases   | YGL073W, YGL075C     |              |                   | ttCac                    | tCa                   |
| chr7:369204 |         |      |      |      |     |      |      |      |     | SNV | T/C                       | NON_SYNONYMOUS_CODING                      | YGL073W              | tTa/tCa      | L/S               | ttTag                    | tTa                   |
| chr7:369279 |         |      |      |      |     |      |      |      |     | SNV | C/T                       | NON_SYNONYMOUS_CODING                      | YGL073W              | cCt/cTt      | P/L               | tcCta                    | cCt                   |

| Location     | Strains |      |      |      |     |      |      |      |     |     | Nucleotide change ori/mut | Effect                                     | Systematic gene name | Codon change | Amino acid change | Five nucleotides context | trinucleotide context |
|--------------|---------|------|------|------|-----|------|------|------|-----|-----|---------------------------|--------------------------------------------|----------------------|--------------|-------------------|--------------------------|-----------------------|
|              | AAC     | M715 | MH23 | MH34 | A64 | B130 | B184 | C120 | D5  | F83 |                           |                                            |                      |              |                   |                          |                       |
| chr7:416666  |         |      | SNV  |      |     |      |      |      |     | SNV | C/T                       | NON_SYNONYMOUS_CODING                      | YGL044C              | Gat/Aat      | D/N               | atCtc                    | tCt                   |
| chr7:588482  |         | SNV  | SNV  | SNV  | SNV | SNV  | SNV  | SNV  | SNV | SNV | G/A                       | NON_SYNONYMOUS_CODING                      | YGR047C              | Ctt/Ttt      | L/F               | aaGaa                    | aGa                   |
| chr7:594130  |         |      |      |      |     | SNV  |      |      |     |     | C/T                       | SYNONYMOUS_CODING                          | YGR052W              | ttC/ttT      | F/F               | ttCga                    | tCg                   |
| chr7:646593  |         | SNV  |      |      |     |      |      |      |     |     | G/T                       | NON_SYNONYMOUS_CODING                      | YGR083C              | agC/agA      | S/R               | tcGct                    | cGc                   |
| chr7:703922  |         |      |      |      | INS |      |      |      |     |     | */+A                      | FRAME_SHIFT, 1 bp insert                   | YGR108W              |              |                   | aaAgg                    | aAg                   |
| chr7:732569  |         |      |      | SNV  | SNV | SNV  | SNV  | SNV  | SNV |     | C/T                       | NON_SYNONYMOUS_CODING                      | YGR121C              | Ggt/Agt      | G/S               | acCga                    | cCg                   |
| chr7:859863  |         |      |      |      | SNV |      |      |      |     |     | C/T                       | NON_SYNONYMOUS_CODING                      | YGR184C              | Gat/Aat      | D/N               | atCgc                    | tCg                   |
| chr7:867105  |         |      | SNV  |      |     |      |      |      |     | SNV | G/A                       | NON_SYNONYMOUS_CODING                      | YGR185C              | Ctt/Ttt      | L/F               | aaGaa                    | aGa                   |
| chr7:867888  |         |      |      |      |     | SNV  |      |      |     |     | C/T                       | NON_SYNONYMOUS_CODING                      | YGR186W              | cCc/cTc      | P/L               | tcCct                    | cCc                   |
| chr7:903295  |         |      |      | SNV  | SNV | SNV  | SNV  | SNV  | SNV |     | G/A                       | NON_SYNONYMOUS_CODING                      | YGR202C              | tCa/tTa      | S/L               | ctGat                    | tGa                   |
| chr7:976412  |         |      |      |      |     | SNV  |      |      |     |     | G/A                       | UPSTREAM: 690 bases, UPSTREAM: 65 bases    | YGR243W,<br>YGR241C  |              |                   | ttGat                    | tGa                   |
| chr7:983701  |         |      | SNV  |      |     |      |      |      |     | SNV | G/A                       | NON_SYNONYMOUS_CODING                      | YGR246C              | gCt/gTt      | A/V               | taGcc                    | aGc                   |
| chr7:985625  |         |      |      |      | SNV |      |      |      |     |     | G/A                       | DOWNSTREAM: 372 bases, UPSTREAM: 114 bases | YGR247W,<br>YGR248W  |              |                   | gcGaa                    | cGa                   |
| chr7:1001853 |         |      | SNV  |      |     |      |      |      |     | SNV | G/A                       | SYNONYMOUS_CODING                          | YGR254W              | ttG/ttA      | L/L               | ttGgt                    | tGg                   |
| chr7:1008542 |         |      |      |      | SNV |      |      |      |     |     | A/T                       | NON_SYNONYMOUS_CODING                      | YGR258C              | gTv/gAt      | V/D               | aaAct                    | aAc                   |
| chr7:1060822 |         |      |      |      |     |      | SNV  |      |     |     | A/G                       | NON_SYNONYMOUS_CODING                      | YGR284C              | tTa/tCa      | L/S               | ttAat                    | tAa                   |
| chr8:17521   |         | SNV  | SNV  | SNV  | SNV | SNV  | SNV  | SNV  | SNV | SNV | A/G                       | NON_SYNONYMOUS_CODING                      | YHL038C              | aTg/aCg      | M/T               | tcAtg                    | cAt                   |
| chr8:32631   |         |      |      | SNV  | SNV | SNV  | SNV  | SNV  | SNV |     | G/A                       | NON_SYNONYMOUS_CODING                      | YHL031C              | tCt/tTt      | S/F               | aaGac                    | aGa                   |
| chr8:46429   |         |      |      |      | SNV |      |      |      |     |     | G/A                       | STOP_GAINED                                | YHL026C              | Caa/Taa      | Q/*               | ttGat                    | tGa                   |
| chr8:58567   |         |      |      |      |     |      |      | SNV  |     |     | G/A                       | SYNONYMOUS_CODING                          | YHL021C              | Ctg/Ttg      | L/L               | caGga                    | aGg                   |
| chr8:58626   |         |      |      |      |     |      |      | SNV  |     |     | G/A                       | NON_SYNONYMOUS_CODING                      | YHL021C              | tCg/tTg      | S/L               | gcGaa                    | cGa                   |
| chr8:58744   |         |      |      |      |     |      |      | SNV  |     |     | G/A                       | NON_SYNONYMOUS_CODING                      | YHL021C              | Cct/Tct      | P/S               | agGag                    | gGa                   |
| chr8:77374   |         |      |      |      |     | SNV  |      |      |     |     | G/A                       | NON_SYNONYMOUS_CODING                      | YHL009C              | Ctt/Ttt      | L/F               | aaGat                    | aGa                   |
| chr8:102923  |         |      |      |      | SNV |      |      |      |     |     | T/C                       | SYNONYMOUS_CODING                          | YHR002W              | ttT/ttC      | F/F               | ttTaa                    | tTa                   |
| chr8:114325  |         |      |      |      |     |      |      | SNV  |     |     | G/A                       | NON_SYNONYMOUS_CODING                      | YHR007C              | cCa/cTa      | P/L               | gtGga                    | tGg                   |
| chr8:117651  |         |      |      |      |     |      |      |      |     | SNV | T/A                       | NON_SYNONYMOUS_CODING                      | YHR009C              | gAt/gTt      | D/V               | caTct                    | aTc                   |
| chr8:170565  |         |      |      | SNV  | SNV | SNV  | SNV  | SNV  | SNV |     | G/A                       | NON_SYNONYMOUS_CODING                      | YHR034C              | tCc/tTc      | S/F               | cgGag                    | gGa                   |
| chr8:170665  |         |      |      | SNV  | SNV | SNV  | SNV  | SNV  | SNV |     | G/A                       | NON_SYNONYMOUS_CODING                      | YHR034C              | Ccg/Tcg      | P/S               | cgGgt                    | gGg                   |
| chr8:170666  |         |      |      | SNV  | SNV | SNV  | SNV  | SNV  | SNV |     | G/A                       | SYNONYMOUS_CODING                          | YHR034C              | gaC/gaT      | D/D               | ggGtc                    | gGt                   |
| chr8:193820  |         |      | SNV  |      |     |      |      |      |     | SNV | G/A                       | NON_SYNONYMOUS_CODING                      | YHR047C              | Cca/Tca      | P/S               | tgGat                    | gGa                   |
| chr8:272959  |         |      |      |      |     |      |      | SNV  |     |     | G/A                       | DOWNSTREAM: 82 bases                       | YHR086W              |              |                   | ttGta                    | tGt                   |
| chr8:443915  |         |      |      |      |     |      |      | SNV  |     |     | T/C                       | SYNONYMOUS_CODING                          | YHR172W              | ctT/ctC      | L/L               | ctTta                    | tTt                   |
| chr8:487581  |         |      | SNV  |      |     |      |      |      |     | SNV | C/T                       | NON_SYNONYMOUS_CODING                      | YHR197W              | aCt/aTt      | T/I               | caCta                    | aCt                   |
| chr8:515330  |         |      |      | SNV  | SNV | SNV  | SNV  | SNV  | SNV |     | C/T                       | UPSTREAM: 343 bases                        | YHR210C              |              |                   | taCcc                    | aCc                   |
| chr9:96486   |         |      |      |      |     |      |      |      |     | SNV | C/T                       | UPSTREAM: 114 bases, UPSTREAM: 842 bases   | YIL135C,<br>YIL134W  |              |                   | taCtg                    | aCt                   |
| chr9:109175  |         |      |      | SNV  | SNV | SNV  | SNV  | SNV  | SNV |     | G/A                       | SYNONYMOUS_CODING                          | YIL129C              | atC/atT      | I/I               | acGat                    | cGa                   |

| Location     | Strains |      |      |      |     |      |      |      |     |     | Nucleotide change ori/mut | Effect                                                           | Systematic gene name   | Codon change | Amino acid change | Five nucleotides context | trinucleotide context |
|--------------|---------|------|------|------|-----|------|------|------|-----|-----|---------------------------|------------------------------------------------------------------|------------------------|--------------|-------------------|--------------------------|-----------------------|
|              | AAC     | M715 | MH23 | MH34 | A64 | B130 | B184 | C120 | D5  | F83 |                           |                                                                  |                        |              |                   |                          |                       |
| chr9:142457  |         |      | SNV  |      |     |      |      |      |     | SNV | G/A                       | UPSTREAM: 455 bases, UPSTREAM: 904 bases                         | YIL116W, YIL117C       |              |                   | ttGag                    | tGa                   |
| chr9:175291  |         |      |      |      | INS |      |      |      |     |     | */+A                      | DOWNSTREAM: 17 bases, UPSTREAM: 403 bases, DOWNSTREAM: 187 bases | YIL101C, YIL102C, tRNA |              |                   | aaAtg                    | aAt                   |
| chr9:183945  |         |      |      |      | SNV |      |      |      |     |     | C/T                       | NON_SYNONYMOUS_CODING                                            | YIL095W                | cCa/cTa      | P/L               | tcCac                    | cCa                   |
| chr9:329312  |         |      |      |      | SNV |      |      |      |     |     | C/T                       | SYNONYMOUS_CODING                                                | YIL013C                | aaG/aaA      | K/K               | gcCtt                    | cCt                   |
| chr9:334662  |         |      |      | SNV  | SNV | SNV  | SNV  | SNV  | SNV |     | C/T                       | NON_SYNONYMOUS_CODING                                            | YIL011W                | tCt/tTt      | S/F               | ttCtt                    | tCt                   |
| chr9:367955  |         |      |      |      |     |      |      |      | SNV |     | G/A                       | NON_SYNONYMOUS_CODING                                            | YIR006C                | tCa/tTa      | S/L               | ttGaa                    | tGa                   |
| chr9:370759  |         |      |      | SNV  | SNV | SNV  | SNV  | SNV  | SNV |     | C/T                       | UPSTREAM: 56 bases, UPSTREAM: 343 bases, UPSTREAM: 451 bases     | tRNA, YIR007W, YIR006C |              |                   | ccCaa                    | cCa                   |
| chr9:387383  |         |      |      |      | SNV |      |      |      |     |     | G/A                       | INTERGENIC                                                       |                        |              |                   | agGag                    | gGa                   |
| chr9:387394  |         |      |      |      | SNV |      |      |      |     |     | G/A                       | INTERGENIC                                                       |                        |              |                   | aaGaa                    | aGa                   |
| chr9:436222  |         |      |      |      |     |      |      |      |     | SNV | G/A                       | UPSTREAM: 236 bases, DOWNSTREAM: 824 bases                       | YIR042C, YHL048W       |              |                   | atGat                    | tGa                   |
| chr10:97965  |         |      |      |      |     |      |      |      |     | SNV | G/A                       | STOP_GAINED                                                      | YJL162C                | Caa/Taa      | Q/*               | ttGat                    | tGa                   |
| chr10:117718 |         |      |      |      |     |      |      |      |     | SNV | G/A                       | NON_SYNONYMOUS_CODING                                            | YJL153C                | Ctt/Ttt      | L/F               | aaGgg                    | aGg                   |
| chr10:117719 |         |      |      |      |     |      |      |      |     | SNV | G/A                       | SYNONYMOUS_CODING                                                | YJL153C                | gcC/gcT      | A/A               | agGgc                    | gGg                   |
| chr10:211469 |         |      |      |      |     | SNV  |      |      |     |     | G/A                       | DOWNSTREAM: 104 bases                                            | YJL103C                |              |                   | aaGaa                    | aGa                   |
| chr10:250095 |         |      |      |      | SNV |      |      |      |     |     | C/T                       | SYNONYMOUS_CODING                                                | YJL089W                | tcC/tcT      | S/S               | tcCct                    | cCc                   |
| chr10:255973 |         |      |      |      |     |      |      |      | SNV |     | C/T                       | NON_SYNONYMOUS_CODING                                            | YJL085W                | tCt/tTt      | S/F               | ttCta                    | tCt                   |
| chr10:270895 |         |      |      |      |     |      |      |      |     | SNV | C/T                       | NON_SYNONYMOUS_CODING                                            | YJL080C                | Ggt/Agt      | G/S               | acCcg                    | cCc                   |
| chr10:284492 |         |      |      |      |     |      |      |      |     | SNV | C/T                       | SYNONYMOUS_CODING                                                | YJL074C                | caG/caA      | Q/Q               | ttCtg                    | tCt                   |
| chr10:310014 |         |      |      |      | SNV |      |      |      |     |     | C/A                       | NON_SYNONYMOUS_CODING                                            | YJL058C                | Gca/Tea      | A/S               | tgCat                    | gCa                   |
| chr10:310636 |         |      |      |      | SNV |      |      |      |     |     | G/A                       | DOWNSTREAM: 46 bases, UPSTREAM: 199 bases                        | YJL057C, YJL058C       |              |                   | aaGta                    | aGt                   |
| chr10:310644 |         |      |      |      | SNV |      |      |      |     |     | A/T                       | DOWNSTREAM: 38 bases, UPSTREAM: 207 bases                        | YJL057C, YJL058C       |              |                   | atAaa                    | tAa                   |
| chr10:350162 |         |      |      |      |     |      |      |      |     | SNV | C/T                       | DOWNSTREAM: 870 bases, UPSTREAM: 76 bases                        | YJL039C, YJL041W       |              |                   | acCaa                    | cCa                   |
| chr10:350766 |         |      |      |      |     |      |      |      |     | SNV | T/A                       | DOWNSTREAM: 266 bases, DOWNSTREAM: 109 bases                     | YJL039C, YJL041W       |              |                   | aaTta                    | aTt                   |
| chr10:350772 |         |      |      |      |     |      |      |      |     | SNV | T/C                       | DOWNSTREAM: 260 bases, DOWNSTREAM: 115 bases                     | YJL039C, YJL041W       |              |                   | ttTaa                    | tTa                   |
| chr10:373924 |         |      | SNV  |      |     |      |      |      |     | SNV | C/T                       | UPSTREAM: 297 bases, UPSTREAM: 992 bases, UPSTREAM: 559 bases    | tRNA, YJL026W, YJL029C |              |                   | atCtt                    | tCt                   |
| chr10:420954 |         |      |      |      |     |      |      |      |     | SNV | C/T                       | SYNONYMOUS_CODING                                                | YJR001W                | Ctg/Ttg      | L/L               | ttCtg                    | tCt                   |
| chr10:427541 |         |      |      |      | SNV |      |      |      |     |     | G/A                       | UPSTREAM: 169 bases, UPSTREAM: 893 bases                         | YJR004C, YJR005W       |              |                   | taGaa                    | aGa                   |
| chr10:515880 |         |      |      |      |     |      |      |      |     | SNV | C/T                       | SYNONYMOUS_CODING                                                | YJR052W                | ttC/tT       | F/F               | ttCat                    | tCa                   |
| chr10:519489 |         |      |      |      |     |      |      |      |     | SNV | T/C                       | SYNONYMOUS_CODING                                                | YJR054W                | acT/acC      | T/T               | acTtt                    | cTt                   |
| chr10:592960 |         |      |      |      |     |      |      |      |     | SNV | G/A                       | NON_SYNONYMOUS_CODING                                            | YJR095W                | Ggt/Agt      | G/S               | cgGgt                    | gGg                   |

| Location     | Strains |      |      |      |     |      |      |      |     |     | Nucleotide change ori/mut | Effect                                                          | Systematic gene name      | Codon change | Amino acid change | Five nucleotides context | trinucleotide context |
|--------------|---------|------|------|------|-----|------|------|------|-----|-----|---------------------------|-----------------------------------------------------------------|---------------------------|--------------|-------------------|--------------------------|-----------------------|
|              | AAC     | M715 | MH23 | MH34 | A64 | B130 | B184 | C120 | D5  | F83 |                           |                                                                 |                           |              |                   |                          |                       |
| chr10:594264 |         |      | SNV  |      |     |      |      |      |     | SNV | C/T                       | SYNONYMOUS_CODING                                               | YJR096W                   | taC/taT      | Y/Y               | taCtg                    | aCt                   |
| chr10:632913 |         |      |      | SNV  | SNV | SNV  | SNV  | SNV  | SNV |     | C/T                       | SYNONYMOUS_CODING                                               | YJR122W                   | ttC/ttT      | F/F               | ttCga                    | tCg                   |
| chr10:649540 |         |      |      | SNV  | SNV | SNV  | SNV  | SNV  | SNV |     | G/A                       | SYNONYMOUS_CODING                                               | YJR130C                   | ttC/ttT      | F/F               | atGaa                    | tGa                   |
| chr10:701173 |         |      |      | SNV  | SNV | SNV  | SNV  | SNV  | SNV |     | G/A                       | INTERGENIC                                                      |                           |              |                   | caGaa                    | aGa                   |
| chr11:20308  |         |      |      |      |     |      |      |      |     | SNV | G/A                       | INTERGENIC                                                      |                           |              |                   | caGag                    | aGa                   |
| chr11:50065  |         |      | SNV  |      |     |      |      |      |     | SNV | C/T                       | SYNONYMOUS_CODING                                               | YKL205W                   | atC/atT      | I/I               | atCga                    | tCg                   |
| chr11:102903 |         |      |      |      | SNV |      |      |      |     |     | T/C                       | NON_SYNONYMOUS_CODING                                           | YKL182W                   | tTa/tCa      | L/S               | gtTac                    | tTa                   |
| chr11:314683 |         |      |      | SNV  | SNV | SNV  | SNV  | SNV  | SNV |     | C/T                       | UPSTREAM: 107 bases                                             | YKL067W                   |              |                   | ttCgt                    | tCg                   |
| chr11:421395 |         |      |      |      |     |      |      |      |     | SNV | T/C                       | DOWNSTREAM: 23 bases, UPSTREAM: 185 bases                       | YKL010C, YKL011C          |              |                   | ctTaa                    | tTa                   |
| chr11:509760 |         |      | SNV  |      |     |      |      |      |     | SNV | G/A                       | SYNONYMOUS_CODING                                               | YKR036C                   | acC/acT      | T/T               | gcGgt                    | cGg                   |
| chr11:632200 |         |      |      |      |     |      |      |      |     | SNV | C/T                       | SYNONYMOUS_CODING                                               | YKR097W                   | atC/atT      | I/I               | atCct                    | tCc                   |
| chr11:654652 |         |      |      |      |     |      |      |      |     | SNV | G/A                       | NON_SYNONYMOUS_CODING                                           | YKR103W                   | Gaa/Aaa      | E/K               | gaGaa                    | aGa                   |
| chr11:654754 |         |      |      |      |     |      |      |      |     | SNV | G/A                       | NON_SYNONYMOUS_CODING                                           | YKR103W                   | Gga/Aga      | G/R               | atGga                    | tGg                   |
| chr11:654755 |         |      |      |      |     |      |      |      |     | SNV | G/A                       | NON_SYNONYMOUS_CODING                                           | YKR103W                   | gGa/gAa      | G/E               | tgGag                    | gGa                   |
| chr11:654970 |         |      |      |      |     |      |      |      |     | SNV | G/A                       | NON_SYNONYMOUS_CODING                                           | YKR103W                   | Gac/Aac      | D/N               | ctGac                    | tGa                   |
| chr12:3811   |         |      |      | SNV  | SNV | SNV  | SNV  | SNV  | SNV |     | G/A                       | NON_SYNONYMOUS_CODING                                           | YLL061W                   | Ggt/Agt      | G/S               | aaGgt                    | aGg                   |
| chr12:3812   |         |      |      | SNV  | SNV | SNV  | SNV  | SNV  | SNV |     | G/A                       | NON_SYNONYMOUS_CODING                                           | YLL061W                   | gGt/gAt      | G/D               | agGta                    | gGt                   |
| chr12:4208   |         |      |      | SNV  | SNV | SNV  | SNV  | SNV  | SNV |     | G/A                       | STOP_GAINED                                                     | YLL061W                   | tGg/tAg      | W/*               | atGgt                    | tGg                   |
| chr12:86013  |         |      | SNV  |      |     |      |      |      |     | SNV | C/T                       | SYNONYMOUS_CODING                                               | YLL021W                   | gtC/gtT      | V/V               | gtCtc                    | tCt                   |
| chr12:101816 |         |      |      |      |     |      |      |      |     | SNV | C/T                       | STOP_GAINED                                                     | YLL015W                   | Caa/Taa      | Q/*               | ctCaa                    | tCa                   |
| chr12:115820 |         |      |      |      |     |      |      |      |     | SNV | G/A                       | UPSTREAM: 148 bases, UPSTREAM: 967 bases, DOWNSTREAM: 443 bases | YLL010C, YLL008W, YLL009C |              |                   | gcGat                    | cGa                   |
| chr12:116116 |         |      |      |      |     |      |      |      |     | SNV | G/T                       | UPSTREAM: 444 bases, UPSTREAM: 671 bases, DOWNSTREAM: 147 bases | YLL010C, YLL008W, YLL009C |              |                   | gaGga                    | aGg                   |
| chr12:116117 |         |      |      |      |     |      |      |      |     | SNV | G/A                       | UPSTREAM: 445 bases, UPSTREAM: 670 bases, DOWNSTREAM: 146 bases | YLL010C, YLL008W, YLL009C |              |                   | agGac                    | gGa                   |
| chr12:121186 |         |      |      |      |     |      |      |      |     | SNV | C/T                       | NON_SYNONYMOUS_CODING                                           | YLL007C                   | Gaa/Aaa      | E/K               | ttCat                    | tCa                   |
| chr12:121505 |         |      |      |      |     |      |      |      |     | SNV | C/T                       | UPSTREAM: 126 bases, UPSTREAM: 160 bases                        | YLL006W, YLL007C          |              |                   | ttCaa                    | tCa                   |
| chr12:132817 |         |      |      | SNV  | SNV | SNV  | SNV  | SNV  | SNV |     | G/A                       | UPSTREAM: 98 bases, DOWNSTREAM: 191 bases                       | YLL001W, YLL002W          |              |                   | atGaa                    | tGa                   |
| chr12:233314 |         |      |      |      | SNV |      |      |      |     |     | C/T                       | SYNONYMOUS_CODING                                               | YLR056W                   | ttC/ttT      | F/F               | ttCct                    | tCc                   |
| chr12:237324 |         |      | SNV  |      |     |      |      |      |     | SNV | G/A                       | SYNONYMOUS_CODING                                               | YLR058C                   | ttC/ttT      | F/F               | ttGaa                    | tGa                   |
| chr12:322125 |         |      | SNV  |      |     |      |      |      |     | SNV | G/A                       | NON_SYNONYMOUS_CODING                                           | YLR097C                   | Cat/Tat      | H/Y               | atGga                    | tGg                   |
| chr12:355123 |         |      |      |      |     |      |      |      |     | SNV | G/A                       | DOWNSTREAM: 807 bases, UPSTREAM: 21 bases                       | YLR109W, YLR110C          |              |                   | gcGaa                    | cGa                   |
| chr12:375613 |         |      |      |      |     |      |      |      |     | SNV | G/A                       | UPSTREAM: 337 bases                                             | YLR121C                   |              |                   | acGag                    | cGa                   |
| chr12:378341 |         |      |      |      | SNV |      |      |      |     |     | G/A                       | UPSTREAM: 149 bases                                             | YLR125W                   |              |                   | ggGat                    | gGa                   |



| Location      | Strains |      |      |      |     |      |      |      |     |     | Nucleotide change ori/mut | Effect                                                          | Systematic gene name      | Codon change | Amino acid change | Five nucleotides context | trinucleotide context |
|---------------|---------|------|------|------|-----|------|------|------|-----|-----|---------------------------|-----------------------------------------------------------------|---------------------------|--------------|-------------------|--------------------------|-----------------------|
|               | AAC     | M715 | MH23 | MH34 | A64 | B130 | B184 | C120 | D5  | F83 |                           |                                                                 |                           |              |                   |                          |                       |
| chr12:379714  |         |      |      |      |     |      |      |      | SNV |     | C/T                       | DOWNSTREAM: 814 bases DOWNSTREAM: 57 bases                      | YLR125W, YLR126C          |              |                   | acCtt                    | cCt                   |
| chr12:483636  |         |      |      |      | SNV |      |      |      |     |     | G/A                       | UPSTREAM: 587 bases, DOWNSTREAM: 942 bases, UPSTREAM: 311 bases | YLR166C, YLR168C, YLR167W |              |                   | ctGgg                    | tGg                   |
| chr12:483884  |         |      |      |      |     |      |      |      | SNV |     | G/A                       | UPSTREAM: 835 bases, DOWNSTREAM: 694 bases, UPSTREAM: 63 bases  | YLR166C, YLR168C, YLR167W |              |                   | aaGaa                    | aGa                   |
| chr12:504134  |         |      |      | SNV  | SNV | SNV  | SNV  | SNV  | SNV |     | C/T                       | SYNONYMOUS_CODING                                               | YLR182W                   | gtC/gtT      | V/V               | gtCaa                    | tCa                   |
| chr12:660821  |         |      |      |      |     | SNV  |      |      |     |     | G/A                       | NON_SYNONYMOUS_CODING                                           | YLR266C                   | aCt/aTt      | T/I               | aaGtt                    | aGt                   |
| chr12:674166  |         |      |      |      | SNV |      |      |      |     |     | T/C                       | NON_SYNONYMOUS_CODING                                           | YLR273C                   | Aat/Gat      | N/D               | atTag                    | tTa                   |
| chr12:686228  |         |      |      |      |     | SNV  |      |      |     |     | T/A                       | NON_SYNONYMOUS_CODING                                           | YLR278C                   | Aat/Tat      | N/Y               | atTat                    | tTa                   |
| chr12:752156  |         |      |      |      |     |      |      |      | SNV |     | A/T                       | NON_SYNONYMOUS_CODING                                           | YLR318W                   | Agc/Tgc      | S/C               | atAgc                    | tAg                   |
| chr12:805637  |         |      |      |      | SNV |      |      |      |     |     | A/T                       | STOP_GAINED                                                     | YLR345W                   | Aaa/Taa      | K/*               | atAaa                    | tAa                   |
| chr12:856143  |         |      |      |      | SNV |      |      |      |     |     | G/A                       | NON_SYNONYMOUS_CODING                                           | YLR373C                   | cCg/cTg      | P/L               | tcGgg                    | cGg                   |
| chr12:856144  |         |      |      |      | SNV |      |      |      |     |     | G/A                       | NON_SYNONYMOUS_CODING                                           | YLR373C                   | Ccg/Tcg      | P/S               | cgGgt                    | gGg                   |
| chr12:899027  |         |      |      |      |     |      |      |      | SNV |     | G/T                       | NON_SYNONYMOUS_CODING                                           | YLR397C                   | gaC/gaA      | D/E               | gaGtc                    | aGt                   |
| chr12:923315  |         |      |      |      |     | SNV  |      |      |     |     | G/A                       | SYNONYMOUS_CODING                                               | YLR410W                   | aaG/aaA      | K/K               | aaGat                    | aGa                   |
| chr12:973542  |         |      |      | SNV  | SNV | SNV  | SNV  | SNV  | SNV |     | C/T                       | NON_SYNONYMOUS_CODING                                           | YLR427W                   | tCa/tTa      | S/L               | ttCaa                    | tCa                   |
| chr12:1013307 |         |      |      | SNV  | SNV | SNV  | SNV  | SNV  | SNV |     | G/A                       | UPSTREAM: 546 bases, UPSTREAM: 415 bases                        | YLR448W, YLR447C          |              |                   | ttGat                    | tGa                   |
| chr12:1020872 |         |      |      |      |     |      |      |      | SNV |     | C/T                       | DOWNSTREAM: 110 bases                                           | YLR450W                   |              |                   | ctCtt                    | tCt                   |
| chr12:1032728 |         |      |      |      |     |      |      |      | SNV |     | T/A                       | STOP_GAINED                                                     | YLR454W                   | tTa/tAa      | L/*               | ttTaa                    | tTa                   |
| chr13:86691   |         |      |      |      | SNV |      |      |      |     |     | G/T                       | UPSTREAM: 265 bases                                             | YML088W                   |              |                   | atGct                    | tGc                   |
| chr13:118427  |         |      |      |      | SNV |      |      |      |     |     | A/G                       | SYNONYMOUS_CODING                                               | YML073C                   | tcT/tcC      | S/S               | ttAga                    | tAg                   |
| chr13:118428  |         |      |      |      | SNV |      |      |      |     |     | G/A                       | NON_SYNONYMOUS_CODING                                           | YML073C                   | tCt/tTt      | S/F               | taGag                    | aGa                   |
| chr13:147095  |         |      | SNV  |      |     |      |      |      |     | SNV | C/T                       | NON_SYNONYMOUS_CODING                                           | YML060W                   | Cct/Tct      | P/S               | ttCct                    | tCc                   |
| chr13:183767  |         |      |      |      | SNV |      |      |      |     |     | G/A                       | SYNONYMOUS_CODING                                               | YML049C                   | ttC/ttT      | F/F               | ttGaa                    | tGa                   |
| chr13:223300  |         |      |      | SNV  | SNV | SNV  | SNV  | SNV  | SNV |     | G/A                       | DOWNSTREAM: 956 bases, UPSTREAM: 114 bases, UPSTREAM: 159 bases | YML021C, YML023C, YML022W |              |                   | gtGgg                    | tGg                   |
| chr13:223301  |         |      |      | SNV  | SNV | SNV  | SNV  | SNV  | SNV |     | G/A                       | DOWNSTREAM: 955 bases, UPSTREAM: 115 bases, UPSTREAM: 158 bases | YML021C, YML023C, YML022W |              |                   | tgGga                    | gGg                   |
| chr13:251534  |         |      |      |      |     | SNV  |      |      |     |     | G/A                       | SYNONYMOUS_CODING                                               | YML006C                   | ttC/ttT      | F/F               | ttGaa                    | tGa                   |
| chr13:274080  |         |      |      |      | SNV |      |      |      |     |     | C/T                       | NON_SYNONYMOUS_CODING                                           | YMR006C                   | gGt/gAt      | G/D               | caCca                    | aCc                   |
| chr13:288113  |         |      |      |      | SNV |      |      |      |     |     | T/C                       | SYNONYMOUS_CODING                                               | YMR012W                   | atT/atC      | I/I               | atTga                    | tTg                   |
| chr13:318074  |         |      |      | SNV  | SNV | SNV  | SNV  | SNV  | SNV |     | G/A                       | NON_SYNONYMOUS_CODING                                           | YMR025W                   | Gag/Aag      | E/K               | acGag                    | cGa                   |
| chr13:470350  |         |      |      |      |     | SNV  |      |      |     |     | G/A                       | STOP_GAINED                                                     | YMR105C                   | Caa/Taa      | Q/*               | ttGat                    | tGa                   |
| chr13:486426  |         |      |      | SNV  | SNV | SNV  | SNV  | SNV  | SNV |     | G/A                       | SYNONYMOUS_CODING                                               | YMR110C                   | ttC/ttT      | F/F               | aaGaa                    | aGa                   |
| chr13:487185  |         |      |      | SNV  | SNV | SNV  | SNV  | SNV  | SNV |     | G/A                       | SYNONYMOUS_CODING                                               | YMR111C                   | aaC/aaT      | N/N               | tgGtt                    | gGt                   |
| chr13:556291  |         |      |      |      | SNV |      |      |      |     |     | C/T                       | SYNONYMOUS_CODING                                               | YMR149W                   | tcC/tcT      | S/S               | tcCtc                    | cCt                   |
| chr13:613022  |         |      |      |      |     | SNV  |      |      |     |     | C/T                       | SYNONYMOUS_CODING                                               | YMR178W                   | atC/atT      | I/I               | atCat                    | tCa                   |

| Location     | Strains |      |      |      |     |      |      |      |     |     | Nucleotide change ori/mut | Effect                                                             | Systematic gene name      | Codon change | Amino acid change | Five nucleotides context | trinucleotide context |
|--------------|---------|------|------|------|-----|------|------|------|-----|-----|---------------------------|--------------------------------------------------------------------|---------------------------|--------------|-------------------|--------------------------|-----------------------|
|              | AAC     | M715 | MH23 | MH34 | A64 | B130 | B184 | C120 | D5  | F83 |                           |                                                                    |                           |              |                   |                          |                       |
| chr13:658634 |         |      |      |      |     | SNV  |      |      |     |     | C/T                       | NON_SYNONYMOUS_CODING                                              | YMR199W                   | tCa/tTa      | S/L               | ttCat                    | tCa                   |
| chr13:680767 |         |      |      |      |     |      | SNV  |      |     |     | C/T                       | NON_SYNONYMOUS_CODING                                              | YMR209C                   | Gat/Aat      | D/N               | atCtc                    | tCt                   |
| chr13:722740 |         |      |      |      |     | SNV  |      |      |     |     | A/T                       | NON_SYNONYMOUS_CODING                                              | YMR229C                   | cTa/cAa      | L/Q               | ctAgt                    | tAg                   |
| chr13:726463 |         | SNV  | SNV  | SNV  | SNV | SNV  | SNV  | SNV  | SNV | SNV | G/A                       | UPSTREAM: 626 bases, UPSTREAM: 665 bases                           | YMR229C, YMR230W          |              |                   | aaGaa                    | aGa                   |
| chr13:731688 |         |      |      |      |     |      | SNV  |      |     |     | G/A                       | NON_SYNONYMOUS_CODING                                              | YMR232W                   | Gat/Aat      | D/N               | atGat                    | tGa                   |
| chr13:779011 |         |      |      |      | SNV |      |      |      |     |     | G/A                       | SYNONYMOUS_CODING                                                  | YMR259C                   | ttC/ttT      | F/F               | caGaa                    | aGa                   |
| chr13:810872 |         |      |      |      |     | SNV  |      |      |     |     | G/A                       | NON_SYNONYMOUS_CODING                                              | YMR275C                   | cCa/cTa      | P/L               | ttGgg                    | tGg                   |
| chr13:810873 |         |      |      |      |     | SNV  |      |      |     |     | G/A                       | NON_SYNONYMOUS_CODING                                              | YMR275C                   | Cca/Tca      | P/S               | tgGga                    | gGg                   |
| chr13:819980 |         |      |      |      |     |      |      |      | SNV |     | G/A                       | NON_SYNONYMOUS_CODING                                              | YMR279C                   | Ctt/Ttt      | L/F               | aaGaa                    | aGa                   |
| chr13:821772 |         |      |      |      |     |      |      |      | SNV |     | G/A                       | STOP_GAINED                                                        | YMR280C                   | Caa/Taa      | Q/*               | ttGag                    | tGa                   |
| chr13:898767 |         |      |      |      |     |      |      |      |     | SNV | C/T                       | UPSTREAM: 589 bases, DOWNSTREAM: 387 bases                         | YMR316W, YMR315W          |              |                   | ttCga                    | tCg                   |
| chr14:58165  |         |      |      |      |     | SNV  |      |      |     |     | A/G                       | SYNONYMOUS_CODING                                                  | YNL301C                   | tcT/tcC      | S/S               | gaAga                    | aAg                   |
| chr14:58173  |         |      |      |      |     | SNV  |      |      |     |     | G/A                       | NON_SYNONYMOUS_CODING                                              | YNL301C                   | Ctt/Ttt      | L/F               | aaGat                    | aGa                   |
| chr14:59303  |         |      |      |      |     |      |      |      |     | SNV | C/T                       | UPSTREAM: 752 bases, UPSTREAM: 430 bases                           | YNL301C, YNL300W          |              |                   | gtCac                    | tCa                   |
| chr14:162701 |         |      |      |      |     |      |      |      | SNV |     | G/A                       | NON_SYNONYMOUS_CODING                                              | YNL254C                   | tCt/tTt      | S/F               | taGaa                    | aGa                   |
| chr14:187347 |         |      |      |      |     |      |      |      |     | SNV | A/G                       | NON_SYNONYMOUS_CODING                                              | YNL242W                   | cAa/cGa      | Q/R               | tcAaa                    | cAa                   |
| chr14:272286 |         |      |      |      |     | SNV  |      |      |     |     | C/T                       | SYNONYMOUS_CODING                                                  | YNL192W                   | atC/atT      | I/I               | atCgt                    | tCg                   |
| chr14:275202 |         |      |      |      |     | SNV  |      |      |     |     | G/A                       | SYNONYMOUS_CODING                                                  | YNL191W                   | ttG/ttA      | L/L               | ttGga                    | tGg                   |
| chr14:309348 |         |      |      |      | SNV |      |      |      |     |     | G/A                       | NON_SYNONYMOUS_CODING                                              | YNL172W                   | aGa/aAa      | R/K               | aaGag                    | aGa                   |
| chr14:373248 |         |      |      | SNV  | SNV | SNV  | SNV  | SNV  | SNV |     | A/T                       | DOWNSTREAM: 767 bases, DOWNSTREAM: 300 bases, DOWNSTREAM: 33 bases | YNL132W, YNL130C, YNL131W |              |                   | ttAga                    | tAg                   |
| chr14:381866 |         |      |      |      |     | SNV  |      |      |     |     | G/A                       | SYNONYMOUS_CODING                                                  | YNL126W                   | gaG/gaA      | E/E               | gaGag                    | aGa                   |
| chr14:393947 |         |      | SNV  |      |     |      |      |      |     | SNV | G/A                       | SYNONYMOUS_CODING                                                  | YNL121C                   | Cta/Tta      | L/L               | taGag                    | aGa                   |
| chr14:404160 |         |      |      |      |     | SNV  |      |      |     |     | T/C                       | NON_SYNONYMOUS_CODING                                              | YNL115C                   | cAa/cGa      | Q/R               | ctTga                    | tTg                   |
| chr14:461297 |         |      |      | SNV  | SNV | SNV  | SNV  | SNV  | SNV |     | A/T                       | SYNONYMOUS_CODING                                                  | YNL085W                   | atA/atT      | I/I               | atAtt                    | tAt                   |
| chr14:461298 |         |      |      | SNV  | SNV | SNV  | SNV  | SNV  | SNV |     | T/A                       | NON_SYNONYMOUS_CODING                                              | YNL085W                   | Ttc/Atc      | F/I               | taTtc                    | aTt                   |
| chr14:527549 |         |      |      |      |     | SNV  |      |      |     |     | C/T                       | NON_SYNONYMOUS_CODING                                              | YNL051W                   | tCc/tTc      | S/F               | ttCct                    | tCc                   |
| chr14:566084 |         |      | SNV  |      |     |      |      |      |     | SNV | C/T                       | INTERGENIC                                                         |                           |              |                   | aaCca                    | aCc                   |
| chr14:566085 |         |      | SNV  |      |     |      |      |      |     | SNV | C/T                       | INTERGENIC                                                         |                           |              |                   | acCat                    | cCa                   |
| chr14:585613 |         |      | SNV  |      |     |      |      |      |     | SNV | C/T                       | NON_SYNONYMOUS_CODING                                              | YNL022C                   | aGa/aAa      | R/K               | ctCta                    | tCt                   |
| chr14:650938 |         |      |      |      |     | SNV  |      |      |     |     | G/A                       | NON_SYNONYMOUS_CODING                                              | YNR016C                   | cCt/cTt      | P/L               | caGgg                    | aGg                   |
| chr15:9510   |         |      |      |      |     |      |      |      |     | SNV | C/T                       | UPSTREAM: 25 bases                                                 | YOL163W                   |              |                   | tcCct                    | cCc                   |
| chr15:60408  |         |      |      |      | SNV |      |      |      |     |     | G/A                       | SYNONYMOUS_CODING                                                  | YOL139C                   | gcC/gcT      | A/A               | aaGgc                    | aGg                   |
| chr15:61254  |         |      |      |      | SNV |      |      |      |     |     | G/A                       | SYNONYMOUS_CODING                                                  | YOL138C                   | ctC/ctT      | L/L               | tcGag                    | cGa                   |
| chr15:167264 |         |      |      |      |     |      | SNV  |      |     |     | C/T                       | DOWNSTREAM: 411 bases                                              | YOL083W                   |              |                   | tcCaa                    | cCa                   |
| chr15:275588 |         |      | SNV  |      |     |      |      |      |     | SNV | C/T                       | NON_SYNONYMOUS_CODING                                              | YOL025W                   | cCc/cTc      | P/L               | ccCca                    | cCc                   |
| chr15:279919 |         |      |      |      |     |      |      |      | SNV |     | C/T                       | NON_SYNONYMOUS_CODING                                              | YOL023W                   | cCt/cTt      | P/L               | tcCtc                    | cCt                   |

| Location      | Strains |      |      |      |     |      |      |      |     |     | Nucleotide change ori/mut | Effect                                       | Systematic gene name | Codon change | Amino acid change | Five nucleotides context | trinucleotide context |
|---------------|---------|------|------|------|-----|------|------|------|-----|-----|---------------------------|----------------------------------------------|----------------------|--------------|-------------------|--------------------------|-----------------------|
|               | AAC     | M715 | MH23 | MH34 | A64 | B130 | B184 | C120 | D5  | F83 |                           |                                              |                      |              |                   |                          |                       |
| chr15:315162  |         |      |      | SNV  | SNV | SNV  | SNV  | SNV  | SNV |     | G/A                       | NON_SYNONYMOUS_CODING                        | YOL006C              | tCt/tTt      | S/F               | caGag                    | aGa                   |
| chr15:353053  |         |      | SNV  |      |     |      |      |      |     | SNV | C/T                       | NON_SYNONYMOUS_CODING                        | YOR011W              | Ctt/Ttt      | L/F               | ttCtt                    | tCt                   |
| chr15:361167  |         |      |      |      |     | SNV  |      |      |     |     | G/A                       | UPSTREAM: 57 bases, UPSTREAM: 271 bases      | YOR016C, YOR017W     |              |                   | gtGaa                    | tGa                   |
| chr15:375446  |         |      | SNV  |      |     |      |      |      |     | SNV | G/A                       | NON_SYNONYMOUS_CODING                        | YOR022C              | Cct/Tct      | P/S               | agGag                    | gGa                   |
| chr15:455418  |         |      |      |      |     | SNV  |      |      |     |     | G/A                       | NON_SYNONYMOUS_CODING                        | YOR069W              | Gaa/Aaa      | E/K               | taGaa                    | aGa                   |
| chr15:455718  |         |      |      |      |     | SNV  |      |      |     |     | G/A                       | NON_SYNONYMOUS_CODING                        | YOR069W              | Gaa/Aaa      | E/K               | agGaa                    | gGa                   |
| chr15:455790  |         |      |      |      |     | SNV  |      |      |     |     | G/A                       | NON_SYNONYMOUS_CODING                        | YOR069W              | Gat/Aat      | D/N               | aaGat                    | aGa                   |
| chr15:496253  |         |      |      |      |     |      |      |      |     | SNV | C/T                       | NON_SYNONYMOUS_CODING                        | YOR092W              | tCc/tTc      | S/F               | ttCca                    | tCc                   |
| chr15:535728  |         |      |      |      | SNV |      |      |      |     |     | C/T                       | NON_SYNONYMOUS_CODING                        | YOR113W              | tCt/tTt      | S/F               | ttCta                    | tCt                   |
| chr15:606212  |         |      |      | SNV  | SNV | SNV  | SNV  | SNV  | SNV |     | C/T                       | UPSTREAM: 205 bases, UPSTREAM: 138 bases     | YOR147W, YOR145C     |              |                   | ttCcc                    | tCc                   |
| chr15:617684  |         |      |      |      | SNV |      |      |      |     |     | G/A                       | NON_SYNONYMOUS_CODING                        | YOR152C              | Cca/Tca      | P/S               | tgGaa                    | gGa                   |
| chr15:667488  |         |      |      |      | SNV |      |      |      |     |     | T/A                       | DOWNSTREAM: 275 bases, UPSTREAM: 408 bases   | YOR178C, YOR177C     |              |                   | taTaa                    | aTa                   |
| chr15:679700  |         |      |      |      | SNV |      |      |      |     |     | C/T                       | SYNONYMOUS_CODING                            | YOR184W              | tcC/tcT      | S/S               | tcCct                    | cCc                   |
| chr15:680961  |         |      | SNV  |      |     |      |      |      |     | SNV | G/A                       | DOWNSTREAM: 380 bases, DOWNSTREAM: 520 bases | YOR185C, YOR184W     |              |                   | aaGag                    | aGa                   |
| chr15:685862  |         |      |      |      |     |      |      |      |     | SNV | C/T                       | NON_SYNONYMOUS_CODING                        | YOR188W              | Cat/Tat      | H/Y               | tcCat                    | cCa                   |
| chr15:765016  |         |      |      |      |     | SNV  |      |      |     |     | T/A                       | STOP_GAINED                                  | YOR227W              | tTa/tAa      | L/*               | ttTaa                    | tTa                   |
| chr15:776687  |         |      |      |      |     |      |      |      |     | SNV | C/T                       | NON_SYNONYMOUS_CODING                        | YOR233W              | Cat/Tat      | H/Y               | ctCat                    | tCa                   |
| chr15:817509  |         |      |      |      | SNV |      |      |      |     |     | C/T                       | NON_SYNONYMOUS_CODING                        | YOR262W              | cCg/cTg      | P/L               | tcCgg                    | cCg                   |
| chr15:918128  |         | SNV  |      |      |     |      |      |      |     |     | G/A                       | NON_SYNONYMOUS_CODING                        | YOR321W              | Gcg/Acg      | A/T               | acGcg                    | cGc                   |
| chr15:930648  |         |      | SNV  |      |     |      |      |      |     | SNV | G/A                       | NON_SYNONYMOUS_CODING                        | YOR327C              | cCt/cTt      | P/L               | taGga                    | aGg                   |
| chr15:977525  |         |      |      |      |     | SNV  |      |      |     |     | C/T                       | NON_SYNONYMOUS_CODING                        | YOR344C              | Gaa/Aaa      | E/K               | ttCat                    | tCa                   |
| chr15:1025167 |         |      | SNV  |      |     |      |      |      |     | SNV | G/A                       | SYNONYMOUS_CODING                            | YOR365C              | ctC/ctT      | L/L               | ttGag                    | tGa                   |
| chr15:1039743 |         |      |      |      | SNV |      |      |      |     |     | C/T                       | UPSTREAM: 70 bases, DOWNSTREAM: 381 bases    | YOR374W, YOR373W     |              |                   | ttCtt                    | tCt                   |
| chr15:1040094 |         |      |      |      | SNV |      |      |      |     |     | C/T                       | SYNONYMOUS_CODING                            | YOR374W              | gcC/gcT      | A/A               | gcCtt                    | cCt                   |
| chr16:64912   |         |      |      |      |     |      |      |      |     | SNV | G/A                       | DOWNSTREAM: 3 bases                          | YPL256C              |              |                   | agGaa                    | gGa                   |
| chr16:72809   |         |      |      | SNV  | SNV | SNV  | SNV  | SNV  | SNV |     | G/A                       | NON_SYNONYMOUS_CODING                        | YPL253C              | Cct/Tct      | P/S               | agGtc                    | gGt                   |
| chr16:91710   |         |      | SNV  |      |     |      |      |      |     | SNV | C/T                       | NON_SYNONYMOUS_CODING                        | YPL242C              | aGa/aAa      | R/K               | atCta                    | tCt                   |
| chr16:91711   |         |      | SNV  |      |     |      |      |      |     | SNV | T/C                       | NON_SYNONYMOUS_CODING                        | YPL242C              | Aga/Gga      | R/G               | tcTat                    | cTa                   |
| chr16:146402  |         |      |      |      | SNV |      |      |      |     |     | G/A                       | STOP_GAINED                                  | YPL216W              | tgG/tgA      | W/*               | tgGgc                    | gGg                   |
| chr16:180376  |         |      |      |      |     | SNV  |      |      |     |     | G/A                       | NON_SYNONYMOUS_CODING                        | YPL194W              | gGa/gAa      | G/E               | agGaa                    | gGa                   |
| chr16:224253  |         |      |      |      |     | SNV  |      |      |     |     | G/A                       | NON_SYNONYMOUS_CODING                        | YPL172C              | Cct/Tct      | P/S               | agGat                    | gGa                   |
| chr16:251141  |         |      | SNV  |      |     |      |      |      |     | SNV | G/A                       | SYNONYMOUS_CODING                            | YPL159C              | atC/atT      | I/I               | ttGat                    | tGa                   |
| chr16:274950  |         |      |      |      |     | SNV  |      |      |     |     | C/T                       | STOP_GAINED                                  | YPL147W              | Caa/Taa      | Q/*               | ttCaa                    | tCa                   |
| chr16:360804  |         |      |      |      |     |      |      |      |     | SNV | C/T                       | NON_SYNONYMOUS_CODING                        | YPL101W              | Ccg/Tcg      | P/S               | ctCcg                    | tCc                   |
| chr16:385753  |         |      | SNV  |      |     |      |      |      |     | SNV | G/A                       | NON_SYNONYMOUS_CODING                        | YPL086C              | tCg/tTg      | S/L               | gcGaa                    | cGa                   |

| Location     | Strains |      |      |      |     |      |      |      |     |     | Nucleotide change ori/mut | Effect                                       | Systematic gene name | Codon change | Amino acid change | Five nucleotides context | trinucleotide context |
|--------------|---------|------|------|------|-----|------|------|------|-----|-----|---------------------------|----------------------------------------------|----------------------|--------------|-------------------|--------------------------|-----------------------|
|              | AAC     | M715 | MH23 | MH34 | A64 | B130 | B184 | C120 | D5  | F83 |                           |                                              |                      |              |                   |                          |                       |
| chr16:388199 |         |      | SNV  |      |     |      |      |      |     | SNV | C/T                       | UPSTREAM: 285 bases                          | YPL085W              |              |                   | caCtg                    | aCt                   |
| chr16:463605 |         |      |      |      |     | SNV  |      |      |     |     | C/T                       | NON_SYNONYMOUS_CODING                        | YPL049C              | Gag/Aag      | E/K               | ctCta                    | tCt                   |
| chr16:464746 |         |      |      | SNV  | SNV | SNV  | SNV  | SNV  | SNV |     | G/A                       | NON_SYNONYMOUS_CODING                        | YPL048W              | Gac/Aac      | D/N               | ttGac                    | tGa                   |
| chr16:476452 |         |      | SNV  |      |     |      |      |      |     | SNV | T/A                       | SYNONYMOUS_CODING                            | YPL040C              | ctA/ctT      | L/L               | ttTag                    | tTa                   |
| chr16:489492 |         |      | SNV  |      |     |      |      |      |     | SNV | G/A                       | NON_SYNONYMOUS_CODING                        | YPL032C              | cCt/cTt      | P/L               | aaGga                    | aGg                   |
| chr16:489493 |         |      | SNV  |      |     |      |      |      |     | SNV | G/A                       | NON_SYNONYMOUS_CODING                        | YPL032C              | Cct/Tct      | P/S               | agGag                    | gGa                   |
| chr16:552265 |         |      |      |      |     |      |      |      | SNV |     | G/A                       | SYNONYMOUS_CODING                            | YPL003W              | caG/caA      | Q/Q               | caGta                    | aGt                   |
| chr16:570898 |         |      |      |      |     | SNV  |      |      |     |     | C/T                       | NON_SYNONYMOUS_CODING                        | YPR007C              | gGa/gAa      | G/E               | ttCct                    | tCc                   |
| chr16:571076 |         |      |      |      |     | SNV  |      |      |     |     | T/C                       | NON_SYNONYMOUS_CODING                        | YPR007C              | Aga/Gga      | R/G               | tcTaa                    | cTa                   |
| chr16:571094 |         |      |      |      |     |      | SNV  |      |     |     | C/T                       | NON_SYNONYMOUS_CODING                        | YPR007C              | Gaa/Aaa      | E/K               | ttCga                    | tCg                   |
| chr16:595155 |         |      |      | SNV  | SNV | SNV  | SNV  | SNV  | SNV |     | G/A                       | NON_SYNONYMOUS_CODING                        | YPR018W              | Gaa/Aaa      | E/K               | atGaa                    | tGa                   |
| chr16:610328 |         |      |      |      | SNV |      |      |      |     |     | C/T                       | UPSTREAM: 369 bases, UPSTREAM: 81 bases      | YPR023C, YPR024W     |              |                   | agCtt                    | gCt                   |
| chr16:651647 |         |      |      |      | SNV |      |      |      |     |     | G/A                       | NON_SYNONYMOUS_CODING                        | YPR042C              | tCa/tTa      | S/L               | ctGaa                    | tGa                   |
| chr16:665315 |         |      |      |      |     | SNV  |      |      |     |     | T/C                       | SYNONYMOUS_CODING                            | YPR051W              | Ttg/Ctg      | L/L               | acTtg                    | cTt                   |
| chr16:696881 |         |      |      |      |     |      |      |      | SNV |     | C/T                       | UPSTREAM: 145 bases, DOWNSTREAM: 183 bases   | YPR075C, YPR078C     |              |                   | ttCtg                    | tCt                   |
| chr16:711195 |         |      |      |      |     |      |      | SNV  |     |     | G/A                       | DOWNSTREAM: 123 bases, DOWNSTREAM: 141 bases | YPR086W, YPR088C     |              |                   | taGaa                    | aGa                   |
| chr16:714202 |         |      |      |      |     |      |      | SNV  |     |     | T/C                       | NON_SYNONYMOUS_CODING                        | YPR089W              | tTa/tCa      | L/S               | ctTat                    | tTa                   |
| chr16:885517 |         |      |      | SNV  | SNV | SNV  | SNV  | SNV  | SNV |     | C/T                       | SYNONYMOUS_CODING                            | YPR171W              | caC/caT      | H/H               | caCcc                    | aCc                   |
| chr16:893015 |         |      |      |      |     | SNV  |      |      |     |     | G/A                       | NON_SYNONYMOUS_CODING                        | YPR178W              | Gat/Aat      | D/N               | taGat                    | aGa                   |
| chr16:895637 |         |      | SNV  |      |     |      |      |      |     | SNV | G/A                       | STOP_GAINED                                  | YPR179C              | Caa/Taa      | Q/*               | ttGat                    | tGa                   |
| chr16:907673 |         |      |      |      |     |      | SNV  |      |     |     | C/T                       | NON_SYNONYMOUS_CODING                        | YPR185W              | Ctc/Ttc      | L/F               | ttCtc                    | tCt                   |
| chr16:935323 |         |      |      |      | SNV |      |      |      |     |     | C/T                       | SYNONYMOUS_CODING                            | YPR198W              | gaC/gaT      | D/D               | gaCtt                    | aCt                   |

**Table S4.** Protein altering genes.

| Location     | Strains |      |      |      |     |      |      |      |     |     | Nuc change | Effect        | Systematic gene name | Cdn change | Amino acid change | Standard gene name | Gene description                                                                                                                                                                                                                                                                                                                                                                                                 | Link to SGD                                                                                                                     |
|--------------|---------|------|------|------|-----|------|------|------|-----|-----|------------|---------------|----------------------|------------|-------------------|--------------------|------------------------------------------------------------------------------------------------------------------------------------------------------------------------------------------------------------------------------------------------------------------------------------------------------------------------------------------------------------------------------------------------------------------|---------------------------------------------------------------------------------------------------------------------------------|
|              | AAC     | M715 | MH23 | MH34 | A64 | B130 | B184 | C120 | D5  | F83 |            |               |                      |            |                   |                    |                                                                                                                                                                                                                                                                                                                                                                                                                  |                                                                                                                                 |
| chr4:110630  |         | SNV  | SNV  | SNV  | SNV | SNV  | SNV  | SNV  | SNV | SNV | C/T        | Nonsynonymous | YDL194W              | tCt/tTt    | S97F              | SNF3               | Plasma membrane low glucose sensor, regulates glucose transport; contains 12 predicted transmembrane segments and a long C-terminal tail required for induction of hexose transporters; also senses fructose and mannose; SNF3 has a paralog, RGT2, that arose from the whole genome duplication                                                                                                                 | <a href="http://www.yeastgenome.org/cgi-bin/locus.fpl?locus=SNF3">http://www.yeastgenome.org/cgi-bin/locus.fpl?locus=SNF3</a>   |
| chr7:588482  |         | SNV  | SNV  | SNV  | SNV | SNV  | SNV  | SNV  | SNV | SNV | G/A        | Nonsynonymous | YGR047C              | Ctt/Ttt    | L273F             | TFC4               | Subunit of RNA polymerase III transcription initiation factor complex; one of six subunits of RNA polymerase III transcription initiation factor complex (TFIIIC); part of the TauA domain of TFIIIC that binds BoxA DNA promoter sites of tRNA and similar genes; has TPR motifs; human homolog is TFIIIC-102                                                                                                   | <a href="http://www.yeastgenome.org/cgi-bin/locus.fpl?locus=TFC4">http://www.yeastgenome.org/cgi-bin/locus.fpl?locus=TFC4</a>   |
| chr8:17521   |         | SNV  | SNV  | SNV  | SNV | SNV  | SNV  | SNV  | SNV | SNV | A/G        | Nonsynonymous | YHL038C              | aTg/aCg    | M385T             | CBP2               | Required for splicing of the group I intron bl5 of the COB pre-mRNA; nuclear-encoded mitochondrial protein that binds to the RNA to promote splicing; also involved in but not essential for splicing of the COB bl2 intron and the intron in the 21S rRNA gene                                                                                                                                                  | <a href="http://www.yeastgenome.org/cgi-bin/locus.fpl?locus=CBP2">http://www.yeastgenome.org/cgi-bin/locus.fpl?locus=CBP2</a>   |
| chr3:44524   |         |      | SNV  |      |     |      |      |      |     | SNV | A/T        | Nonsynonymous | YCL045C              | tTc/tAc    | F671Y             | EMC1               | Member of conserved endoplasmic reticulum membrane complex; involved in efficient folding of proteins in the ER; null mutant displays induction of the unfolded protein response; interacts with Gal80p; homologous to worm H17B01.4/EMC-1, fly CG2943, and human KIAA0090                                                                                                                                       | <a href="http://www.yeastgenome.org/cgi-bin/locus.fpl?locus=EMC1">http://www.yeastgenome.org/cgi-bin/locus.fpl?locus=EMC1</a>   |
| chr4:414634  |         |      | SNV  |      |     |      |      |      |     | SNV | G/A        | Nonsynonymous | YDL020C              | Cca/Tca    | P340S             | RPN4               | Transcription factor that stimulates expression of proteasome genes; Rpn4p levels are in turn regulated by the 26S proteasome in a negative feedback control mechanism; RPN4 is transcriptionally regulated by various stress responses; relative distribution to the nucleus increases upon DNA replication stress                                                                                              | <a href="http://www.yeastgenome.org/cgi-bin/locus.fpl?locus=RPN4">http://www.yeastgenome.org/cgi-bin/locus.fpl?locus=RPN4</a>   |
| chr4:1411479 |         |      | SNV  |      |     |      |      |      |     | SNV | C/T        | Nonsynonymous | YDR477W              | Cac/Tac    | H20Y              | SNF1               | AMP-activated serine/threonine protein kinase; found in a complex containing Snf4p and members of the Sip1p/Sip2p/Gal83p family; required for transcription of glucose-repressed genes, thermotolerance, sporulation, and peroxisome biogenesis; involved in regulation of the nucleocytoplasmic shuttling of Hxk2p; regulates filamentous growth in response to starvation                                      | <a href="http://www.yeastgenome.org/cgi-bin/locus.fpl?locus=SNF1">http://www.yeastgenome.org/cgi-bin/locus.fpl?locus=SNF1</a>   |
| chr7:416666  |         |      | SNV  |      |     |      |      |      |     | SNV | C/T        | Nonsynonymous | YGL044C              | Gat/Aat    | D68N              | RNA15              | Component of the cleavage and polyadenylation factor I (CF I); CF 1, composed of the CF 1A complex (Rna14p, Rna15p, Clp1p, Pcf11p) and Hrp1, is involved in cleavage and polyadenylation of mRNA 3' ends; interacts with the A-rich polyadenylation signal in complex with Rna14p and Hrp1p; mutant displays reduced transcription elongation in the G-less-based run-on (GLRO) assay; required for gene looping | <a href="http://www.yeastgenome.org/cgi-bin/locus.fpl?locus=RNA15">http://www.yeastgenome.org/cgi-bin/locus.fpl?locus=RNA15</a> |
| chr7:867105  |         |      | SNV  |      |     |      |      |      |     | SNV | G/A        | Nonsynonymous | YGR185C              | Ctt/Ttt    | L76F              | TYS1               | Cytoplasmic tyrosyl-tRNA synthetase; required for cytoplasmic protein synthesis; interacts with positions 34 and 35 of the tRNATyr anticodon; mutations in human ortholog YARS are associated with Charcot-Marie-Tooth (CMT) neuropathies; protein abundance increases in response to DNA replication stress                                                                                                     | <a href="http://www.yeastgenome.org/cgi-bin/locus.fpl?locus=TYS1">http://www.yeastgenome.org/cgi-bin/locus.fpl?locus=TYS1</a>   |
| chr7:983701  |         |      | SNV  |      |     |      |      |      |     | SNV | G/A        | Nonsynonymous | YGR246C              | gCt/gTt    | A113V             | BRF1               | TFIIIB B-related factor; one of three subunits of RNA polymerase III transcription initiation factor TFIIIB, binds TFIIIC and TBP and recruits RNA pol III to promoters, amino-terminal half is homologous to TFIIIB                                                                                                                                                                                             | <a href="http://www.yeastgenome.org/cgi-bin/locus.fpl?locus=BRF1">http://www.yeastgenome.org/cgi-bin/locus.fpl?locus=BRF1</a>   |
| chr8:193820  |         |      | SNV  |      |     |      |      |      |     | SNV | G/A        | Nonsynonymous | YHR047C              | Cca/Tca    | P249S             | AAP1               | Arginine/alanine amino peptidase; overproduction stimulates glycogen accumulation; AAP1 has a paralog, APE2, that arose from the whole genome duplication                                                                                                                                                                                                                                                        | <a href="http://www.yeastgenome.org/cgi-bin/locus.fpl?locus=AAP1">http://www.yeastgenome.org/cgi-bin/locus.fpl?locus=AAP1</a>   |

| Location     | Strains |      |      |      |     |      |      |      |    |     | Nuc change | Effect        | Systematic gene name | Cdn change | Amino acid change | Standard gene name | Gene description                                                                                                                                                                                                                                                                                                                                                                                        | Link to SGD                                                                                                                         |
|--------------|---------|------|------|------|-----|------|------|------|----|-----|------------|---------------|----------------------|------------|-------------------|--------------------|---------------------------------------------------------------------------------------------------------------------------------------------------------------------------------------------------------------------------------------------------------------------------------------------------------------------------------------------------------------------------------------------------------|-------------------------------------------------------------------------------------------------------------------------------------|
|              | AAC     | M715 | MH23 | MH34 | A64 | B130 | B184 | C120 | D5 | F83 |            |               |                      |            |                   |                    |                                                                                                                                                                                                                                                                                                                                                                                                         |                                                                                                                                     |
| chr8:487581  |         |      | SNV  |      |     |      |      |      |    | SNV | C/T        | Nonsynonymous | YHR197W              | aCt/aTt    | T176I             | RIX1               | Component of the Rix1 complex and possibly pre-replicative complexes; required for processing of ITS2 sequences from 35S pre-rRNA; component of the pre-60S ribosomal particle with the dynein-related AAA-type ATPase Mdn1p; required for pre-replicative complex (pre-RC) formation and maintenance during DNA replication licensing; relocalizes to the cytosol in response to hypoxia;              | <a href="http://www.yeastgenome.org/cgi-bin/locus.fpl?locus=RIX1">http://www.yeastgenome.org/cgi-bin/locus.fpl?locus=RIX1</a>       |
| chr12:322125 |         |      | SNV  |      |     |      |      |      |    | SNV | G/A        | Nonsynonymous | YLR097C              | Cat/Tat    | H44Y              | HRT3               | Putative SCF-ubiquitin ligase F-box protein; based on both genetic and physical interactions and sequence similarity; identified in association with Cdc53p, Skp1p and Ubi4 in large and small-scale studies                                                                                                                                                                                            | <a href="http://www.yeastgenome.org/cgi-bin/locus.fpl?locus=HRT3">http://www.yeastgenome.org/cgi-bin/locus.fpl?locus=HRT3</a>       |
| chr13:147095 |         |      | SNV  |      |     |      |      |      |    | SNV | C/T        | Nonsynonymous | YML060W              | Cct/Tct    | P167S             | OGG1               | Nuclear and mitochondrial glycosylase/lyase; specifically excises 7,8-dihydro-8-oxoguanine residues located opposite cytosine or thymine residues in DNA, repairs oxidative damage to mitochondrial DNA, contributes to UVA resistance                                                                                                                                                                  | <a href="http://www.yeastgenome.org/cgi-bin/locus.fpl?locus=OGG1">http://www.yeastgenome.org/cgi-bin/locus.fpl?locus=OGG1</a>       |
| chr14:585613 |         |      | SNV  |      |     |      |      |      |    | SNV | C/T        | Nonsynonymous | YNL022C              | aGa/aAa    | R425K             | RCM1               | rRNA m5C methyltransferase; methylates cytosine at position 2278 of 25S rRNA while Nop2p methylates cytosine at position 2870; contains seven beta-strand methyltransferase motif; localized to the nucleolus; interacts with Trm112p; homolog of NSUN5A, a human gene which is deleted in Williams-Beuren Syndrome                                                                                     | <a href="http://www.yeastgenome.org/cgi-bin/locus.fpl?locus=RCM1">http://www.yeastgenome.org/cgi-bin/locus.fpl?locus=RCM1</a>       |
| chr15:275588 |         |      | SNV  |      |     |      |      |      |    | SNV | C/T        | Nonsynonymous | YOL025W              | cCc/cTc    | P262L             | LAG2               | Protein that negatively regulates the SCF E3-ubiquitin ligase; regulates by interacting with and preventing neddylation of the cullin subunit, Cdc53p; longevity determinant that is preferentially expressed in young cells; similar to mammalian Cand1                                                                                                                                                | <a href="http://www.yeastgenome.org/cgi-bin/locus.fpl?locus=LAG2">http://www.yeastgenome.org/cgi-bin/locus.fpl?locus=LAG2</a>       |
| chr15:353053 |         |      | SNV  |      |     |      |      |      |    | SNV | C/T        | Nonsynonymous | YOR011W              | Ctt/Ttt    | L1158F            | AUS1               | Plasma membrane sterol transporter of the ATP-binding cassette family; required, along with Pdr11p, for uptake of exogenous sterols and their incorporation into the plasma membrane; activity is stimulated by phosphatidylserine; sterol uptake is required for anaerobic growth because sterol biosynthesis requires oxygen; AUS1 has a paralog, PDR11, that arose from the whole genome duplication | <a href="http://www.yeastgenome.org/cgi-bin/locus.fpl?locus=AUS1">http://www.yeastgenome.org/cgi-bin/locus.fpl?locus=AUS1</a>       |
| chr15:375446 |         |      | SNV  |      |     |      |      |      |    | SNV | G/A        | Nonsynonymous | YOR022C              | Cct/Tct    | P148S             |                    | Putative carboxylic ester hydrolase; similar to bovine phospholipase A1; the authentic, non-tagged protein is detected in highly purified mitochondria in high-throughput studies                                                                                                                                                                                                                       | <a href="http://www.yeastgenome.org/cgi-bin/locus.fpl?locus=YOR022C">http://www.yeastgenome.org/cgi-bin/locus.fpl?locus=YOR022C</a> |
| chr15:930648 |         |      | SNV  |      |     |      |      |      |    | SNV | G/A        | Nonsynonymous | YOR327C              | cCt/cTt    | P109L             | SNC2               | Vesicle membrane receptor protein (v-SNARE); involved in the fusion between Golgi-derived secretory vesicles with the plasma membrane; member of the synaptobrevin/VAMP family of R-type v-SNARE proteins; SNC2 has a paralog, SNC1, that arose from the whole genome duplication                                                                                                                       | <a href="http://www.yeastgenome.org/cgi-bin/locus.fpl?locus=SNC2">http://www.yeastgenome.org/cgi-bin/locus.fpl?locus=SNC2</a>       |
| chr16:91710  |         |      | SNV  |      |     |      |      |      |    | SNV | C/T        | Nonsynonymous | YPL242C              | AGa/GAa    | R1112E            | IQG1               | Essential protein required for determination of budding pattern; promotes localization of axial markers Bud4p and Cdc12p and functionally interacts with Sec3p, localizes to the contractile ring during anaphase, member of the IQGAP family; relocalizes from bud neck to cytoplasm upon DNA replication stress                                                                                       | <a href="http://www.yeastgenome.org/cgi-bin/locus.fpl?locus=IQG1">http://www.yeastgenome.org/cgi-bin/locus.fpl?locus=IQG1</a>       |
| chr16:91711  |         |      | SNV  |      |     |      |      |      |    | SNV | T/C        | Nonsynonymous |                      |            |                   |                    |                                                                                                                                                                                                                                                                                                                                                                                                         |                                                                                                                                     |
| chr16:385753 |         |      | SNV  |      |     |      |      |      |    | SNV | G/A        | Nonsynonymous | YPL086C              | tCg/tTg    | S217L             | ELP3               | Subunit of Elongator complex; Elongator is required for modification of wobble nucleosides in tRNA; exhibits histone acetyltransferase activity that is directed to histones H3 and H4; disruption confers resistance to K. lactis zymotoxin                                                                                                                                                            | <a href="http://www.yeastgenome.org/cgi-bin/locus.fpl?locus=ELP3">http://www.yeastgenome.org/cgi-bin/locus.fpl?locus=ELP3</a>       |
| chr16:489492 |         |      | SNV  |      |     |      |      |      |    | SNV | G/A        | Nonsynonymous | YPL032C              | Cct/TTt    | P601F             | SVL3               | Protein of unknown function; mutant phenotype suggests a potential role in vacuolar function; green fluorescent protein (GFP)-fusion protein localizes to the cell periphery, cytoplasm, bud, and bud neck; relocalizes from bud neck to cytoplasm upon DNA replication stress; SVL3 has a paralog, PAM1, that arose from the whole genome duplication                                                  | <a href="http://www.yeastgenome.org/cgi-bin/locus.fpl?locus=SVL3">http://www.yeastgenome.org/cgi-bin/locus.fpl?locus=SVL3</a>       |
| chr16:489493 |         |      | SNV  |      |     |      |      |      |    | SNV | G/A        | Nonsynonymous |                      |            |                   |                    |                                                                                                                                                                                                                                                                                                                                                                                                         |                                                                                                                                     |

| Location     | Strains |      |      |      |     |      |      |      |     |     | Nuc change | Effect        | Systematic gene name | Cdn change | Amino acid change | Standard gene name | Gene description                                                                                                                                                                                                                                                                                                                                                                                      | Link to SGD                                                                                                                   |
|--------------|---------|------|------|------|-----|------|------|------|-----|-----|------------|---------------|----------------------|------------|-------------------|--------------------|-------------------------------------------------------------------------------------------------------------------------------------------------------------------------------------------------------------------------------------------------------------------------------------------------------------------------------------------------------------------------------------------------------|-------------------------------------------------------------------------------------------------------------------------------|
|              | AAC     | M715 | MH23 | MH34 | A64 | B130 | B184 | C120 | D5  | F83 |            |               |                      |            |                   |                    |                                                                                                                                                                                                                                                                                                                                                                                                       |                                                                                                                               |
| chr16:895637 |         |      | SNV  |      |     |      |      |      |     | SNV | G/A        | Stop gained   | YPR179C              | Caa/Taa    | Q47*              | HDA3               | Subunit of the HDA1 histone deacetylase complex; possibly tetrameric trichostatin A-sensitive class II histone deacetylase complex contains Hda1p homodimer and an Hda2p-Hda3p heterodimer; required for the activity of the complex; relocalizes to the cytosol in response to hypoxia; similar to Hda2p                                                                                             | <a href="http://www.yeastgenome.org/cgi-bin/locus.fpl?locus=HDA3">http://www.yeastgenome.org/cgi-bin/locus.fpl?locus=HDA3</a> |
| chr2:707966  |         |      |      |      |     |      |      |      |     | SNV | G/A        | Nonsynonymous | YBR247C              | Cgt/Tgt    | R445C             | ENP1               | Protein associated with U3 and U14 snoRNAs; required for pre-rRNA processing and 40S ribosomal subunit synthesis; localized in the nucleus and concentrated in the nucleolus                                                                                                                                                                                                                          | <a href="http://www.yeastgenome.org/cgi-bin/locus.fpl?locus=ENP1">http://www.yeastgenome.org/cgi-bin/locus.fpl?locus=ENP1</a> |
| chr4:1121403 |         |      |      |      |     |      |      |      |     | SNV | G/A        | Nonsynonymous | YDR326C              | tCc/tTc    | S849F             | YSP2               | Protein involved in programmed cell death; mutant shows resistance to cell death induced by amidarone or intracellular acidification; YSP2 has a paralog, YHR080C, that arose from the whole genome                                                                                                                                                                                                   | <a href="http://www.yeastgenome.org/cgi-bin/locus.fpl?locus=YSP2">http://www.yeastgenome.org/cgi-bin/locus.fpl?locus=YSP2</a> |
| chr5:278493  |         |      |      |      |     |      |      |      |     | SNV | C/T        | Nonsynonymous | YER062C              | Gaa/Aaa    | E92K              | HOR2               | DL-glycerol-3-phosphate phosphatase involved in glycerol biosynthesis; also known as glycerol-1-phosphatase; induced in response to hyperosmotic or oxidative stress, and during diauxic shift; GPP2 has a paralog, GPP1, that arose from the whole genome duplication                                                                                                                                | <a href="http://www.yeastgenome.org/cgi-bin/locus.fpl?locus=HOR2">http://www.yeastgenome.org/cgi-bin/locus.fpl?locus=HOR2</a> |
| chr8:117651  |         |      |      |      |     |      |      |      |     | SNV | T/A        | Nonsynonymous | YHR009C              | gAt/gTt    | D397V             | TDA3               | Putative oxidoreductase involved in late endosome to Golgi transport; physical and genetical interactions with Btn2p; null mutant is viable, has extended S phase, and sensitive to expression of top1-T722A allele; similar to human FOXRED1                                                                                                                                                         | <a href="http://www.yeastgenome.org/cgi-bin/locus.fpl?locus=TDA3">http://www.yeastgenome.org/cgi-bin/locus.fpl?locus=TDA3</a> |
| chr10:97965  |         |      |      |      |     |      |      |      |     | SNV | G/A        | Stop gained   | YJL162C              | Caa/Taa    | Q69*              | JJJ2               | Protein of unknown function; contains a J-domain, which is a region with homology to the E. coli DnaJ protein                                                                                                                                                                                                                                                                                         | <a href="http://www.yeastgenome.org/cgi-bin/locus.fpl?locus=JJJ2">http://www.yeastgenome.org/cgi-bin/locus.fpl?locus=JJJ2</a> |
| chr10:592960 |         |      |      |      |     |      |      |      |     | SNV | G/A        | Nonsynonymous | YJR095W              | Ggt/Agt    | G225S             | SFC1               | Mitochondrial succinate-fumarate transporter; transports succinate into and fumarate out of the mitochondrion; required for ethanol and acetate utilization                                                                                                                                                                                                                                           | <a href="http://www.yeastgenome.org/cgi-bin/locus.fpl?locus=SFC1">http://www.yeastgenome.org/cgi-bin/locus.fpl?locus=SFC1</a> |
| chr12:899027 |         |      |      |      |     |      |      |      |     | SNV | G/T        | Nonsynonymous | YLR397C              | gaC/gaA    | D358E             | AFG2               | ATPase of the CDC48/PAS1/SEC18 (AAA) family, forms a hexameric complex; is essential for pre-60S maturation and release of several preribosome maturation factors; releases Rlp24p from purified pre-60S particles in vitro; may be involved in degradation of aberrant                                                                                                                               | <a href="http://www.yeastgenome.org/cgi-bin/locus.fpl?locus=AFG2">http://www.yeastgenome.org/cgi-bin/locus.fpl?locus=AFG2</a> |
| chr14:187347 |         |      |      |      |     |      |      |      |     | SNV | A/G        | Nonsynonymous | YNL242W              | cAa/cGa    | Q686R             | ATG2               | Peripheral membrane protein required for autophagic vesicle formation; also required for vesicle formation during pexophagy and the cytoplasm-to-vacuole targeting (Cvt) pathway; involved in Atg9p cycling between the phagophore assembly site and mitochondria; essential for cell cycle progression from G2/M to G1 under nitrogen starvation; forms cytoplasmic foci upon DNA replication stress | <a href="http://www.yeastgenome.org/cgi-bin/locus.fpl?locus=ATG2">http://www.yeastgenome.org/cgi-bin/locus.fpl?locus=ATG2</a> |
| chr15:685862 |         |      |      |      |     |      |      |      |     | SNV | C/T        | Nonsynonymous | YOR188W              | Cat/Tat    | H64Y              | MSB1               | Protein of unknown function; may be involved in positive regulation of 1,3-beta-glucan synthesis and the Pkc1p-MAPK pathway; multicopy suppressor of temperature-sensitive mutations in CDC24 and CDC42, and of mutations in BEM4; potential Cdc28p substrate; relocalizes from bud neck to cytoplasm upon DNA replication stress                                                                     | <a href="http://www.yeastgenome.org/cgi-bin/locus.fpl?locus=MSB1">http://www.yeastgenome.org/cgi-bin/locus.fpl?locus=MSB1</a> |
| chr15:776687 |         |      |      |      |     |      |      |      |     | SNV | C/T        | Nonsynonymous | YOR233W              | Cat/Tat    | H316Y             | KIN4               | Serine/threonine protein kinase; inhibits the mitotic exit network (MEN) when the spindle position checkpoint is activated; localized asymmetrically to mother cell cortex, spindle pole body and bud neck; KIN4 has a paralog, FRK1, that arose from the whole genome duplication                                                                                                                    | <a href="http://www.yeastgenome.org/cgi-bin/locus.fpl?locus=KIN4">http://www.yeastgenome.org/cgi-bin/locus.fpl?locus=KIN4</a> |
| chr1:49928   |         |      |      | SNV  | SNV | SNV  | SNV  | SNV  | SNV |     | C/T        | Nonsynonymous | YAL051W              | Cca/Tca    | P437S             | OAF1               | Oleate-activated transcription factor; acts alone and as a heterodimer with Pip2p; activates genes involved in beta-oxidation of fatty acids and peroxisome organization and biogenesis; involved in diauxic shift; OAF1 has a paralog, PIP2, that arose from the whole genome duplication                                                                                                            | <a href="http://www.yeastgenome.org/cgi-bin/locus.fpl?locus=OAF1">http://www.yeastgenome.org/cgi-bin/locus.fpl?locus=OAF1</a> |

| Location     | Strains |      |      |      |     |      |      |      |     |     | Nuc change | Effect                   | Systematic gene name | Cdn change | Amino acid change | Standard gene name | Gene description                                                                                                                                                                                                                                                                                                                                             | Link to SGD                                                                                                                   |
|--------------|---------|------|------|------|-----|------|------|------|-----|-----|------------|--------------------------|----------------------|------------|-------------------|--------------------|--------------------------------------------------------------------------------------------------------------------------------------------------------------------------------------------------------------------------------------------------------------------------------------------------------------------------------------------------------------|-------------------------------------------------------------------------------------------------------------------------------|
|              | AAC     | M715 | MH23 | MH34 | A64 | B130 | B184 | C120 | D5  | F83 |            |                          |                      |            |                   |                    |                                                                                                                                                                                                                                                                                                                                                              |                                                                                                                               |
| chr2:123579  |         |      |      |      | SNV | SNV  | SNV  | SNV  | SNV | SNV | C/T        | Nonsynonymous            | YBL047C              | Gaa/Aaa    | E1057K            | EDE1               | Endocytic protein; involved in a network of interactions with other endocytic proteins, binds membranes in a ubiquitin-dependent manner, may also bind ubiquitinated membrane-associated proteins; interacts with Cmk2 and functions upstream of CMK2 in regulating non-apoptotic cell death                                                                 | <a href="http://www.yeastgenome.org/cgi-bin/locus.fpl?locus=EDE1">http://www.yeastgenome.org/cgi-bin/locus.fpl?locus=EDE1</a> |
| chr3:68490   |         |      |      |      | SNV | SNV  | SNV  | SNV  | SNV | SNV | G/A        | Nonsynonymous            | YCL029C              | tCg/tTg    | S365L             | BIK1               | Microtubule-associated protein; component of the interface between microtubules and kinetochore, involved in sister chromatid separation; essential in polyploid cells but not in haploid or diploid cells; ortholog of mammalian CLIP-170                                                                                                                   | <a href="http://www.yeastgenome.org/cgi-bin/locus.fpl?locus=BIK1">http://www.yeastgenome.org/cgi-bin/locus.fpl?locus=BIK1</a> |
| chr4:346549  |         |      |      |      | SNV | SNV  | SNV  | SNV  | SNV | SNV | C/T        | Nonsynonymous            | YDL058W              | tCt/tTt    | S660F             | USO1               | Essential protein involved in vesicle-mediated ER to Golgi transport; binds membranes and functions during vesicle docking to the Golgi; required for assembly of the ER-to-Golgi SNARE complex                                                                                                                                                              | <a href="http://www.yeastgenome.org/cgi-bin/locus.fpl?locus=USO1">http://www.yeastgenome.org/cgi-bin/locus.fpl?locus=USO1</a> |
| chr4:352412  |         |      |      |      | SNV | SNV  | SNV  | SNV  | SNV | SNV | C/T        | Nonsynonymous            | YDL056W              | cCc/cTc    | P211L             | MBP1               | Transcription factor; involved in regulation of cell cycle progression from G1 to S phase, forms a complex with Swi6p that binds to MluI cell cycle box regulatory element in promoters of DNA synthesis genes                                                                                                                                               | <a href="http://www.yeastgenome.org/cgi-bin/locus.fpl?locus=MBP1">http://www.yeastgenome.org/cgi-bin/locus.fpl?locus=MBP1</a> |
| chr4:585289  |         |      |      |      | SNV | SNV  | SNV  | SNV  | SNV | SNV | G/A        | Nonsynonymous            | YDR069C              | tCa/tTa    | S498L             | DOA4               | Ubiquitin hydrolase that deubiquitinates ILV cargo proteins; required for recycling ubiquitin from proteasome-bound ubiquitinated intermediates, acts at the late endosome/prevacuolar compartment to recover ubiquitin from ubiquitinated membrane proteins en route to the vacuole; DOA4 has a paralog, UBP5, that arose from the whole genome duplication | <a href="http://www.yeastgenome.org/cgi-bin/locus.fpl?locus=DOA4">http://www.yeastgenome.org/cgi-bin/locus.fpl?locus=DOA4</a> |
| chr4:585398  |         |      |      |      | SNV | SNV  | SNV  | SNV  | SNV | SNV | G/A        | Nonsynonymous            |                      | Ctt/Ttt    | L462F             |                    |                                                                                                                                                                                                                                                                                                                                                              |                                                                                                                               |
| chr4:595180  |         |      |      |      | SNV | SNV  | SNV  | SNV  | SNV | SNV | C/T        | Nonsynonymous            | YDR074W              | Cgt/Tgt    | R735C             | TPS2               | Phosphatase subunit of the trehalose-6-P synthase/phosphatase complex; involved in synthesis of the storage carbohydrate trehalose; expression is induced by stress conditions and repressed by the Ras-cAMP pathway; protein abundance increases in response to DNA replication stress                                                                      | <a href="http://www.yeastgenome.org/cgi-bin/locus.fpl?locus=TPS2">http://www.yeastgenome.org/cgi-bin/locus.fpl?locus=TPS2</a> |
| chr4:1052323 |         |      |      |      | SNV | SNV  | SNV  | SNV  | SNV | SNV | G/A        | Stop gained              | YDR295C              | Caa/Taa    | Q452*             | HDA2               | Subunit of the HDA1 histone deacetylase complex; possibly tetrameric trichostatin A-sensitive class II histone deacetylase complex contains Hda1p homodimer and an Hda2p-Hda3p heterodimer; involved in telomere maintenance; relocalizes to the cytosol in response to hypoxia                                                                              | <a href="http://www.yeastgenome.org/cgi-bin/locus.fpl?locus=HDA2">http://www.yeastgenome.org/cgi-bin/locus.fpl?locus=HDA2</a> |
| chr5:409300  |         |      |      |      | SNV | SNV  | SNV  | SNV  | SNV | SNV | C/T        | Nonsynonymous            | YER125W              | Cca/Tca    | P343S             | RSP5               | E3 ubiquitin ligase of the NEDD4 family; involved in regulating many cellular processes including MVB sorting, heat shock response, transcription, endocytosis, and ribosome stability; human homolog is involved in Liddle syndrome; mutant tolerates aneuploidy; deubiquitinated by Ubp2p; autoubiquitinates and ubiquitinates Sec23p and Sna3p            | <a href="http://www.yeastgenome.org/cgi-bin/locus.fpl?locus=RSP5">http://www.yeastgenome.org/cgi-bin/locus.fpl?locus=RSP5</a> |
| chr7:62380   |         |      |      |      | INS | INS  | INS  | INS  | INS | INS | */+GA      | Frame shift, 2 bp insert | YGL232W              |            |                   | TAN1               | Putative tRNA acetyltransferase; RNA-binding protein required for the formation of the modified nucleoside N(4)-acetylcytidine in serine and leucine tRNAs but not required for the same modification in 18S rRNA; protein abundance increases in response to DNA replication stress                                                                         | <a href="http://www.yeastgenome.org/cgi-bin/locus.fpl?locus=TAN1">http://www.yeastgenome.org/cgi-bin/locus.fpl?locus=TAN1</a> |
| chr7:213242  |         |      |      |      | SNV | SNV  | SNV  | SNV  | SNV | SNV | G/A        | Nonsynonymous            | YGL156W              | Gaa/Aaa    | E859K             | AMS1               | Vacuolar alpha mannosidase; involved in free oligosaccharide (fOS) degradation; delivered to the vacuole in a novel pathway separate from the secretory pathway                                                                                                                                                                                              | <a href="http://www.yeastgenome.org/cgi-bin/locus.fpl?locus=AMS1">http://www.yeastgenome.org/cgi-bin/locus.fpl?locus=AMS1</a> |



| Location     | Strains |      |      |      |     |      |      |      |     |     | Nuc change | Effect        | Systematic gene name | Cdn change | Amino acid change | Standard gene name | Gene description                                                                                                                                                                                                                                                                                                                                                                                                    | Link to SGD                                                                                                                   |
|--------------|---------|------|------|------|-----|------|------|------|-----|-----|------------|---------------|----------------------|------------|-------------------|--------------------|---------------------------------------------------------------------------------------------------------------------------------------------------------------------------------------------------------------------------------------------------------------------------------------------------------------------------------------------------------------------------------------------------------------------|-------------------------------------------------------------------------------------------------------------------------------|
|              | AAC     | M715 | MH23 | MH34 | A64 | B130 | B184 | C120 | D5  | F83 |            |               |                      |            |                   |                    |                                                                                                                                                                                                                                                                                                                                                                                                                     |                                                                                                                               |
| chr7:260149  |         |      |      | SNV  | SNV | SNV  | SNV  | SNV  | SNV |     | C/T        | Stop gained   | YGL133W              | Cga/Tga    | R732*             | ITC1               | Subunit of ATP-dependent Isw2p-Itc1p chromatin remodeling complex; required for repression of a-specific genes, repression of early meiotic genes during mitotic growth, and repression of INO1; similar to mammalian Acf1p, the regulatory subunit of the mammalian ATP-utilizing chromatin assembly and modifying factor (ACF) complex; ITC1 has a paralog, YPL216W, that arose from the whole genome duplication | <a href="http://www.yeastgenome.org/cgi-bin/locus.fpl?locus=ITC1">http://www.yeastgenome.org/cgi-bin/locus.fpl?locus=ITC1</a> |
| chr7:732569  |         |      |      | SNV  | SNV | SNV  | SNV  | SNV  | SNV |     | C/T        | Nonsynonymous | YGR121C              | Ggt/Agt    | G63S              | MEP1               | Ammonium permease; belongs to a ubiquitous family of cytoplasmic membrane proteins that transport only ammonium (NH4+); expression is under the nitrogen catabolite repression regulation; MEP1 has a paralog, MEP3, that arose from the whole genome duplication                                                                                                                                                   | <a href="http://www.yeastgenome.org/cgi-bin/locus.fpl?locus=MEP1">http://www.yeastgenome.org/cgi-bin/locus.fpl?locus=MEP1</a> |
| chr7:903295  |         |      |      | SNV  | SNV | SNV  | SNV  | SNV  | SNV |     | G/A        | Nonsynonymous | YGR202C              | tCa/tTa    | S422L             | PCT1               | Cholinephosphate cytidyltransferase; a rate-determining enzyme of the CDP-choline pathway for phosphatidylcholine synthesis, inhibited by Sec14p, activated upon lipid-binding; contains an element within the regulatory domain involved in both silencing and activation of enzymatic activity                                                                                                                    | <a href="http://www.yeastgenome.org/cgi-bin/locus.fpl?locus=PCT1">http://www.yeastgenome.org/cgi-bin/locus.fpl?locus=PCT1</a> |
| chr8:32631   |         |      |      | SNV  | SNV | SNV  | SNV  | SNV  | SNV |     | G/A        | Nonsynonymous | YHL031C              | tCt/tTt    | S6F               | GOS1               | v-SNARE protein involved in Golgi transport; homolog of the mammalian protein GOS-28/GS28                                                                                                                                                                                                                                                                                                                           | <a href="http://www.yeastgenome.org/cgi-bin/locus.fpl?locus=GOS1">http://www.yeastgenome.org/cgi-bin/locus.fpl?locus=GOS1</a> |
| chr8:170565  |         |      |      | SNV  | SNV | SNV  | SNV  | SNV  | SNV |     | G/A        | Nonsynonymous | YHR034C              | tCc/tTc    | S230F             | PIH1               | Component of the conserved R2TP complex (Rvb1-Rvb2-Tah1-Pih1); R2TP complex interacts with Hsp90 (Hsp82p and Hsc82p) to mediate assembly large protein complexes such as box C/D snoRNPs and RNA polymerase II                                                                                                                                                                                                      | <a href="http://www.yeastgenome.org/cgi-bin/locus.fpl?locus=PIH1">http://www.yeastgenome.org/cgi-bin/locus.fpl?locus=PIH1</a> |
| chr8:170665  |         |      |      | SNV  | SNV | SNV  | SNV  | SNV  | SNV |     | G/A        | Nonsynonymous |                      | Ccg/Tcg    | P197S             |                    |                                                                                                                                                                                                                                                                                                                                                                                                                     |                                                                                                                               |
| chr9:334662  |         |      |      | SNV  | SNV | SNV  | SNV  | SNV  | SNV |     | C/T        | Nonsynonymous | YIL011W              | tCt/tTt    | S212F             | TIR3               | Cell wall mannoprotein; member of Srp1p/Tip1p family of serine-alanine-rich proteins; expressed under anaerobic conditions and required for anaerobic growth; TIR3 has a paralog, TIR2, that arose from the whole genome duplication                                                                                                                                                                                | <a href="http://www.yeastgenome.org/cgi-bin/locus.fpl?locus=TIR3">http://www.yeastgenome.org/cgi-bin/locus.fpl?locus=TIR3</a> |
| chr12:3811   |         |      |      | SNV  | SNV | SNV  | SNV  | SNV  | SNV |     | G/A        | Nonsynonymous | YLL061W              | Ggt/AAt    | G103N             | MMP1               | High-affinity S-methylmethionine permease; required for utilization of S-methylmethionine as a sulfur source; has similarity to S-adenosylmethionine permease Sam3p                                                                                                                                                                                                                                                 | <a href="http://www.yeastgenome.org/cgi-bin/locus.fpl?locus=MMP1">http://www.yeastgenome.org/cgi-bin/locus.fpl?locus=MMP1</a> |
| chr12:3812   |         |      |      | SNV  | SNV | SNV  | SNV  | SNV  | SNV |     | G/A        | Nonsynonymous |                      |            |                   |                    |                                                                                                                                                                                                                                                                                                                                                                                                                     |                                                                                                                               |
| chr12:4208   |         |      |      | SNV  | SNV | SNV  | SNV  | SNV  | SNV |     | G/A        | Stop gained   |                      | tGg/tAg    | W235*             |                    |                                                                                                                                                                                                                                                                                                                                                                                                                     |                                                                                                                               |
| chr12:973542 |         |      |      | SNV  | SNV | SNV  | SNV  | SNV  | SNV |     | C/T        | Nonsynonymous | YLR427W              | tCa/tTa    | S34L              | MAG2               | Cytoplasmic protein of unknown function; induced in response to mycotoxin patulin; ubiquitinated protein similar to the human ring finger motif protein RNF10; predicted to be involved in repair of alkylated DNA due to interaction with MAG1                                                                                                                                                                     | <a href="http://www.yeastgenome.org/cgi-bin/locus.fpl?locus=MAG2">http://www.yeastgenome.org/cgi-bin/locus.fpl?locus=MAG2</a> |
| chr13:318074 |         |      |      | SNV  | SNV | SNV  | SNV  | SNV  | SNV |     | G/A        | Nonsynonymous | YMR025W              | Gag/Aag    | E19K              | CSI1               | Subunit of the Cop9 signalosome; which is required for deneddylation, or removal of the ubiquitin-like protein Rub1p from Cdc53p (cullin); involved in adaptation to pheromone signaling; functional equivalent of canonical Csn6 subunit of the COP9 signalosome                                                                                                                                                   | <a href="http://www.yeastgenome.org/cgi-bin/locus.fpl?locus=CSI1">http://www.yeastgenome.org/cgi-bin/locus.fpl?locus=CSI1</a> |
| chr14:461298 |         |      |      | SNV  | SNV | SNV  | SNV  | SNV  | SNV |     | T/A        | Nonsynonymous | YNL085W              | Ttc/Atc    | F70I              | MKT1               | Protein that forms a complex with Pbp1p; complex may mediate posttranscriptional regulation of HO; involved in propagation of M2 dsRNA satellite of L-A virus; allelic variation affects mitochondrial genome stability, drug resistance, and more; forms cytoplasmic foci upon DNA replication stress                                                                                                              | <a href="http://www.yeastgenome.org/cgi-bin/locus.fpl?locus=MKT1">http://www.yeastgenome.org/cgi-bin/locus.fpl?locus=MKT1</a> |
| chr15:315162 |         |      |      | SNV  | SNV | SNV  | SNV  | SNV  | SNV |     | G/A        | Nonsynonymous | YOL006C              | tCt/tTt    | S37F              | TOP1               | Topoisomerase I; nuclear enzyme that relieves torsional strain in DNA by cleaving and re-sealing the phosphodiester backbone; relaxes both positively and negatively supercoiled DNA; functions in replication, transcription, and recombination                                                                                                                                                                    | <a href="http://www.yeastgenome.org/cgi-bin/locus.fpl?locus=TOP1">http://www.yeastgenome.org/cgi-bin/locus.fpl?locus=TOP1</a> |

| Location     | Strains |      |      |      |     |      |      |      |     |     | Nuc change | Effect        | Systematic gene name | Cdn change | Amino acid change | Standard gene name | Gene description                                                                                                                                                                                                                                                                                                                                                                                                      | Link to SGD                                                                                                                     |
|--------------|---------|------|------|------|-----|------|------|------|-----|-----|------------|---------------|----------------------|------------|-------------------|--------------------|-----------------------------------------------------------------------------------------------------------------------------------------------------------------------------------------------------------------------------------------------------------------------------------------------------------------------------------------------------------------------------------------------------------------------|---------------------------------------------------------------------------------------------------------------------------------|
|              | AAC     | M715 | MH23 | MH34 | A64 | B130 | B184 | C120 | D5  | F83 |            |               |                      |            |                   |                    |                                                                                                                                                                                                                                                                                                                                                                                                                       |                                                                                                                                 |
| chr16:72809  |         |      |      |      | SNV | SNV  | SNV  | SNV  | SNV | SNV | G/A        | Nonsynonymous | YPL253C              | Cct/Tct    | P46S              | VIK1               | Protein that forms a kinesin-14 heterodimeric motor with Kar3p; localizes Kar3p at mitotic spindle poles; has a structure similar to a kinesin motor domain but lacks an ATP-binding site and is catalytically inactive; binds microtubules; required for sister chromatid cohesion; VIK1 has a paralog, CIK1, that arose from the whole genome duplication                                                           | <a href="http://www.yeastgenome.org/cgi-bin/locus.fpl?locus=VIK1">http://www.yeastgenome.org/cgi-bin/locus.fpl?locus=VIK1</a>   |
| chr16:464746 |         |      |      |      | SNV | SNV  | SNV  | SNV  | SNV | SNV | G/A        | Nonsynonymous | YPL048W              | Gac/Aac    | D137N             | CAM1               | Nuclear protein required for transcription of MXR1; binds the MXR1 promoter in the presence of other nuclear factors; binds calcium and phospholipids; has similarity to translational cofactor EF-1 gamma                                                                                                                                                                                                            | <a href="http://www.yeastgenome.org/cgi-bin/locus.fpl?locus=CAM1">http://www.yeastgenome.org/cgi-bin/locus.fpl?locus=CAM1</a>   |
| chr16:595155 |         |      |      |      | SNV | SNV  | SNV  | SNV  | SNV | SNV | G/A        | Nonsynonymous | YPR018W              | Gaa/Aaa    | E251K             | RLF2               | Largest subunit (p90) of the Chromatin Assembly Complex (CAF-1); chromatin assembly by CAF-1 is important for multiple processes including silencing at telomeres, mating type loci, and rDNA; maintenance of kinetochore structure; deactivation of the DNA damage checkpoint after DNA repair; and chromatin dynamics during transcription                                                                          | <a href="http://www.yeastgenome.org/cgi-bin/locus.fpl?locus=RLF2">http://www.yeastgenome.org/cgi-bin/locus.fpl?locus=RLF2</a>   |
| chr2:182401  |         |      |      |      |     |      |      |      |     | SNV | C/T        | Nonsynonymous | YBL017C              | aGa/aAa    | R1299K            | PEP1(VPS10)        | Type I transmembrane sorting receptor for multiple vacuolar hydrolases; cycles between the late-Golgi and prevacuolar endosome-like compartments                                                                                                                                                                                                                                                                      | <a href="http://www.yeastgenome.org/cgi-bin/locus.fpl?locus=PEP1">http://www.yeastgenome.org/cgi-bin/locus.fpl?locus=PEP1</a>   |
| chr4:1138124 |         |      |      |      |     |      |      |      |     | SNV | G/A        | Nonsynonymous | YDR334W              | Gat/Aat    | D233N             | SWR1               | Swi2/Snf2-related ATPase; structural component of the SWR1 complex, which exchanges histone variant H2AZ (Htz1p) for chromatin-bound histone H2A; relocalizes to the cytosol in response to hypoxia                                                                                                                                                                                                                   | <a href="http://www.yeastgenome.org/cgi-bin/locus.fpl?locus=SWR1">http://www.yeastgenome.org/cgi-bin/locus.fpl?locus=SWR1</a>   |
| chr4:1343864 |         |      |      |      |     |      |      |      |     | SNV | G/A        | Nonsynonymous | YDR441C              | tCc/tTc    | S77F              | APT2               | Potential adenine phosphoribosyltransferase; encodes a protein with similarity to adenine phosphoribosyltransferase, but artificially expressed protein exhibits no enzymatic activity; APT2 has a paralog, APT1, that arose from the whole genome duplication                                                                                                                                                        | <a href="http://www.yeastgenome.org/cgi-bin/locus.fpl?locus=APT2">http://www.yeastgenome.org/cgi-bin/locus.fpl?locus=APT2</a>   |
| chr7:369204  |         |      |      |      |     |      |      |      |     |     |            | Nonsynonymous | YGL073W              | tTa/tCa    | L92S              | HSF1               | Trimeric heat shock transcription factor; activates multiple genes in response to highly diverse stresses, including hyperthermia; recognizes variable heat shock elements (HSEs) consisting of inverted NGAAN repeats; monitors translational status of cell at the ribosome through an RQC (Ribosomal Quality Control)-mediated translation-stress signal; involved in diauxic shift; posttranslationally regulated | <a href="http://www.yeastgenome.org/cgi-bin/locus.fpl?locus=HSF1">http://www.yeastgenome.org/cgi-bin/locus.fpl?locus=HSF1</a>   |
| chr7:369279  |         |      |      |      |     |      |      |      |     | SNV | C/T        | Nonsynonymous |                      | cCt/cTt    | P117L             |                    |                                                                                                                                                                                                                                                                                                                                                                                                                       |                                                                                                                                 |
| chr8:58626   |         |      |      |      |     |      |      |      |     |     |            | Nonsynonymous | YHL021C              | tCg/tTg    | S132L             | AIM17              | Putative protein of unknown function; the authentic, non-tagged protein is detected in highly purified mitochondria in high-throughput studies; null mutant displays reduced frequency of mitochondrial genome loss                                                                                                                                                                                                   | <a href="http://www.yeastgenome.org/cgi-bin/locus.fpl?locus=AIM17">http://www.yeastgenome.org/cgi-bin/locus.fpl?locus=AIM17</a> |
| chr8:58744   |         |      |      |      |     |      |      |      |     | SNV | G/A        | Nonsynonymous |                      | Cct/Tct    | P93S              |                    |                                                                                                                                                                                                                                                                                                                                                                                                                       |                                                                                                                                 |
| chr8:114325  |         |      |      |      |     |      |      |      |     |     |            | Nonsynonymous | YHR007C              | cCa/cTa    | P56L              | ERG11              | Lanosterol 14-alpha-demethylase; catalyzes the C-14 demethylation of lanosterol to form 4,4"-dimethyl cholesta-8,14,24-triene-3-beta-ol in the ergosterol biosynthesis pathway; member of the cytochrome P450 family; associated and coordinately regulated with the P450 reductase Ncp1p                                                                                                                             | <a href="http://www.yeastgenome.org/cgi-bin/locus.fpl?locus=ERG11">http://www.yeastgenome.org/cgi-bin/locus.fpl?locus=ERG11</a> |
| chr9:367955  |         |      |      |      |     |      |      |      |     |     |            | Nonsynonymous | YIR006C              | tCa/tTa    | S785L             | PAN1               | Part of actin cytoskeleton-regulatory complex Pan1p-Sla1p-End3p; associates with actin patches on cell cortex; promotes protein-protein interactions essential for endocytosis; binds to and activates Arp2/3 complex in vitro; phosphorylation of Thr-1225 is regulated by MAPK Hog1p in response to osmotic stress; previously thought to be a subunit of poly(A) ribonuclease                                      | <a href="http://www.yeastgenome.org/cgi-bin/locus.fpl?locus=PAN1">http://www.yeastgenome.org/cgi-bin/locus.fpl?locus=PAN1</a>   |

| Location      | Strains |      |      |      |     |      |      |      |    |     | Nuc change | Effect        | Systematic gene name | Cdn change | Amino acid change | Standard gene name | Gene description | Link to SGD                                                                                                                                                                                                                                                                                                                                                                                                                                                                           |                                                                                                                                         |
|---------------|---------|------|------|------|-----|------|------|------|----|-----|------------|---------------|----------------------|------------|-------------------|--------------------|------------------|---------------------------------------------------------------------------------------------------------------------------------------------------------------------------------------------------------------------------------------------------------------------------------------------------------------------------------------------------------------------------------------------------------------------------------------------------------------------------------------|-----------------------------------------------------------------------------------------------------------------------------------------|
|               | AAC     | M715 | MH23 | MH34 | A64 | B130 | B184 | C120 | D5 | F83 |            |               |                      |            |                   |                    |                  |                                                                                                                                                                                                                                                                                                                                                                                                                                                                                       |                                                                                                                                         |
| chr10:255973  |         |      |      |      |     |      |      |      |    |     | SNV        | C/T           | Nonsynonymous        | YJL085W    | tCt/tTt           | S196F              | EXO70            | Subunit of the exocyst complex; the exocyst mediates polarized targeting and tethering of post-Golgi secretory vesicles to active sites of exocytosis prior to SNARE-mediated fusion; PtdIns[4,5]P2-binding protein that localizes to exocytic sites in an actin-independent manner, targeting and anchoring the exocyst with Sec3p; involved in exocyst assembly; direct downstream effector of Rho3p and Cdc42p; relocalizes from bud neck to cytoplasm upon DNA replication stress | <a href="http://www.yeastgenome.org/cgi-bin/locus.fpl?locus=EXO70">http://www.yeastgenome.org/cgi-bin/locus.fpl?locus=EXO70</a>         |
| chr11:654652  |         |      |      |      |     |      |      |      |    |     | SNV        | G/A           | Nonsynonymous        | YKR103W    | Gaa/Aaa           | E754K              | NFT1             | Putative transporter of the MRP subfamily; adjacent ORFs YKR103W and YKR104W are merged in different strain backgrounds; MRP stands for multidrug resistance-associated protein                                                                                                                                                                                                                                                                                                       | <a href="http://www.yeastgenome.org/cgi-bin/locus.fpl?dbid=S000001811">http://www.yeastgenome.org/cgi-bin/locus.fpl?dbid=S000001811</a> |
| chr11:654754  |         |      |      |      |     |      |      |      |    | SNV | G/A        | Nonsynonymous | GGa/AAa              |            | G788K             |                    |                  |                                                                                                                                                                                                                                                                                                                                                                                                                                                                                       |                                                                                                                                         |
| chr11:654755  |         |      |      |      |     |      |      |      |    | SNV | G/A        | Nonsynonymous |                      |            |                   |                    |                  |                                                                                                                                                                                                                                                                                                                                                                                                                                                                                       |                                                                                                                                         |
| chr11:654970  |         |      |      |      |     |      |      |      |    | SNV | G/A        | Nonsynonymous | Gac/Aac              |            | D860N             |                    |                  |                                                                                                                                                                                                                                                                                                                                                                                                                                                                                       |                                                                                                                                         |
| chr12:121186  |         |      |      |      |     |      |      |      |    |     | SNV        | C/T           | Nonsynonymous        | YLL007C    | Gaa/Aaa           | E54K               |                  | Putative protein of unknown function; green fluorescent protein (GFP)-fusion protein localizes to the cytoplasm; YLL007C is not an essential gene                                                                                                                                                                                                                                                                                                                                     | <a href="http://www.yeastgenome.org/cgi-bin/locus.fpl?locus=YLL007">http://www.yeastgenome.org/cgi-bin/locus.fpl?locus=YLL007</a>       |
| chr12:1032728 |         |      |      |      |     |      |      |      |    |     | SNV        | T/A           | Stop gained          | YLR454W    | tTa/tAa           | L1237*             | FMP27            | Putative protein of unknown function; the authentic, non-tagged protein is detected in highly purified mitochondria in high-throughput studies                                                                                                                                                                                                                                                                                                                                        | <a href="http://www.yeastgenome.org/cgi-bin/locus.fpl?locus=FMP27">http://www.yeastgenome.org/cgi-bin/locus.fpl?locus=FMP27</a>         |
| chr13:819980  |         |      |      |      |     |      |      |      |    |     | SNV        | G/A           | Nonsynonymous        | YMR279C    | Ct/Tt             | L301F              |                  | Putative boron transporter involved in boron efflux and resistance; overexpression mutant but not null mutant displays boron tolerance phenotype; identified as a heat-induced gene in a high-throughput screen; YMR279C is not an essential gene; YMR279C has a paralog, ATR1, that arose from the whole genome duplication                                                                                                                                                          | <a href="http://www.yeastgenome.org/cgi-bin/locus.fpl?locus=YMR279C">http://www.yeastgenome.org/cgi-bin/locus.fpl?locus=YMR279C</a>     |
| chr13:821772  |         |      |      |      |     |      |      |      |    |     | SNV        | G/A           | Stop gained          | YMR280C    | Caa/Taa           | Q1359*             | CAT8             | Zinc cluster transcriptional activator; necessary for derepression of a variety of genes under non-fermentative growth conditions, active after diauxic shift, binds carbon source responsive elements; relative distribution to the nucleus increases upon DNA replication stress                                                                                                                                                                                                    | <a href="http://www.yeastgenome.org/cgi-bin/locus.fpl?locus=CAT8">http://www.yeastgenome.org/cgi-bin/locus.fpl?locus=CAT8</a>           |
| chr14:162701  |         |      |      |      |     |      |      |      |    |     | SNV        | G/A           | Nonsynonymous        | YNL254C    | tCt/tTt           | S173F              | RTC4             | Protein of unknown function; null mutation suppresses cdc13-1 temperature sensitivity; (GFP)-fusion protein localizes to both the cytoplasm and the nucleus                                                                                                                                                                                                                                                                                                                           | <a href="http://www.yeastgenome.org/cgi-bin/locus.fpl?locus=RTC4">http://www.yeastgenome.org/cgi-bin/locus.fpl?locus=RTC4</a>           |
| chr15:279919  |         |      |      |      |     |      |      |      |    |     | SNV        | C/T           | Nonsynonymous        | YOL023W    | cCt/cTt           | P673L              | IFM1             | Mitochondrial translation initiation factor 2                                                                                                                                                                                                                                                                                                                                                                                                                                         | <a href="http://www.yeastgenome.org/cgi-bin/locus.fpl?locus=IFM1">http://www.yeastgenome.org/cgi-bin/locus.fpl?locus=IFM1</a>           |
| chr2:645838   |         |      |      |      |     |      |      |      |    |     | SNV        | G/A           | Nonsynonymous        | YBR213W    | Gaa/Aaa           | E265K              | MET8             | Bifunctional dehydrogenase and ferrocyclase; involved in the biosynthesis of siroheme, a prosthetic group used by sulfite reductase; required for sulfate assimilation and methionine biosynthesis                                                                                                                                                                                                                                                                                    | <a href="http://www.yeastgenome.org/cgi-bin/locus.fpl?locus=MET8">http://www.yeastgenome.org/cgi-bin/locus.fpl?locus=MET8</a>           |
| chr6:159482   |         |      |      |      |     |      |      |      |    |     | SNV        | C/T           | Stop gained          | YFR008W    | Caa/Taa           | Q27*               | FAR7             | Protein involved in recovery from pheromone-induced cell cycle arrest; acts in a Far1p-independent pathway; interacts with Far3p, Far8p, Far9p, Far10p, and Far11p; protein abundance increases in response to DNA replication stress                                                                                                                                                                                                                                                 | <a href="http://www.yeastgenome.org/cgi-bin/locus.fpl?locus=FAR7">http://www.yeastgenome.org/cgi-bin/locus.fpl?locus=FAR7</a>           |
| chr7:344703   |         |      |      |      |     |      |      |      |    |     | SNV        | C/T           | Nonsynonymous        | YGL090W    | tCc/tTc           | S403F              | LIF1             | Component of the DNA ligase IV complex; this complex mediates nonhomologous end joining in DNA double-strand break repair; physically interacts with Dnl4p and Nej1p; homologous to mammalian XRCC4 protein                                                                                                                                                                                                                                                                           | <a href="http://www.yeastgenome.org/cgi-bin/locus.fpl?locus=LIF1">http://www.yeastgenome.org/cgi-bin/locus.fpl?locus=LIF1</a>           |

| Location     | Strains |      |      |      |     |      |      |      |    |     | Nuc change | Effect        | Systematic gene name | Cdn change | Amino acid change | Standard gene name | Gene description | Link to SGD                                                                                                                                                                                                                                                                                                                 |                                                                                                                                     |
|--------------|---------|------|------|------|-----|------|------|------|----|-----|------------|---------------|----------------------|------------|-------------------|--------------------|------------------|-----------------------------------------------------------------------------------------------------------------------------------------------------------------------------------------------------------------------------------------------------------------------------------------------------------------------------|-------------------------------------------------------------------------------------------------------------------------------------|
|              | AAC     | M715 | MH23 | MH34 | A64 | B130 | B184 | C120 | D5 | F83 |            |               |                      |            |                   |                    |                  |                                                                                                                                                                                                                                                                                                                             |                                                                                                                                     |
| chr10:117718 |         |      |      |      |     |      |      |      |    |     | SNV        | G/A           | Nonsynonymous        | YJL153C    | Ctt/Ttt           | L236F              | INO1             | Inositol-3-phosphate synthase; involved in synthesis of inositol phosphates and inositol-containing phospholipids; transcription is coregulated with other phospholipid biosynthetic genes by Ino2p and Ino4p, which bind the UASINO DNA element                                                                            | <a href="http://www.yeastgenome.org/cgi-bin/locus.fpl?locus=INO1">http://www.yeastgenome.org/cgi-bin/locus.fpl?locus=INO1</a>       |
| chr10:270895 |         |      |      |      |     |      |      |      |    |     | SNV        | C/T           | Nonsynonymous        | YJL080C    | Ggt/Agt           | G298S              | SCP160           | Essential RNA-binding G protein effector of mating response pathway; mainly associated with nuclear envelope and ER, interacts in mRNA-dependent manner with translating ribosomes via multiple KH domains, similar to vertebrate vigilins                                                                                  | <a href="http://www.yeastgenome.org/cgi-bin/locus.fpl?locus=SCP160">http://www.yeastgenome.org/cgi-bin/locus.fpl?locus=SCP160</a>   |
| chr12:752156 |         |      |      |      |     |      |      |      |    |     | SNV        | A/T           | Nonsynonymous        | YLR318W    | Agc/Tgc           | S202C              | EST2             | Reverse transcriptase subunit of the telomerase holoenzyme; essential for telomerase core catalytic activity, involved in other aspects of telomerase assembly and function; mutations in human homolog are associated with aplastic anemia; Also known as: TERT                                                            | <a href="http://www.yeastgenome.org/cgi-bin/locus.fpl?locus=EST2">http://www.yeastgenome.org/cgi-bin/locus.fpl?locus=EST2</a>       |
| chr16:714202 |         |      |      |      |     |      |      |      |    |     | SNV        | T/C           | Nonsynonymous        | YPR089W    | tTa/tCa           | L332S              |                  | Protein of unknown function; exhibits genetic interaction with ERG11 and protein-protein interaction with Hsp82p                                                                                                                                                                                                            | <a href="http://www.yeastgenome.org/cgi-bin/locus.fpl?locus=YPR089W">http://www.yeastgenome.org/cgi-bin/locus.fpl?locus=YPR089W</a> |
| chr4:85150   |         |      |      |      |     |      |      |      |    |     | SNV        | G/A           | Nonsynonymous        | YDL209C    | CCa/TTa           | P278L              | CWC2             | Member of the NineTeen Complex (NTC); this complex contains Prp19p and stabilizes U6 snRNA in catalytic forms of the spliceosome containing U2, U5, and U6 snRNAs; binds directly to U6 snRNA; similar to S. pombe Cwf2                                                                                                     | <a href="http://www.yeastgenome.org/cgi-bin/locus.fpl?locus=CWC2">http://www.yeastgenome.org/cgi-bin/locus.fpl?locus=CWC2</a>       |
| chr4:85151   |         |      |      |      |     |      |      |      |    | SNV | G/A        | Nonsynonymous |                      |            |                   |                    |                  |                                                                                                                                                                                                                                                                                                                             |                                                                                                                                     |
| chr4:439286  |         |      |      |      |     |      |      |      |    |     | SNV        | A/T           | Nonsynonymous        | YDL006W    | tAt/tTt           | Y144F              | PTC1             | Type 2C protein phosphatase (PP2C); dephosphorylates Hog1p, inactivating osmosensing MAPK cascade; involved in Fus3p activation during pheromone response; deletion affects precursor tRNA splicing, mitochondrial inheritance, and sporulation                                                                             | <a href="http://www.yeastgenome.org/cgi-bin/locus.fpl?locus=PTC1">http://www.yeastgenome.org/cgi-bin/locus.fpl?locus=PTC1</a>       |
| chr4:642292  |         |      |      |      |     |      |      |      |    |     | SNV        | G/A           | Nonsynonymous        | YDR097C    | tCt/tTt           | S209F              | MSH6             | Protein required for mismatch repair in mitosis and meiosis; forms a complex with Msh2p to repair both single-base & insertion-deletion mispairs; also involved in interstrand cross-link repair; potentially phosphorylated by Cdc28p                                                                                      | <a href="http://www.yeastgenome.org/cgi-bin/locus.fpl?locus=MSH6">http://www.yeastgenome.org/cgi-bin/locus.fpl?locus=MSH6</a>       |
| chr4:1248040 |         |      |      |      |     |      |      |      |    |     | SNV        | C/T           | Nonsynonymous        | YDR387C    | Gaa/Aaa           | E270K              |                  | Putative transporter; member of the sugar porter family; YDR387C is not an essential gene                                                                                                                                                                                                                                   | <a href="http://www.yeastgenome.org/cgi-bin/locus.fpl?locus=YDR387C">http://www.yeastgenome.org/cgi-bin/locus.fpl?locus=YDR387C</a> |
| chr4:1378469 |         |      |      |      |     |      |      |      |    |     | SNV        | C/T           | Nonsynonymous        | YDR457W    | tCc/tTc           | S3218F             | TOM1             | E3 ubiquitin ligase of the hect-domain class; has a role in mRNA export from the nucleus and may regulate transcriptional coactivators; involved in degradation of excess histones; interacts with Dia2p and is required for Dia2p degradation; required to target Cdc6p for ubiquitin-mediated destruction during G1 phase | <a href="http://www.yeastgenome.org/cgi-bin/locus.fpl?locus=TOM1">http://www.yeastgenome.org/cgi-bin/locus.fpl?locus=TOM1</a>       |
| chr4:1380160 |         |      |      |      |     |      |      |      |    |     | SNV        | C/T           | Nonsynonymous        | YDR458C    | aGa/aAa           | R305K              | HEH2             | Inner nuclear membrane (INM) protein; contains helix-extension-helix (HEH) motif, nuclear localization signal sequence; targeting to the INM requires the Srp1p-Kap95p karyopherins and the Ran cycle; HEH2 has a paralog, SRC1, that arose from the whole genome duplication                                               | <a href="http://www.yeastgenome.org/cgi-bin/locus.fpl?locus=HEH2">http://www.yeastgenome.org/cgi-bin/locus.fpl?locus=HEH2</a>       |
| chr4:1381362 |         |      |      |      |     |      |      |      |    |     | SNV        | C/A           | Nonsynonymous        | YDR459C    | aGt/aTt           | S370I              | PFA5             | Palmitoyltransferase with autoacylation activity; likely functions in pathway(s) outside Ras; member of a family of putative palmitoyltransferases containing an Asp-His-His-Cys-cysteine rich (DHHC-CRD) domain                                                                                                            | <a href="http://www.yeastgenome.org/cgi-bin/locus.fpl?locus=PFA5">http://www.yeastgenome.org/cgi-bin/locus.fpl?locus=PFA5</a>       |
| chr4:1381372 |         |      |      |      |     |      |      |      |    | SNV | C/T        | Nonsynonymous | Ggt/Agt              |            |                   |                    |                  |                                                                                                                                                                                                                                                                                                                             |                                                                                                                                     |
| chr7:1060822 |         |      |      |      |     |      |      |      |    |     | SNV        | A/G           | Nonsynonymous        | YGR284C    | tTa/tCa           | L193S              | ERV29            | Protein localized to COPII-coated vesicles; involved in vesicle formation and incorporation of specific secretory cargo; protein abundance increases in response to DNA replication stress                                                                                                                                  | <a href="http://www.yeastgenome.org/cgi-bin/locus.fpl?locus=ERV29">http://www.yeastgenome.org/cgi-bin/locus.fpl?locus=ERV29</a>     |

| Location     | Strains |      |      |      |     |      |      |      |    |     | Nuc change | Effect                   | Systematic gene name | Cdn change | Amino acid change | Standard gene name | Gene description | Link to SGD                                                                                                                                                                                                                                                                                                                                                                              |                                                                                                                                     |
|--------------|---------|------|------|------|-----|------|------|------|----|-----|------------|--------------------------|----------------------|------------|-------------------|--------------------|------------------|------------------------------------------------------------------------------------------------------------------------------------------------------------------------------------------------------------------------------------------------------------------------------------------------------------------------------------------------------------------------------------------|-------------------------------------------------------------------------------------------------------------------------------------|
|              | AAC     | M715 | MH23 | MH34 | A64 | B130 | B184 | C120 | D5 | F83 |            |                          |                      |            |                   |                    |                  |                                                                                                                                                                                                                                                                                                                                                                                          |                                                                                                                                     |
| chr12:101816 |         |      |      |      |     |      |      |      |    |     | SNV        | C/T                      | Stop gained          | YLL015W    | Caa/Taa           | Q128*              | BPT1             | ABC type transmembrane transporter of MRP/CFTR family; found in vacuolar membrane, involved in the transport of unconjugated bilirubin and in heavy metal detoxification via glutathione conjugates, along with Ycf1p                                                                                                                                                                    | <a href="http://www.yeastgenome.org/cgi-bin/locus.fpl?locus=BPT1">http://www.yeastgenome.org/cgi-bin/locus.fpl?locus=BPT1</a>       |
| chr13:680767 |         |      |      |      |     |      |      |      |    |     | SNV        | C/T                      | Nonsynonymous        | YMR209C    | Gat/Aat           | D405N              |                  | Putative S-adenosylmethionine-dependent methyltransferase; YMR209C is not an essential gene                                                                                                                                                                                                                                                                                              | <a href="http://www.yeastgenome.org/cgi-bin/locus.fpl?locus=YMR209C">http://www.yeastgenome.org/cgi-bin/locus.fpl?locus=YMR209C</a> |
| chr13:731688 |         |      |      |      |     |      |      |      |    |     | SNV        | G/A                      | Nonsynonymous        | YMR232W    | Gat/Aat           | D17N               | FUS2             | Cytoplasmic protein localized to the shmoo tip; required for the alignment of parental nuclei before nuclear fusion during mating                                                                                                                                                                                                                                                        | <a href="http://www.yeastgenome.org/cgi-bin/locus.fpl?locus=FUS2">http://www.yeastgenome.org/cgi-bin/locus.fpl?locus=FUS2</a>       |
| chr15:496253 |         |      |      |      |     |      |      |      |    |     | SNV        | C/T                      | Nonsynonymous        | YOR092W    | tCc/tTc           | S312F              | ECM3             | Non-essential protein of unknown function; involved in signal transduction and the genotoxic response; induced rapidly in response to treatment with 8-methoxy-psoralen and UVA irradiation; relocalizes from ER to cytoplasm upon DNA replication stress; ECM3 has a paralog, YNL095C, that arose from the whole genome duplication                                                     | <a href="http://www.yeastgenome.org/cgi-bin/locus.fpl?locus=ECM3">http://www.yeastgenome.org/cgi-bin/locus.fpl?locus=ECM3</a>       |
| chr16:360804 |         |      |      |      |     |      |      |      |    |     | SNV        | C/T                      | Nonsynonymous        | YPL101W    | Ccg/Tcg           | P223S              | ELP4             | Subunit of hexameric RecA-like ATPase Elp456 Elongator subcomplex; which is required for modification of wobble nucleosides in tRNA; required for Elongator structural integrity                                                                                                                                                                                                         | <a href="http://www.yeastgenome.org/cgi-bin/locus.fpl?locus=ELP4">http://www.yeastgenome.org/cgi-bin/locus.fpl?locus=ELP4</a>       |
| chr16:571094 |         |      |      |      |     |      |      |      |    |     | SNV        | C/T                      | Nonsynonymous        | YPR007C    | Gaa/Aaa           | E74K               | REC8             | Meiosis-specific component of sister chromatid cohesion complex; maintains cohesion between sister chromatids during meiosis I; maintains cohesion between centromeres of sister chromatids until meiosis II; independent of its role in sister chromatid cohesion, Rec8p promotes allelic collisions and prevents nonspecific chromosome interactions; homolog of <i>S. pombe</i> Rec8p | <a href="http://www.yeastgenome.org/cgi-bin/locus.fpl?locus=REC8">http://www.yeastgenome.org/cgi-bin/locus.fpl?locus=REC8</a>       |
| chr16:907673 |         |      |      |      |     |      |      |      |    |     | SNV        | C/T                      | Nonsynonymous        | YPR185W    | Ctc/Ttc           | L152F              | ATG13            | Regulatory subunit of the Atg1p signaling complex; stimulates Atg1p kinase activity; required for vesicle formation during autophagy and the cytoplasm-to-vacuole targeting (Cvt) pathway; contains a HORMA domain required for autophagy and for recruitment of the phosphatidylinositol 3-kinase complex subunit Atg14p to the pre-autophagosomal structure                            | <a href="http://www.yeastgenome.org/cgi-bin/locus.fpl?locus=ATG13">http://www.yeastgenome.org/cgi-bin/locus.fpl?locus=ATG13</a>     |
| chr4:1219453 |         |      |      |      |     |      |      |      |    |     | SNV        | G/A                      | Nonsynonymous        | YDR371W    | aGa/aAa           | R335K              | CTS2             | Putative chitinase; functionally complements <i>A. gossypii</i> cts2 mutant sporulation defect                                                                                                                                                                                                                                                                                           | <a href="http://www.yeastgenome.org/cgi-bin/locus.fpl?locus=CTS2">http://www.yeastgenome.org/cgi-bin/locus.fpl?locus=CTS2</a>       |
| chr4:1223310 |         |      |      |      |     |      |      |      |    |     | SNV        | G/T                      | Nonsynonymous        | YDR374C    | tCc/tAc           | S41Y               | PHO92            | Posttranscriptional regulator of phosphate metabolism; regulates PHO4 mRNA stability by binding to PHO4's 3'UTR in phosphate-dependent manner; contains YTH (YT521-B Homology) domain and is a homolog of human YTHDF2                                                                                                                                                                   | <a href="http://www.yeastgenome.org/cgi-bin/locus.fpl?locus=YDR374C">http://www.yeastgenome.org/cgi-bin/locus.fpl?locus=YDR374C</a> |
| chr4:1223393 |         |      |      |      |     |      |      |      |    | INS | */+A       | Frame shift, 1 bp insert |                      |            |                   |                    |                  |                                                                                                                                                                                                                                                                                                                                                                                          |                                                                                                                                     |
| chr4:1223394 |         |      |      |      |     |      |      |      |    | SNV | T/C        | Nonsynonymous            | tAc/tGc              |            | Y/C               |                    |                  |                                                                                                                                                                                                                                                                                                                                                                                          |                                                                                                                                     |
| chr5:35587   |         |      |      |      |     |      |      |      |    |     | SNV        | G/A                      | Nonsynonymous        | YEL061C    | Ctt/Ttt           | L675F              | CIN8             | Kinesin motor protein; involved in mitotic spindle assembly and chromosome segregation                                                                                                                                                                                                                                                                                                   | <a href="http://www.yeastgenome.org/cgi-bin/locus.fpl?locus=CIN8">http://www.yeastgenome.org/cgi-bin/locus.fpl?locus=CIN8</a>       |
| chr5:422289  |         |      |      |      |     |      |      |      |    |     | SNV        | C/T                      | Nonsynonymous        | YER131W    | CCa/TTa           | P101L              | RPS26B           | Protein component of the small (40S) ribosomal subunit; homologous to mammalian ribosomal protein S26, no bacterial homolog; RPS26B has a paralog, RPS26A, that arose from the whole genome duplication                                                                                                                                                                                  | <a href="http://www.yeastgenome.org/cgi-bin/locus.fpl?locus=RPS26B">http://www.yeastgenome.org/cgi-bin/locus.fpl?locus=RPS26B</a>   |
| chr5:422290  |         |      |      |      |     |      |      |      |    | SNV | C/T        | Nonsynonymous            |                      |            |                   |                    |                  |                                                                                                                                                                                                                                                                                                                                                                                          |                                                                                                                                     |
| chr7:306189  |         |      |      |      |     |      |      |      |    |     | SNV        | G/A                      | Nonsynonymous        | YGL107C    | Ctt/Ttt           | L88F               | RMD9             | Mitochondrial protein required for respiratory growth; mutant phenotype and genetic interactions suggest a role in delivering mt mRNAs to ribosomes; located on matrix face of the inner membrane and loosely associated with mitoribosomes; RMD9 has a paralog, YBR238C, that arose from the whole genome duplication                                                                   | <a href="http://www.yeastgenome.org/cgi-bin/locus.fpl?locus=RMD9">http://www.yeastgenome.org/cgi-bin/locus.fpl?locus=RMD9</a>       |

| Location     | Strains |      |      |      |     |      |      |      |    |     | Nuc change | Effect        | Systematic gene name | Cdn change | Amino acid change | Standard gene name | Gene description                                                                                                                                                                                                                                                                                                                          | Link to SGD                                                                                                                       |
|--------------|---------|------|------|------|-----|------|------|------|----|-----|------------|---------------|----------------------|------------|-------------------|--------------------|-------------------------------------------------------------------------------------------------------------------------------------------------------------------------------------------------------------------------------------------------------------------------------------------------------------------------------------------|-----------------------------------------------------------------------------------------------------------------------------------|
|              | AAC     | M715 | MH23 | MH34 | A64 | B130 | B184 | C120 | D5 | F83 |            |               |                      |            |                   |                    |                                                                                                                                                                                                                                                                                                                                           |                                                                                                                                   |
| chr7:867888  |         |      |      |      |     | SNV  |      |      |    |     | C/T        | Nonsynonymous | YGR186W              | cCc/cTc    | P102L             | TFG1               | TFIIF (Transcription Factor II) largest subunit; involved in both transcription initiation and elongation of RNA polymerase II; homologous to human RAP74                                                                                                                                                                                 | <a href="http://www.yeastgenome.org/cgi-bin/locus.fpl?locus=TFG1">http://www.yeastgenome.org/cgi-bin/locus.fpl?locus=TFG1</a>     |
| chr8:77374   |         |      |      |      |     | SNV  |      |      |    |     | G/A        | Nonsynonymous | YHL009C              | Ctt/Ttt    | L283F             | YAP3               | Basic leucine zipper (bZIP) transcription factor                                                                                                                                                                                                                                                                                          | <a href="http://www.yeastgenome.org/cgi-bin/locus.fpl?dbid=S000001">http://www.yeastgenome.org/cgi-bin/locus.fpl?dbid=S000001</a> |
| chr12:660821 |         |      |      |      |     | SNV  |      |      |    |     | G/A        | Nonsynonymous | YLR266C              | aCt/aTt    | T627I             | PDR8               | Transcription factor; targets include ATP-binding cassette (ABC) transporters, major facilitator superfamily transporters, and other genes involved in the pleiotropic drug resistance (PDR) phenomenon; PDR8 has a paralog, YRR1, that arose from the whole genome duplication                                                           | <a href="http://www.yeastgenome.org/cgi-bin/locus.fpl?locus=PDR8">http://www.yeastgenome.org/cgi-bin/locus.fpl?locus=PDR8</a>     |
| chr12:686228 |         |      |      |      |     | SNV  |      |      |    |     | T/A        | Nonsynonymous | YLR278C              | Aat/Tat    | N935Y             |                    | Zinc-cluster protein; GFP-fusion protein localizes to the nucleus; mutant shows moderate growth defect on caffeine; has a prion-domain like fragment that increases frequency of [URE3]                                                                                                                                                   | <a href="http://www.yeastgenome.org/cgi-bin/locus.fpl?locus=YLR278">http://www.yeastgenome.org/cgi-bin/locus.fpl?locus=YLR278</a> |
| chr13:470350 |         |      |      |      |     | SNV  |      |      |    |     | G/A        | Stop gained   | YMR105C              | Caa/Taa    | Q453*             | PGM2               | Phosphoglucomutase; catalyzes the conversion from glucose-1-phosphate to glucose-6-phosphate, which is a key step in hexose metabolism; functions as the acceptor for a Glc-phosphotransferase; protein abundance increases in response to DNA replication stress; PGM2 has a paralog, PGM1, that arose from the whole genome duplication | <a href="http://www.yeastgenome.org/cgi-bin/locus.fpl?locus=PGM2">http://www.yeastgenome.org/cgi-bin/locus.fpl?locus=PGM2</a>     |
| chr13:658634 |         |      |      |      |     | SNV  |      |      |    |     | C/T        | Nonsynonymous | YMR199W              | tCa/tTa    | S444L             | CLN1               | G1 cyclin involved in regulation of the cell cycle; activates Cdc28p kinase to promote the G1 to S phase transition; late G1 specific expression depends on transcription factor complexes, MBF (Swi6p-Mbp1p) and SBF (Swi6p-Swi4p); CLN1 has a paralog, CLN2, that arose from the whole genome duplication                               | <a href="http://www.yeastgenome.org/cgi-bin/locus.fpl?locus=CLN1">http://www.yeastgenome.org/cgi-bin/locus.fpl?locus=CLN1</a>     |
| chr13:722740 |         |      |      |      |     | SNV  |      |      |    |     | A/T        | Nonsynonymous | YMR229C              | cTa/cAa    | L1033Q            | RRP5               | RNA binding protein involved in synthesis of both 18S and 5.8S rRNAs; component of both the ribosomal small subunit (SSU) processosome and the 90S preribosome; has binding preference for single stranded tracts of U's; relocalizes from nucleolus to nucleus upon DNA replication stress                                               | <a href="http://www.yeastgenome.org/cgi-bin/locus.fpl?locus=RRP5">http://www.yeastgenome.org/cgi-bin/locus.fpl?locus=RRP5</a>     |
| chr13:810872 |         |      |      |      |     | SNV  |      |      |    |     | G/A        | Nonsynonymous | YMR275C              | CCa/TTa    | P752L             | BUL1               | Ubiquitin-binding component of the Rsp5p E3-ubiquitin ligase complex; disruption causes temperature-sensitive growth, overexpression causes misrouting of amino acid permeases; BUL1 has a paralog, BUL2, that arose from the whole genome duplication                                                                                    | <a href="http://www.yeastgenome.org/cgi-bin/locus.fpl?locus=BUL1">http://www.yeastgenome.org/cgi-bin/locus.fpl?locus=BUL1</a>     |
| chr13:810873 |         |      |      |      |     | SNV  |      |      |    | G/A |            |               |                      |            |                   |                    |                                                                                                                                                                                                                                                                                                                                           |                                                                                                                                   |
| chr14:58173  |         |      |      |      |     | SNV  |      |      |    |     | G/A        | Nonsynonymous | YNL301C              | Ctt/Ttt    | L127F             | RPL18B             | Ribosomal 60S subunit protein L18B; homologous to mammalian ribosomal protein L18, no bacterial homolog; RPL18B has a paralog, RPL18A, that arose from the whole genome duplication                                                                                                                                                       | <a href="http://www.yeastgenome.org/cgi-bin/locus.fpl?locus=RPL18">http://www.yeastgenome.org/cgi-bin/locus.fpl?locus=RPL18</a>   |
| chr14:404160 |         |      |      |      |     | SNV  |      |      |    |     | T/C        | Nonsynonymous | YNL115C              | cAa/cGa    | Q628R             |                    | Putative protein of unknown function; green fluorescent protein (GFP)-fusion protein localizes to mitochondria; YNL115C is not an essential gene                                                                                                                                                                                          | <a href="http://www.yeastgenome.org/cgi-bin/locus.fpl?locus=YNL115">http://www.yeastgenome.org/cgi-bin/locus.fpl?locus=YNL115</a> |
| chr14:527549 |         |      |      |      |     | SNV  |      |      |    |     | C/T        | Nonsynonymous | YNL051W              | tCc/tTc    | S302F             | COG5               | Component of the conserved oligomeric Golgi complex; a cytosolic tethering complex (Cog1p through Cog8p) that functions in protein trafficking to mediate fusion of transport vesicles to Golgi compartments                                                                                                                              | <a href="http://www.yeastgenome.org/cgi-bin/locus.fpl?locus=COG5">http://www.yeastgenome.org/cgi-bin/locus.fpl?locus=COG5</a>     |

| Location     | Strains |      |      |      |     |      |      |      |    |     | Nuc change | Effect | Systematic gene name | Cdn change | Amino acid change | Standard gene name | Gene description                                                                                                                                                                                                                                                                                                                                                                                         | Link to SGD                                                                                                                     |
|--------------|---------|------|------|------|-----|------|------|------|----|-----|------------|--------|----------------------|------------|-------------------|--------------------|----------------------------------------------------------------------------------------------------------------------------------------------------------------------------------------------------------------------------------------------------------------------------------------------------------------------------------------------------------------------------------------------------------|---------------------------------------------------------------------------------------------------------------------------------|
|              | AAC     | M715 | MH23 | MH34 | A64 | B130 | B184 | C120 | D5 | F83 |            |        |                      |            |                   |                    |                                                                                                                                                                                                                                                                                                                                                                                                          |                                                                                                                                 |
| chr15:455418 |         |      |      |      |     |      |      |      |    |     |            |        | YOR069W              | Gaa/Aaa    | E508K             | VPS5               | Nexin-1 homolog; required for localizing membrane proteins from a prevacuolar/late endosomal compartment back to late Golgi; structural component of retromer membrane coat complex; forms a retromer subcomplex with Vps17p; required for recruiting the retromer complex to the endosome membranes; VPS5 has a paralog, YKR078W, that arose from the whole genome duplication; Also known as: YOR29-20 | <a href="http://www.yeastgenome.org/cgi-bin/locus.fpl?locus=VPS5">http://www.yeastgenome.org/cgi-bin/locus.fpl?locus=VPS5</a>   |
| chr15:455718 |         |      |      |      |     |      |      |      |    |     |            |        | Gaa/Aaa              | E608K      |                   |                    |                                                                                                                                                                                                                                                                                                                                                                                                          |                                                                                                                                 |
| chr15:455790 |         |      |      |      |     |      |      |      |    |     |            |        | Gat/Aat              | D632N      |                   |                    |                                                                                                                                                                                                                                                                                                                                                                                                          |                                                                                                                                 |
| chr15:765016 |         |      |      |      |     |      |      |      |    |     |            |        | YOR227W              | tTa/tAa    | L764*             | HER1               | Protein of unknown function; required for proliferation or remodeling of the ER that is caused by overexpression of Hmg2p; may interact with ribosomes, based on co-purification experiments; HER1 has a paralog, GIP3, that arose from the whole genome duplication                                                                                                                                     | <a href="http://www.yeastgenome.org/cgi-bin/locus.fpl?locus=HER1">http://www.yeastgenome.org/cgi-bin/locus.fpl?locus=HER1</a>   |
| chr15:977525 |         |      |      |      |     |      |      |      |    |     |            |        | YOR344C              | Gaa/Aaa    | E151K             | TYE7               | Serine-rich protein that contains a bHLH DNA binding motif; binds E-boxes of glycolytic genes and contributes to their activation; may function as a transcriptional activator in Ty1-mediated gene expression; bHLH stands for basic-helix-loop-helix                                                                                                                                                   | <a href="http://www.yeastgenome.org/cgi-bin/locus.fpl?locus=TYE7">http://www.yeastgenome.org/cgi-bin/locus.fpl?locus=TYE7</a>   |
| chr16:180376 |         |      |      |      |     |      |      |      |    |     |            |        | YPL194W              | gGa/gAa    | G388E             | DDC1               | DNA damage checkpoint protein; part of a PCNA-like complex required for DNA damage response, required for pachytene checkpoint to inhibit cell cycle in response to unrepaired recombination intermediates; potential Cdc28p substrate; forms nuclear foci upon DNA replication stress                                                                                                                   | <a href="http://www.yeastgenome.org/cgi-bin/locus.fpl?locus=DDC1">http://www.yeastgenome.org/cgi-bin/locus.fpl?locus=DDC1</a>   |
| chr16:224253 |         |      |      |      |     |      |      |      |    |     |            |        | YPL172C              | Cct/Tct    | P441S             | COX10              | Heme A:farnesyltransferase; catalyzes the first step in the conversion of protoheme to the heme A prosthetic group required for cytochrome c oxidase activity; human ortholog is associated with mitochondrial disorders                                                                                                                                                                                 | <a href="http://www.yeastgenome.org/cgi-bin/locus.fpl?locus=COX10">http://www.yeastgenome.org/cgi-bin/locus.fpl?locus=COX10</a> |
| chr16:463605 |         |      |      |      |     |      |      |      |    |     |            |        | YPL049C              | Gag/Aag    | E58K              | DIG1               | MAP kinase-responsive inhibitor of the Ste12p transcription factor; involved in the regulation of mating-specific genes and the invasive growth pathway; related regulators Dig1p and Dig2p bind to Ste12p; DIG1 has a paralog, DIG2, that arose from the whole genome duplication                                                                                                                       | <a href="http://www.yeastgenome.org/cgi-bin/locus.fpl?locus=DIG1">http://www.yeastgenome.org/cgi-bin/locus.fpl?locus=DIG1</a>   |
| chr16:570898 |         |      |      |      |     |      |      |      |    |     |            |        | YPR007C              | gGa/gAa    | G139E             | REC8               | Meiosis-specific component of sister chromatid cohesion complex; maintains cohesion between sister chromatids during meiosis I; maintains cohesion between centromeres of sister chromatids until meiosis II; independent of its role in sister chromatid cohesion, Rec8p promotes allelic collisions and prevents nonspecific chromosome interactions; homolog of S. pombe Rec8p                        | <a href="http://www.yeastgenome.org/cgi-bin/locus.fpl?locus=REC8">http://www.yeastgenome.org/cgi-bin/locus.fpl?locus=REC8</a>   |
| chr16:571076 |         |      |      |      |     |      |      |      |    |     |            |        |                      | Aga/Gga    | R80G              |                    |                                                                                                                                                                                                                                                                                                                                                                                                          |                                                                                                                                 |
| chr16:893015 |         |      |      |      |     |      |      |      |    |     |            |        | YPR178W              | Gat/Aat    | D225N             | PRP4               | Splicing factor; component of the U4/U6-U5 snRNP complex                                                                                                                                                                                                                                                                                                                                                 | <a href="http://www.yeastgenome.org/cgi-bin/locus.fpl?locus=PRP4">http://www.yeastgenome.org/cgi-bin/locus.fpl?locus=PRP4</a>   |
| chr1:121091  |         |      |      |      |     |      |      |      |    |     |            |        | YAL017W              | Cca/Tca    | P237S             | PSK1               | PAS domain-containing serine/threonine protein kinase; coordinately regulates protein synthesis and carbohydrate metabolism and storage in response to a unknown metabolite that reflects nutritional status; PSK1 has a paralog, PSK2, that arose from the whole genome duplication                                                                                                                     | <a href="http://www.yeastgenome.org/cgi-bin/locus.fpl?locus=PSK1">http://www.yeastgenome.org/cgi-bin/locus.fpl?locus=PSK1</a>   |
| chr4:192830  |         |      |      |      |     |      |      |      |    |     |            |        | YDL146W              | Gct/Act    | A449T             | LDB17              | Protein involved in the regulation of endocytosis; transiently recruited to actin cortical patches in a SLA1-dependent manner after late coat component assembly; GFP-fusion protein localizes to the periphery, cytoplasm, bud, and bud neck                                                                                                                                                            | <a href="http://www.yeastgenome.org/cgi-bin/locus.fpl?locus=LDB17">http://www.yeastgenome.org/cgi-bin/locus.fpl?locus=LDB17</a> |

| Location     | Strains |      |      |      |     |      |      |      |    |     | Nuc change    | Effect                   | Systematic gene name | Cdn change | Amino acid change | Standard gene name | Gene description                                                                                                                                                                                                                                                                                                                                                                                                                                    | Link to SGD                                                                                                                         |
|--------------|---------|------|------|------|-----|------|------|------|----|-----|---------------|--------------------------|----------------------|------------|-------------------|--------------------|-----------------------------------------------------------------------------------------------------------------------------------------------------------------------------------------------------------------------------------------------------------------------------------------------------------------------------------------------------------------------------------------------------------------------------------------------------|-------------------------------------------------------------------------------------------------------------------------------------|
|              | AAC     | M715 | MH23 | MH34 | A64 | B130 | B184 | C120 | D5 | F83 |               |                          |                      |            |                   |                    |                                                                                                                                                                                                                                                                                                                                                                                                                                                     |                                                                                                                                     |
| chr4:1284344 |         |      |      |      | SNV |      |      |      |    |     | A/G           | Nonsynonymous            | YDR407C              | Ttt/Ctt    | F873L             | TRS120             | One of 10 subunits of the transport protein particle (TRAPP) complex; the TRAPP complex is of the cis-Golgi and mediates vesicle docking and fusion; involved in endoplasmic reticulum (ER) to Golgi membrane traffic                                                                                                                                                                                                                               | <a href="http://www.yeastgenome.org/cgi-bin/locus.fpl?locus=TRS120">http://www.yeastgenome.org/cgi-bin/locus.fpl?locus=TRS120</a>   |
| chr5:307408  |         |      |      |      | SNV |      |      |      |    |     | C/T           | Nonsynonymous            | YER075C              | Gat/Aat    | D634N             | PTP3               | Phosphotyrosine-specific protein phosphatase; involved in the inactivation of mitogen-activated protein kinase (MAPK) during osmolarity sensing; dephosphorylates Hog1p MAPK and regulates its localization; localized to the cytoplasm                                                                                                                                                                                                             | <a href="http://www.yeastgenome.org/cgi-bin/locus.fpl?locus=PTP3">http://www.yeastgenome.org/cgi-bin/locus.fpl?locus=PTP3</a>       |
| chr5:452877  |         |      |      |      | SNV |      |      |      |    |     | T/C           | Nonsynonymous            | YER141W              | tTg/tCg    | L443S             | COX15              | Protein required for the hydroxylation of heme O to form heme A; heme A is an essential prosthetic group for cytochrome c oxidase                                                                                                                                                                                                                                                                                                                   | <a href="http://www.yeastgenome.org/cgi-bin/locus.fpl?locus=COX15">http://www.yeastgenome.org/cgi-bin/locus.fpl?locus=COX15</a>     |
| chr7:14809   |         |      |      |      | SNV |      |      |      |    |     | C/T           | Nonsynonymous            | YGL256W              | tCc/tTc    | S3F               | ADH4               | Alcohol dehydrogenase isoenzyme type IV; dimeric enzyme demonstrated to be zinc-dependent despite sequence similarity to iron activated alcohol dehydrogenases; transcription is induced in response to zinc deficiency                                                                                                                                                                                                                             | <a href="http://www.yeastgenome.org/cgi-bin/locus.fpl?locus=ADH4">http://www.yeastgenome.org/cgi-bin/locus.fpl?locus=ADH4</a>       |
| chr7:118523  |         |      |      |      | SNV |      |      |      |    |     | C/T           | Nonsynonymous            | YGL201C              | Gag/Aag    | E853K             | MCM6               | Protein involved in DNA replication; component of the Mcm2-7 hexameric helicase complex that binds chromatin as a part of the pre-replicative complex; forms a subcomplex with Mcm4p and Mcm7p                                                                                                                                                                                                                                                      | <a href="http://www.yeastgenome.org/cgi-bin/locus.fpl?locus=MCM6">http://www.yeastgenome.org/cgi-bin/locus.fpl?locus=MCM6</a>       |
| chr7:118585  |         |      |      |      | SNV |      |      |      |    | C/T | Nonsynonymous | aGg/aAag                 |                      | R832K      |                   |                    |                                                                                                                                                                                                                                                                                                                                                                                                                                                     |                                                                                                                                     |
| chr7:703922  |         |      |      |      | INS |      |      |      |    |     | */+A          | Frame shift, 1 bp insert | YGR108W              |            | 161               | CLB1               | B-type cyclin involved in cell cycle progression; activates Cdc28p to promote the transition from G2 to M phase; accumulates during G2 and M, then targeted via a destruction box motif for ubiquitin-mediated degradation by the proteasome; CLB1 has a paralog, CLB2, that arose from the whole genome duplication                                                                                                                                | <a href="http://www.yeastgenome.org/cgi-bin/locus.fpl?locus=CLB1">http://www.yeastgenome.org/cgi-bin/locus.fpl?locus=CLB1</a>       |
| chr7:859863  |         |      |      |      | SNV |      |      |      |    |     | C/T           | Nonsynonymous            | YGR184C              | Gat/Aat    | D1901N            | UBR1               | E3 ubiquitin ligase (N-recognin); heterodimerizes with Rad6p to ubiquitinate substrates in the N-end rule pathway; role in endoplasmic reticulum-associated protein degradation (ERAD) in the absence of canonical ER membrane ligases or after stress; major role in targeting misfolded cytosolic proteins for degradation; regulates peptide transport via Cup9p ubiquitination; mutation in human UBR1 causes Johansson-Blizzard Syndrome (JBS) | <a href="http://www.yeastgenome.org/cgi-bin/locus.fpl?locus=UBR1">http://www.yeastgenome.org/cgi-bin/locus.fpl?locus=UBR1</a>       |
| chr7:1008542 |         |      |      |      | SNV |      |      |      |    |     | A/T           | Nonsynonymous            | YGR258C              | gTt/gAt    | V664D             | RAD2               | Single-stranded DNA endonuclease; cleaves single-stranded DNA during nucleotide excision repair to excise damaged DNA; subunit of Nucleotide Excision Repair Factor 3 (NEF3); homolog of human XPG protein                                                                                                                                                                                                                                          | <a href="http://www.yeastgenome.org/cgi-bin/locus.fpl?locus=RAD2">http://www.yeastgenome.org/cgi-bin/locus.fpl?locus=RAD2</a>       |
| chr8:46429   |         |      |      |      | SNV |      |      |      |    |     | G/A           | Stop gained              | YHL026C              | Caa/Taa    | Q301*             |                    | Putative protein of unknown function; transcriptionally regulated by Upc2p via an upstream sterol response element; YHL026C is not an essential gene; in 2005 the start site was moved 141 nt upstream                                                                                                                                                                                                                                              | <a href="http://www.yeastgenome.org/cgi-bin/locus.fpl?locus=YHL026C">http://www.yeastgenome.org/cgi-bin/locus.fpl?locus=YHL026C</a> |
| chr9:183945  |         |      |      |      | SNV |      |      |      |    |     | C/T           | Nonsynonymous            | YIL095W              | cCa/cTa    | P4L               | PRK1               | Protein serine/threonine kinase; regulates the organization and function of the actin cytoskeleton and reduces endocytic ability of cell through the phosphorylation of the Pan1p-Sla1p-End3p protein complex; PRK1 has a paralog, ARK1, that arose from the whole genome duplication                                                                                                                                                               | <a href="http://www.yeastgenome.org/cgi-bin/locus.fpl?locus=PRK1">http://www.yeastgenome.org/cgi-bin/locus.fpl?locus=PRK1</a>       |
| chr10:310014 |         |      |      |      | SNV |      |      |      |    |     | C/A           | Nonsynonymous            | YJL058C              | Gca/Tca    | A142S             | BIT61              | Subunit of TORC2 membrane-associated complex; involved in regulation of cell cycle-dependent actin cytoskeletal dynamics during polarized growth and cell wall integrity; BIT61 has a paralog, BIT2, that arose from the whole genome duplication                                                                                                                                                                                                   | <a href="http://www.yeastgenome.org/cgi-bin/locus.fpl?locus=BIT61">http://www.yeastgenome.org/cgi-bin/locus.fpl?locus=BIT61</a>     |



| Location     | Strains |      |      |      |     |      |      |      |    |     | Nuc change | Effect        | Systematic gene name | Cdn change | Amino acid change | Standard gene name | Gene description                                                                                                                                                                                                                                                                                                                                                                    | Link to SGD                                                                                                                         |
|--------------|---------|------|------|------|-----|------|------|------|----|-----|------------|---------------|----------------------|------------|-------------------|--------------------|-------------------------------------------------------------------------------------------------------------------------------------------------------------------------------------------------------------------------------------------------------------------------------------------------------------------------------------------------------------------------------------|-------------------------------------------------------------------------------------------------------------------------------------|
|              | AAC     | M715 | MH23 | MH34 | A64 | B130 | B184 | C120 | D5 | F83 |            |               |                      |            |                   |                    |                                                                                                                                                                                                                                                                                                                                                                                     |                                                                                                                                     |
| chr11:102903 |         |      |      |      | SNV |      |      |      |    |     | T/C        | Nonsynonymous | YKL182W              | tTa/tCa    | L751S             | FAS1               | Beta subunit of fatty acid synthetase; complex catalyzes the synthesis of long-chain saturated fatty acids; contains acetyltransacylase, dehydratase, enoyl reductase, malonyl transacylase, and palmitoyl transacylase activities                                                                                                                                                  | <a href="http://www.yeastgenome.org/cgi-bin/locus.fpl?locus=FAS1">http://www.yeastgenome.org/cgi-bin/locus.fpl?locus=FAS1</a>       |
| chr12:674166 |         |      |      |      | SNV |      |      |      |    |     | T/C        | Nonsynonymous | YLR273C              | Aat/Gat    | N633D             | PIG1               | Putative targeting subunit for type-1 protein phosphatase Glc7p; tethers Glc7p to Gsy2p glycogen synthase; PIG1 has a paralog, GAC1, that arose from the whole genome duplication                                                                                                                                                                                                   | <a href="http://www.yeastgenome.org/cgi-bin/locus.fpl?locus=PIG1">http://www.yeastgenome.org/cgi-bin/locus.fpl?locus=PIG1</a>       |
| chr12:805637 |         |      |      |      | SNV |      |      |      |    |     | A/T        | Stop gained   | YLR345W              | Aaa/Taa    | K39*              |                    | Similar to 6-phosphofructo-2-kinase/fructose-2,6-bisphosphatase enzymes responsible for the metabolism of fructoso-2,6-bisphosphate; mRNA expression is repressed by the Rfx1p-Tup1p-Complex                                                                                                                                                                                        | <a href="http://www.yeastgenome.org/cgi-bin/locus.fpl?locus=YLR345W">http://www.yeastgenome.org/cgi-bin/locus.fpl?locus=YLR345W</a> |
| chr12:856143 |         |      |      |      | SNV |      |      |      |    |     | G/A        | Nonsynonymous | YLR373C              | CCg/TTg    | P17L              | VID22              | Glycosylated integral membrane protein localized to plasma membrane; plays a role in fructose-1,6-bisphosphatase (FBPase) degradation; involved in FBPase transport from the cytosol to Vid (vacuole import and degradation) vesicles; VID22 has a paralog, ENV11, that arose from the whole genome duplication                                                                     | <a href="http://www.yeastgenome.org/cgi-bin/locus.fpl?locus=VID22">http://www.yeastgenome.org/cgi-bin/locus.fpl?locus=VID22</a>     |
| chr12:856144 |         |      |      |      | SNV |      |      |      |    |     | G/A        |               |                      |            |                   |                    |                                                                                                                                                                                                                                                                                                                                                                                     |                                                                                                                                     |
| chr13:118428 |         |      |      |      | SNV |      |      |      |    |     | G/A        | Nonsynonymous | YML073C              | tCt/tTt    | S156F             | RPL6A              | Ribosomal 60S subunit protein L6A; N-terminally acetylated; binds 5.8S rRNA; homologous to mammalian ribosomal protein L6, no bacterial homolog; RPL6A has a paralog, RPL6B, that arose from the whole genome duplication                                                                                                                                                           | <a href="http://www.yeastgenome.org/cgi-bin/locus.fpl?locus=RPL6A">http://www.yeastgenome.org/cgi-bin/locus.fpl?locus=RPL6A</a>     |
| chr13:274080 |         |      |      |      | SNV |      |      |      |    |     | C/T        | Nonsynonymous | YMR006C              | gGt/gAt    | G108D             | PLB2               | Phospholipase B (lysophospholipase) involved in lipid metabolism; displays transacylase activity in vitro; overproduction confers resistance to lysophosphatidylcholine                                                                                                                                                                                                             | <a href="http://www.yeastgenome.org/cgi-bin/locus.fpl?locus=PLB2">http://www.yeastgenome.org/cgi-bin/locus.fpl?locus=PLB2</a>       |
| chr14:309348 |         |      |      |      | SNV |      |      |      |    |     | G/A        | Nonsynonymous | YNL172W              | aGa/aAa    | R1584K            | APC1               | Largest subunit of the Anaphase-Promoting Complex/Cyclosome; APC/C is a ubiquitin-protein ligase required for degradation of anaphase inhibitors, including mitotic cyclins, during the metaphase/anaphase transition; component of the platform domain of the APC/C, based on structural analysis; localizes to nuclear foci that become diffuse upon DNA replication stress       | <a href="http://www.yeastgenome.org/cgi-bin/locus.fpl?locus=APC1">http://www.yeastgenome.org/cgi-bin/locus.fpl?locus=APC1</a>       |
| chr14:650938 |         |      |      |      | SNV |      |      |      |    |     | G/A        | Nonsynonymous | YNR016C              | cCt/cTt    | P1488L            | ACC1               | Acetyl-CoA carboxylase, biotin containing enzyme; catalyzes carboxylation of cytosolic acetyl-CoA to form malonyl-CoA and regulates histone acetylation by regulating the availability of acetyl-CoA; required for de novo biosynthesis of long-chain fatty acids; ACC1 has a paralog, HFA1, that arose from the whole genome duplication                                           | <a href="http://www.yeastgenome.org/cgi-bin/locus.fpl?locus=ACC1">http://www.yeastgenome.org/cgi-bin/locus.fpl?locus=ACC1</a>       |
| chr15:535728 |         |      |      |      | SNV |      |      |      |    |     | C/T        | Nonsynonymous | YOR113W              | tCt/tTt    | S476F             | AZF1               | Zinc-finger transcription factor; involved in diauxic shift; in the presence of glucose, activates transcription of genes involved in growth and carbon metabolism; in nonfermentable carbon sources, activates transcription of genes involved in maintenance of cell wall integrity; relocates to the cytosol in response to hypoxia                                              | <a href="http://www.yeastgenome.org/cgi-bin/locus.fpl?locus=AZF1">http://www.yeastgenome.org/cgi-bin/locus.fpl?locus=AZF1</a>       |
| chr15:617684 |         |      |      |      | SNV |      |      |      |    |     | G/A        | Nonsynonymous | YOR152C              | Cca/Tca    | P170S             |                    | Putative protein of unknown function; YOR152C is not an essential gene                                                                                                                                                                                                                                                                                                              | <a href="http://www.yeastgenome.org/cgi-bin/locus.fpl?locus=YOR152C">http://www.yeastgenome.org/cgi-bin/locus.fpl?locus=YOR152C</a> |
| chr15:817509 |         |      |      |      | SNV |      |      |      |    |     | C/T        | Nonsynonymous | YOR262W              | cCg/cTg    | P108L             | GPN2               | Putative GTPase with a role in biogenesis of RNA pol II and polIII; may be involved in assembly of RNA polymerases II and III and in their transport into the nucleus; contains a Gly-Pro-Asn motif in the G domain; similar to Npa3p and Gpn3p; highly conserved across species and homologous to human gene GPN2/ATPBD1B; required for establishment of sister chromatid cohesion | <a href="http://www.yeastgenome.org/cgi-bin/locus.fpl?locus=GPN2">http://www.yeastgenome.org/cgi-bin/locus.fpl?locus=GPN2</a>       |
| chr16:146402 |         |      |      |      | SNV |      |      |      |    |     | G/A        | Stop gained   | YPL216W              | tgG/tgA    | W882*             |                    | Putative protein of unknown function; not an essential gene; YPL216W has a paralog, ITC1, that arose from the whole genome duplication                                                                                                                                                                                                                                              | <a href="http://www.yeastgenome.org/cgi-bin/locus.fpl?locus=YPL216W">http://www.yeastgenome.org/cgi-bin/locus.fpl?locus=YPL216W</a> |

| Location     | Strains |      |      |      |     |      |      |      |    |     | Nuc change | Effect        | Systematic gene name | Cdn change | Amino acid change | Standard gene name | Gene description                                                                                                                                                                                                                                                                                                                                 | Link to SGD                                                                                                                   |
|--------------|---------|------|------|------|-----|------|------|------|----|-----|------------|---------------|----------------------|------------|-------------------|--------------------|--------------------------------------------------------------------------------------------------------------------------------------------------------------------------------------------------------------------------------------------------------------------------------------------------------------------------------------------------|-------------------------------------------------------------------------------------------------------------------------------|
|              | AAC     | M715 | MH23 | MH34 | A64 | B130 | B184 | C120 | D5 | F83 |            |               |                      |            |                   |                    |                                                                                                                                                                                                                                                                                                                                                  |                                                                                                                               |
| chr16:274950 |         |      |      |      | SNV |      |      |      |    |     | C/T        | Stop gained   | YPL147W              | Caa/Taa    | Q605*             | PXA1               | Subunit of a heterodimeric peroxisomal ABC transport complex; required for import of long-chain fatty acids into peroxisomes; similarity to human adrenoleukodystrophy transporter ABCD1 and ABCD2 and ALD-related proteins; mutations in ABCD1 cause X-linked adrenoleukodystrophy (X-ALD), a peroxisomal disorder; complex also includes Pxa2p | <a href="http://www.yeastgenome.org/cgi-bin/locus.fpl?locus=PXA1">http://www.yeastgenome.org/cgi-bin/locus.fpl?locus=PXA1</a> |
| chr16:651647 |         |      |      |      | SNV |      |      |      |    |     | G/A        | Nonsynonymous | YPR042C              | tCa/tTa    | S648L             | PUF2               | mRNA-binding protein; member of the PUF protein family, which is defined by the presence of Pumilio homology domains that confer RNA binding activity; preferentially binds mRNAs encoding membrane-associated proteins; PUF2 has a paralog, JSN1, that arose from the whole genome duplication                                                  | <a href="http://www.yeastgenome.org/cgi-bin/locus.fpl?locus=PUF2">http://www.yeastgenome.org/cgi-bin/locus.fpl?locus=PUF2</a> |
| chr7:646593  |         | SNV  |      |      |     |      |      |      |    |     | G/T        | Nonsynonymous | YGR083C              | agC/agA    | S2R               | GCD2               | Delta subunit of the translation initiation factor eIF2B; the guanine-nucleotide exchange factor for eIF2; activity subsequently regulated by phosphorylated eIF2; first identified as a negative regulator of GCN4 expression                                                                                                                   | <a href="http://www.yeastgenome.org/cgi-bin/locus.fpl?locus=GCD2">http://www.yeastgenome.org/cgi-bin/locus.fpl?locus=GCD2</a> |
| chr15:918128 |         | SNV  |      |      |     |      |      |      |    |     | G/A        | Nonsynonymous | YOR321W              | Gcg/Acg    | A736T             | PMT3               | Protein O-mannosyltransferase; transfers mannose residues from dolichyl phosphate-D-mannose to protein serine/threonine residues; acts in a complex with Pmt5p, can instead interact with Pmt1p in some conditions; antifungal drug target; PMT3 has a paralog, PMT2, that arose from the whole genome duplication                               | <a href="http://www.yeastgenome.org/cgi-bin/locus.fpl?locus=PMT3">http://www.yeastgenome.org/cgi-bin/locus.fpl?locus=PMT3</a> |
